# Supplementary material for: Study on the Dynamic Changes in Non-Volatile Metabolites of Rizhao Green Tea Based on Metabolomics
Source: MDPI journal article supplement (doi:10.3390/molecules28217447), 2023-11-06
Supplement: s1 [file s1]

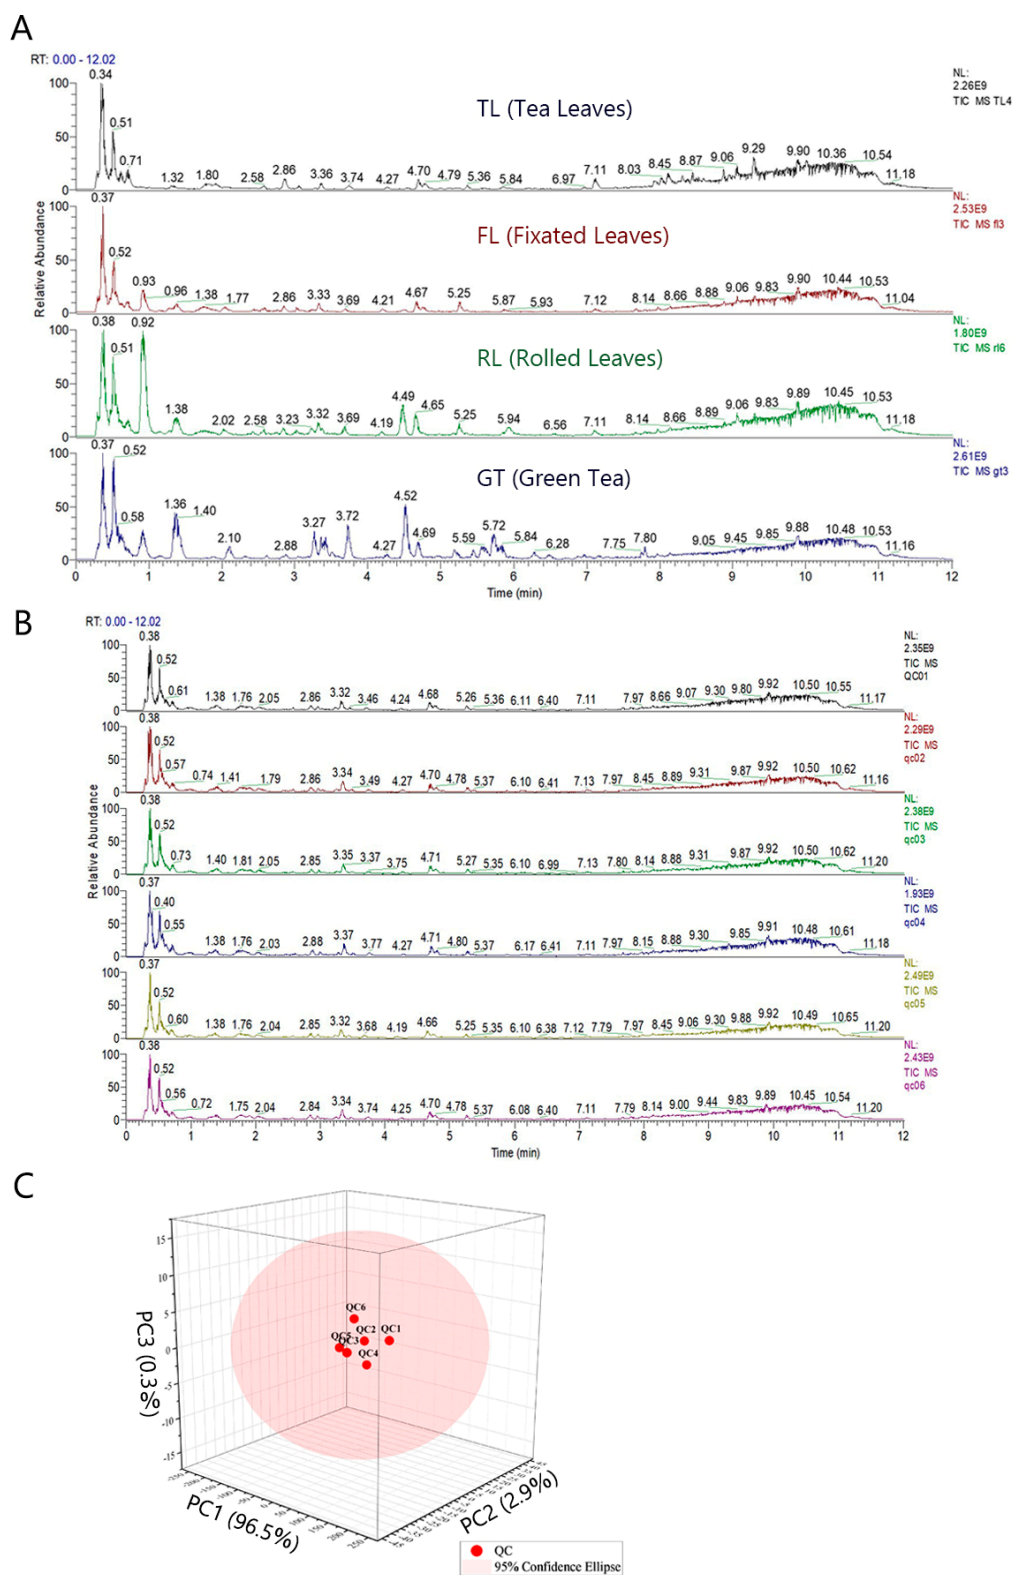

**Figure S1.** Obtained by C18 column in ESI<sup>-</sup> mode (A) TIC of tea samples with different processing (B) TIC of QC samples (C) 3D-principal component analysis of samples.

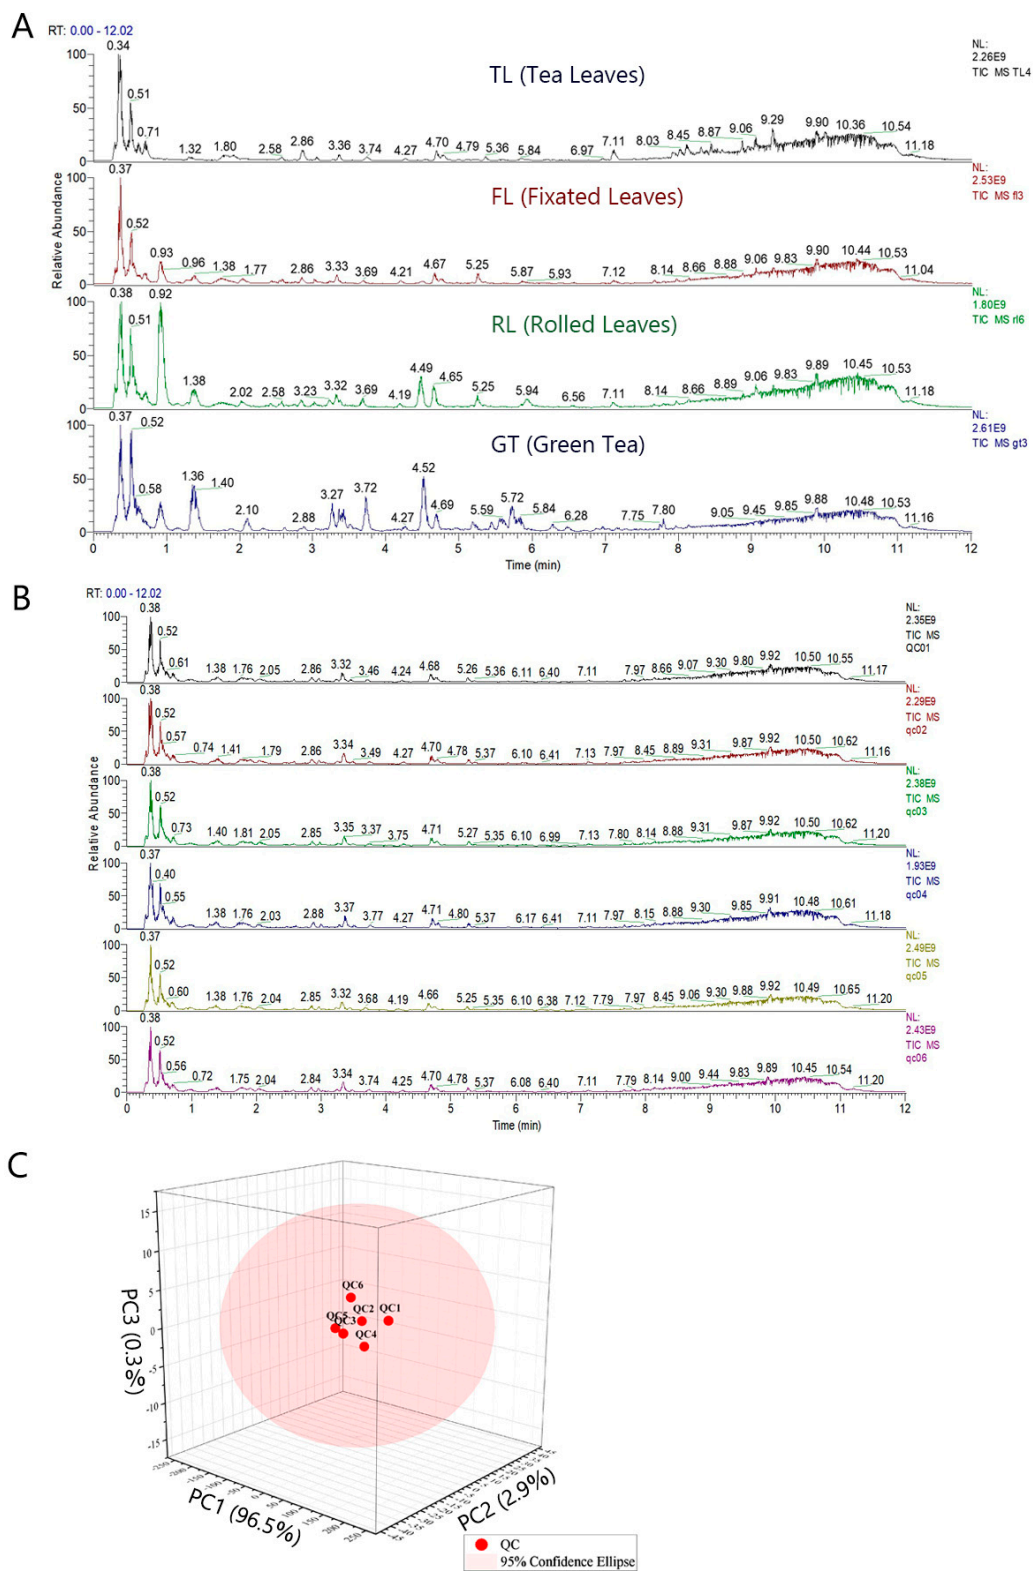

**Figure S2.** Obtained by HILIC column in ESI+ mode (A) TIC of tea samples with different processing (B) TIC of QC samples (C) 3D-principal component analysis of samples.

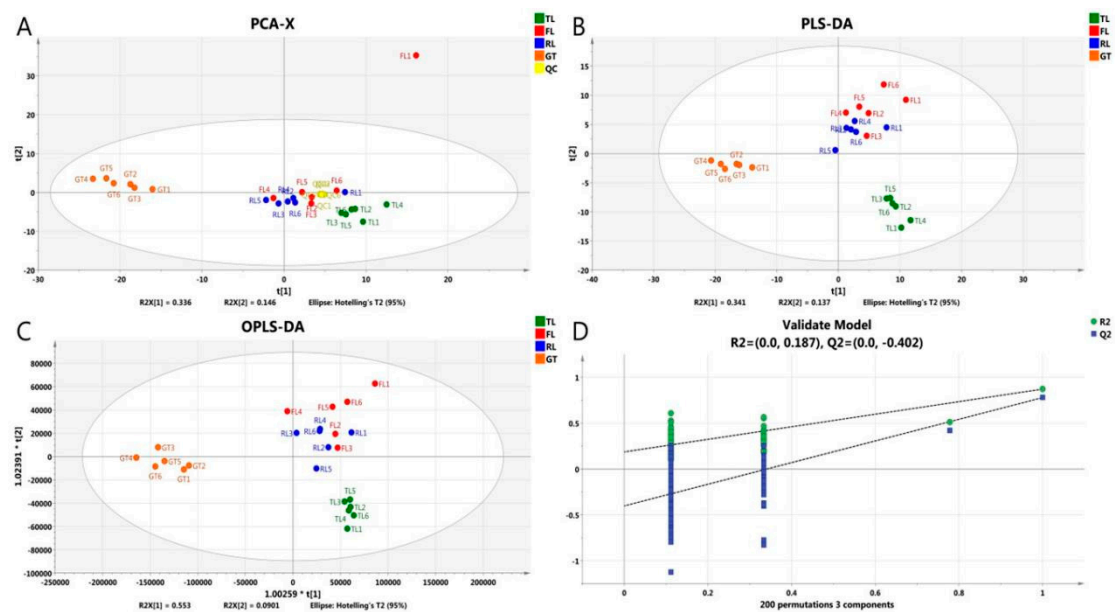

**Figure S3.** Multivariate statistical analyses of Rizhao green tea samples at different processing stages (C18 column, ESI-).

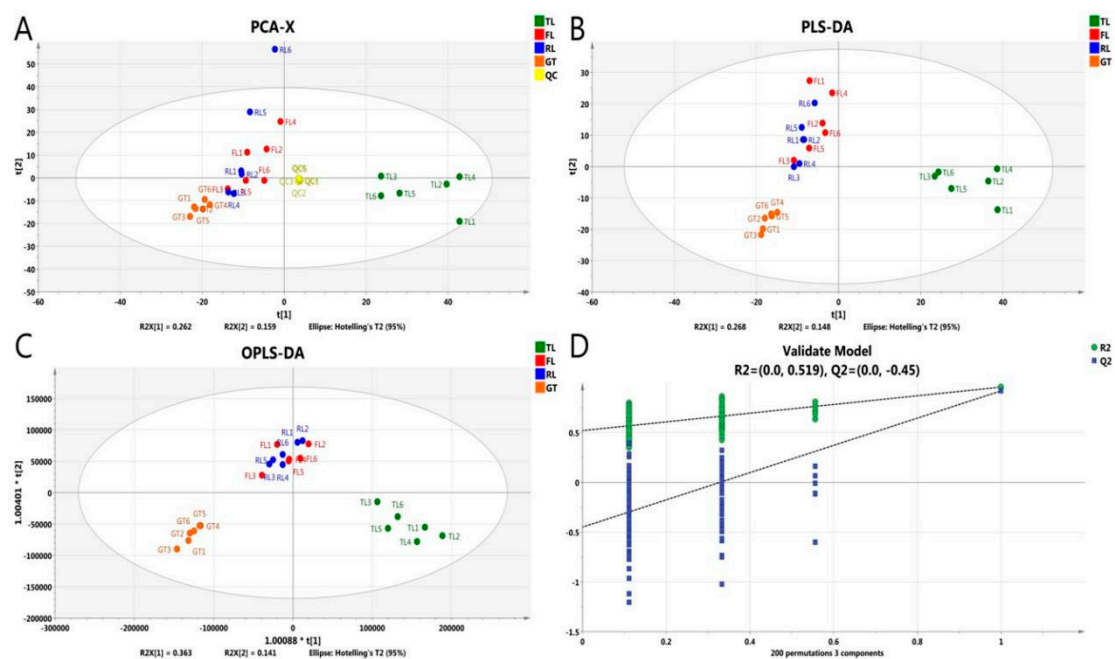

**Figure S4.** Multivariate statistical analyses of Rizhao green tea samples at different processing stages (Hilic column, ESI+).

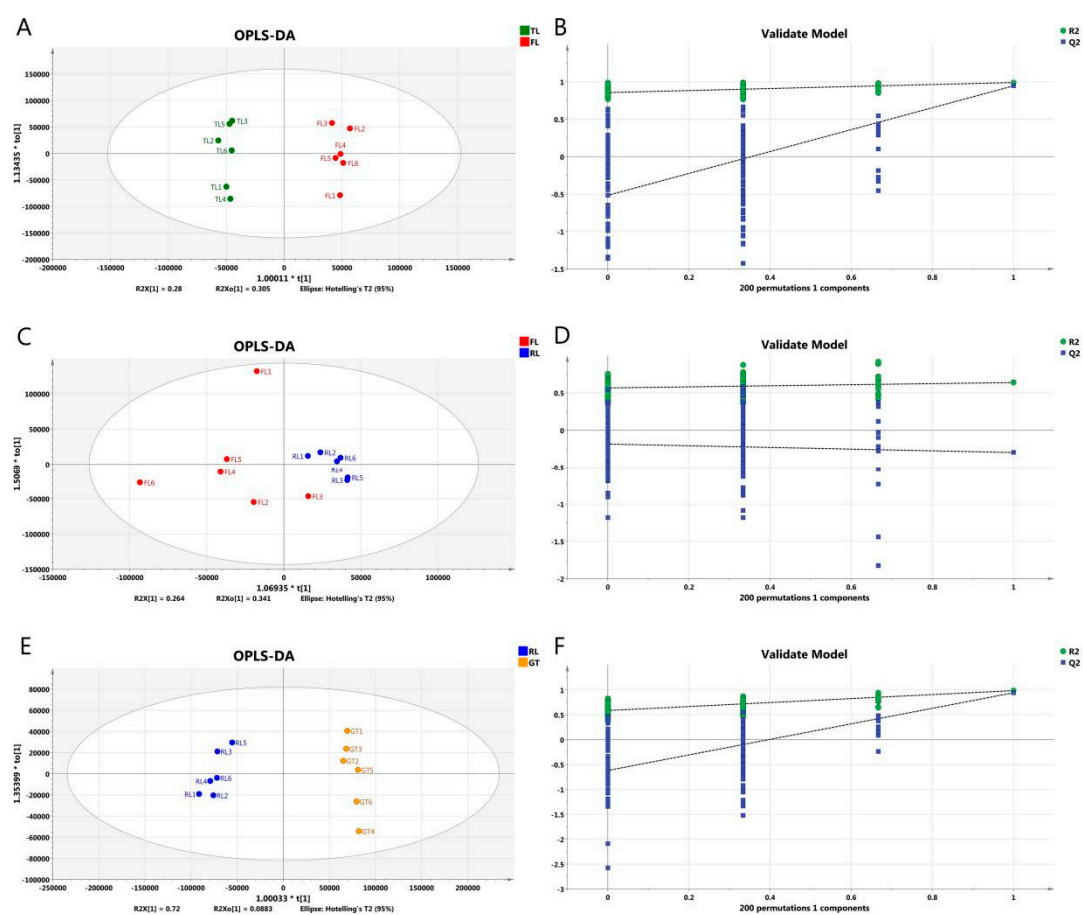

**Figure S5.** OPLS-DA analysis and permutation tests in samples at adjacent processing stages.

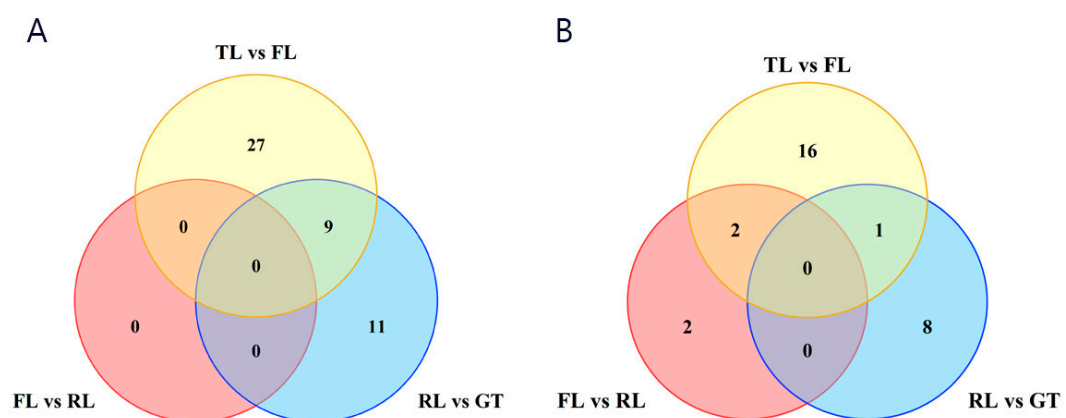

**Figure S6.** Venn diagram of differential metabolites of (A) C18 column in ESI<sup>-</sup> mode (B) Hilic column in ESI<sup>+</sup> mode.

**Table S1.** List of 530 non-volatile metabolites in the processing of Rizhao green tea (ESI+, C18 column).

| NO | Name                                             | Formula                                                       | CAS                       | Molecular Weight (Da) | Annot.Delta Mass (Da) |
|----|--------------------------------------------------|---------------------------------------------------------------|---------------------------|-----------------------|-----------------------|
| 1  | 1-Aminocyclopropanecarboxylic acid               | C <sub>4</sub> H <sub>7</sub> NO <sub>2</sub>                 | 22059-21-8                | 101.05                | -0.00022              |
| 2  | L-beta-Homoserine                                | C <sub>4</sub> H <sub>9</sub> NO <sub>3</sub>                 | 16504-56-6                | 119.06                | -0.00014              |
| 3  | L-Cysteine                                       | C <sub>3</sub> H <sub>7</sub> NO <sub>2</sub> S               | 52-90-4                   | 121.02                | -0.00031              |
| 4  | L-Pyroglutamic acid                              | C <sub>5</sub> H <sub>7</sub> NO <sub>3</sub>                 | 98-79-3                   | 129.04                | -0.00013              |
| 5  | Pipecolic acid                                   | C <sub>6</sub> H <sub>11</sub> NO <sub>2</sub>                | 535-75-1                  | 129.08                | -0.00023              |
| 6  | L-Norleucine                                     | C <sub>6</sub> H <sub>13</sub> NO <sub>2</sub>                | 327-57-1                  | 131.09                | -0.00021              |
| 7  | N,N-Diethylglycine                               | C <sub>6</sub> H <sub>13</sub> NO <sub>2</sub>                | 1606-01-5                 | 131.09                | -0.00021              |
| 8  | Aminocaproic acid                                | C <sub>6</sub> H <sub>13</sub> NO <sub>2</sub>                | 1319-82-0                 | 131.09                | -0.00018              |
| 9  | Allysine                                         | C <sub>6</sub> H <sub>11</sub> NO <sub>3</sub>                | 1962-83-0                 | 145.07                | -0.00015              |
| 10 | Acetylserine                                     | C <sub>5</sub> H <sub>9</sub> NO <sub>4</sub>                 | 16354-58-8                | 147.05                | -0.00024              |
| 11 | 3-Methylcrotonylglycine                          | C <sub>7</sub> H <sub>11</sub> NO <sub>3</sub>                | 33008-07-0                | 157.07                | -0.00034              |
| 12 | L-Phenylalanine                                  | C <sub>9</sub> H <sub>11</sub> NO <sub>2</sub>                | 63-91-2                   | 165.08                | -0.00002              |
| 13 | N-Acetyl-L-leucine                               | C <sub>8</sub> H <sub>15</sub> NO <sub>3</sub>                | 1188-21-2                 | 173.11                | -0.00007              |
| 14 | Boc-Glycine                                      | C <sub>7</sub> H <sub>13</sub> NO <sub>4</sub>                | 4530-20-5                 | 175.08                | -0.00018              |
| 15 | Ethyl methioninate                               | C <sub>7</sub> H <sub>15</sub> NO <sub>2</sub> S              | 452-95-9                  | 177.08                | -0.00003              |
| 16 | DL-Tyrosine                                      | C <sub>9</sub> H <sub>11</sub> NO <sub>3</sub>                | 556-03-6                  | 181.07                | -0.00016              |
| 17 | 1-(Ethoxycarbonyl)proline                        | C <sub>8</sub> H <sub>13</sub> NO <sub>4</sub>                | 5700-74-3                 | 187.08                | -0.00024              |
| 18 | N-Glycyl-L-leucine                               | C <sub>8</sub> H <sub>16</sub> N <sub>2</sub> O <sub>3</sub>  | 869-19-2                  | 188.12                | -0.00051              |
| 19 | Glycyl-L-norleucine                              | C <sub>8</sub> H <sub>16</sub> N <sub>2</sub> O <sub>3</sub>  | 1504-41-2                 | 188.12                | -0.00041              |
| 20 | N-Isopropyl-L-glutamine                          | C <sub>8</sub> H <sub>16</sub> N <sub>2</sub> O <sub>3</sub>  | 4311-12-0                 | 188.12                | -0.00002              |
| 21 | N-Acetyl-L-glutamic acid                         | C <sub>7</sub> H <sub>11</sub> NO <sub>5</sub>                | 1188-37-0                 | 189.06                | 0.00015               |
| 22 | Dihydroxyphenylalanine                           | C <sub>9</sub> H <sub>11</sub> NO <sub>4</sub>                | 59-92-7                   | 197.07                | -0.00022              |
| 23 | N <sup>2</sup> ,N <sup>2</sup> -Diethylglutamine | C <sub>9</sub> H <sub>18</sub> N <sub>2</sub> O <sub>3</sub>  | ChemSpider ID<br>476314   | 202.13                | -0.00025              |
| 24 | Alanylleucine                                    | C <sub>9</sub> H <sub>18</sub> N <sub>2</sub> O <sub>3</sub>  | 1999-42-4                 | 202.13                | -0.00019              |
| 25 | DL-Tryptophan                                    | C <sub>11</sub> H <sub>12</sub> N <sub>2</sub> O <sub>2</sub> | 54-12-6                   | 204.09                | -0.00031              |
| 26 | Cinnamoylglycine                                 | C <sub>11</sub> H <sub>11</sub> NO <sub>3</sub>               | 16534-24-0                | 205.07                | -0.00044              |
| 27 | Val-Pro                                          | C <sub>10</sub> H <sub>18</sub> N <sub>2</sub> O <sub>3</sub> | 20488-27-1                | 214.13                | -0.00019              |
| 28 | 2-Hydroxyoct-7-enoylglycine                      | C <sub>10</sub> H <sub>17</sub> NO <sub>4</sub>               | ChemSpider ID<br>74849653 | 215.12                | -0.00033              |
| 29 | N-(4-Oxobutyl)-L-glutamine                       | C <sub>9</sub> H <sub>16</sub> N <sub>2</sub> O <sub>4</sub>  | ChemSpider ID<br>26332249 | 216.11                | -0.00002              |
| 30 | N-Butyl-4-methylglutamine                        | C <sub>10</sub> H <sub>20</sub> N <sub>2</sub> O <sub>3</sub> | ChemSpider ID<br>492612   | 216.15                | -0.00037              |
| 31 | Val-Val                                          | C <sub>10</sub> H <sub>20</sub> N <sub>2</sub> O <sub>3</sub> | 3918-94-3                 | 216.15                | -0.00031              |
| 32 | Boc-5-Aminopentanoic acid                        | C <sub>10</sub> H <sub>19</sub> NO <sub>4</sub>               | 27219-07-4                | 217.13                | -0.00036              |
| 33 | 5-Hydroxy-DL-tryptophan                          | C <sub>11</sub> H <sub>12</sub> N <sub>2</sub> O <sub>3</sub> | 56-69-9                   | 220.08                | -0.00025              |
| 34 | 4-(Acetylamino)phenylalanine                     | C <sub>11</sub> H <sub>14</sub> N <sub>2</sub> O <sub>3</sub> | 24250-87-1                | 222.10                | -0.00034              |
| 35 | Gly-Phe                                          | C <sub>11</sub> H <sub>14</sub> N <sub>2</sub> O <sub>3</sub> | 721-66-4                  | 222.10                | -0.00003              |

| NO | Name                                            | Formula                                                            | CAS                       | Molecular Weight (Da) | Annot.Delta Mass (Da) |
|----|-------------------------------------------------|--------------------------------------------------------------------|---------------------------|-----------------------|-----------------------|
| 36 | Leu-pro                                         | C <sub>11</sub> H <sub>20</sub> N <sub>2</sub> O <sub>3</sub>      | 6403-35-6                 | 228.15                | -0.00036              |
| 37 | 2,6-Diacetamidohexanoic acid                    | C <sub>10</sub> H <sub>18</sub> N <sub>2</sub> O <sub>4</sub>      | 35436-74-9                | 230.13                | -0.00034              |
| 38 | Leu-Val                                         | C <sub>11</sub> H <sub>22</sub> N <sub>2</sub> O <sub>3</sub>      | 35436-83-0                | 230.16                | -0.00044              |
| 39 | Val-Leu                                         | C <sub>11</sub> H <sub>22</sub> N <sub>2</sub> O <sub>3</sub>      | 22906-55-4                | 230.16                | -0.0004               |
| 40 | Boc-L-Asparagine                                | C <sub>9</sub> H <sub>16</sub> N <sub>2</sub> O <sub>5</sub>       | 7536-55-2                 | 232.11                | -0.00051              |
| 41 | Threonylleucine                                 | C <sub>10</sub> H <sub>20</sub> N <sub>2</sub> O <sub>4</sub>      | 50299-12-2                | 232.14                | -0.00042              |
| 42 | Leucyl-4-hydroxyproline                         | C <sub>11</sub> H <sub>20</sub> N <sub>2</sub> O <sub>4</sub>      | ChemSpider ID<br>20170035 | 244.14                | -0.00045              |
| 43 | Leu-Leu                                         | C <sub>12</sub> H <sub>24</sub> N <sub>2</sub> O <sub>3</sub>      | 3303-31-9                 | 244.18                | -0.00058              |
| 44 | Leu-Gly-Gly                                     | C <sub>10</sub> H <sub>19</sub> N <sub>3</sub> O <sub>4</sub>      | 4337-37-5                 | 245.14                | -0.00045              |
| 45 | Boc-7-Aminoheptanoic acid                       | C <sub>12</sub> H <sub>23</sub> NO <sub>4</sub>                    | 60142-89-4                | 245.16                | -0.00038              |
| 46 | Boc-Lysine                                      | C <sub>11</sub> H <sub>22</sub> N <sub>2</sub> O <sub>4</sub>      | 13734-28-6                | 246.16                | -0.00046              |
| 47 | N(2)-Succinyl-L-glutamic acid                   | C <sub>9</sub> H <sub>13</sub> NO <sub>7</sub>                     | 33981-72-5                | 247.07                | -0.00039              |
| 48 | Ala-Tyr                                         | C <sub>12</sub> H <sub>16</sub> N <sub>2</sub> O <sub>4</sub>      | 3061-88-9                 | 252.11                | -0.00062              |
| 49 | Leu-Gln                                         | C <sub>11</sub> H <sub>21</sub> N <sub>3</sub> O <sub>4</sub>      | ChemSpider ID<br>3511125  | 259.15                | -0.00062              |
| 50 | Lys-Leu                                         | C <sub>12</sub> H <sub>25</sub> N <sub>3</sub> O <sub>3</sub>      | 7369-79-1                 | 259.19                | -0.00061              |
| 51 | alpha-Glutamyl-4-hydroxyproline                 | C <sub>10</sub> H <sub>16</sub> N <sub>2</sub> O <sub>6</sub>      | ChemSpider ID<br>35032069 | 260.10                | -0.00042              |
| 52 | L-gamma-Glutamyl-L-leucine                      | C <sub>11</sub> H <sub>20</sub> N <sub>2</sub> O <sub>5</sub>      | 2566-39-4                 | 260.14                | -0.00052              |
| 53 | Leu-Glu                                         | C <sub>11</sub> H <sub>20</sub> N <sub>2</sub> O <sub>5</sub>      | 16364-31-1                | 260.14                | -0.00051              |
| 54 | Phenylac-gln-OH                                 | C <sub>13</sub> H <sub>16</sub> N <sub>2</sub> O <sub>4</sub>      | 28047-15-6                | 264.11                | -0.0006               |
| 55 | N-Valylphenylalanine                            | C <sub>14</sub> H <sub>20</sub> N <sub>2</sub> O <sub>3</sub>      | 75946-40-6                | 264.15                | -0.00061              |
| 56 | (2S,4S)-Hypoglycin B                            | C <sub>12</sub> H <sub>18</sub> N <sub>2</sub> O <sub>5</sub>      | ChemSpider ID<br>390178   | 270.12                | -0.00067              |
| 57 | gamma-L-Glutamyl-L-glutamic acid                | C <sub>10</sub> H <sub>16</sub> N <sub>2</sub> O <sub>7</sub>      | 1116-22-9                 | 276.10                | -0.00058              |
| 58 | Leu-Phe                                         | C <sub>15</sub> H <sub>22</sub> N <sub>2</sub> O <sub>3</sub>      | 56217-82-4                | 278.16                | -0.00068              |
| 59 | alpha-Asp-Phe                                   | C <sub>13</sub> H <sub>16</sub> N <sub>2</sub> O <sub>5</sub>      | 13433-09-5                | 280.11                | -0.00074              |
| 60 | N6-((Benzoyloxy)carbonyl)lysine                 | C <sub>14</sub> H <sub>20</sub> N <sub>2</sub> O <sub>4</sub>      | 32302-83-3                | 280.14                | -0.00059              |
| 61 | Indoleacetylaspartate                           | C <sub>14</sub> H <sub>14</sub> N <sub>2</sub> O <sub>5</sub>      | 2456-73-7                 | 290.09                | -0.0008               |
| 62 | N-(2-Amino-3-phenylpropanoyl)glutamine          | C <sub>14</sub> H <sub>19</sub> N <sub>3</sub> O <sub>4</sub>      | ChemSpider ID<br>35032821 | 293.14                | -0.00058              |
| 63 | Aspartame                                       | C <sub>14</sub> H <sub>18</sub> N <sub>2</sub> O <sub>5</sub>      | 22839-47-0                | 294.12                | -0.00067              |
| 64 | Leucyltyrosine                                  | C <sub>15</sub> H <sub>22</sub> N <sub>2</sub> O <sub>4</sub>      | 968-21-8                  | 294.16                | -0.00077              |
| 65 | Ile-Tyr                                         | C <sub>15</sub> H <sub>22</sub> N <sub>2</sub> O <sub>4</sub>      | 38579-21-4                | 294.16                | -0.00068              |
| 66 | Nicotianamine                                   | C <sub>12</sub> H <sub>21</sub> N <sub>3</sub> O <sub>6</sub>      | 34441-14-0                | 303.14                | -0.00044              |
| 67 | Tyr-Gln                                         | C <sub>14</sub> H <sub>19</sub> N <sub>3</sub> O <sub>5</sub>      | 28252-40-6                | 309.13                | -0.00083              |
| 68 | N-(tert-Butoxycarbonyl)-4-nitro-L-phenylalanine | C <sub>14</sub> H <sub>18</sub> N <sub>2</sub> O <sub>6</sub>      | 33305-77-0                | 310.12                | -0.00074              |
| 69 | S-Methylglutathione                             | C <sub>11</sub> H <sub>19</sub> N <sub>3</sub> O <sub>6</sub><br>S | 2922-56-7                 | 321.10                | -0.00077              |

| NO  | Name                                   | Formula                                                                       | CAS         | Molecular Weight (Da) | Annot.Delta Mass (Da) |
|-----|----------------------------------------|-------------------------------------------------------------------------------|-------------|-----------------------|-----------------------|
| 70  | (Ac)2-L-Lysyl-D-alanyl-D-alanine       | C <sub>16</sub> H <sub>28</sub> N <sub>4</sub> O <sub>6</sub>                 | 24570-39-6  | 372.20                | -0.00092              |
| 71  | Oxidized glutathione                   | C <sub>20</sub> H <sub>32</sub> N <sub>6</sub> O <sub>12</sub> S <sub>2</sub> | 121-24-4    | 612.15                | -0.00101              |
| 72  | Liquiritigenin                         | C <sub>15</sub> H <sub>12</sub> O <sub>4</sub>                                | 578-86-9    | 256.07                | -0.00064              |
| 73  | Genistein                              | C <sub>15</sub> H <sub>10</sub> O <sub>5</sub>                                | 446-72-0    | 270.05                | -0.00073              |
| 74  | Naringenin chalcone                    | C <sub>15</sub> H <sub>12</sub> O <sub>5</sub>                                | 73692-50-9  | 272.07                | -0.00082              |
| 75  | Naringenin                             | C <sub>15</sub> H <sub>12</sub> O <sub>5</sub>                                | 480-41-1    | 272.07                | -0.00068              |
| 76  | Kaempferol                             | C <sub>15</sub> H <sub>10</sub> O <sub>6</sub>                                | 520-18-3    | 286.05                | -0.00076              |
| 77  | Luteolin                               | C <sub>15</sub> H <sub>10</sub> O <sub>6</sub>                                | 491-70-3    | 286.05                | -0.00072              |
| 78  | Aromadendrin                           | C <sub>15</sub> H <sub>12</sub> O <sub>6</sub>                                | 480-20-6    | 288.06                | -0.00073              |
| 79  | Tetrahydroxyflavanone                  | C <sub>15</sub> H <sub>12</sub> O <sub>6</sub>                                | 20725-03-5  | 288.06                | -0.00071              |
| 80  | Cianidanol                             | C <sub>15</sub> H <sub>14</sub> O <sub>6</sub>                                | 154-23-4    | 290.08                | -0.00077              |
| 81  | Quercetin                              | C <sub>15</sub> H <sub>10</sub> O <sub>7</sub>                                | 117-39-5    | 302.04                | -0.0008               |
| 82  | 3,5,7,2',4'-Pentahydroxyflavone        | C <sub>15</sub> H <sub>10</sub> O <sub>7</sub>                                | 480-16-0    | 302.04                | -0.00079              |
| 83  | 2',3,5,6',7-Pentahydroxyflavanone      | C <sub>15</sub> H <sub>12</sub> O <sub>7</sub>                                | 80366-15-0  | 304.06                | -0.00075              |
| 84  | Myricetin                              | C <sub>15</sub> H <sub>10</sub> O <sub>8</sub>                                | 529-44-2    | 318.04                | -0.00072              |
| 85  | Flavan-3,3',4,4',5,5',7-heptol         | C <sub>15</sub> H <sub>14</sub> O <sub>8</sub>                                | 491-52-1    | 322.07                | -0.00092              |
| 86  | 6-Methoxyquercetin                     | C <sub>16</sub> H <sub>12</sub> O <sub>8</sub>                                | 519-96-0    | 332.05                | -0.00078              |
| 87  | Theogallin                             | C <sub>14</sub> H <sub>16</sub> O <sub>10</sub>                               | 17365-11-6  | 344.07                | -0.00076              |
| 88  | Epiafzelechin 3-O-gallate              | C <sub>22</sub> H <sub>18</sub> O <sub>9</sub>                                | 108907-43-3 | 426.09                | -0.00101              |
| 89  | Isovitexin                             | C <sub>21</sub> H <sub>20</sub> O <sub>10</sub>                               | 29702-25-8  | 432.10                | -0.00106              |
| 90  | Vitexin                                | C <sub>21</sub> H <sub>20</sub> O <sub>10</sub>                               | 3681-93-4   | 432.10                | -0.00096              |
| 91  | Swertianolin                           | C <sub>20</sub> H <sub>20</sub> O <sub>11</sub>                               | 23445-00-3  | 436.10                | -0.00081              |
| 92  | ECG                                    | C <sub>22</sub> H <sub>18</sub> O <sub>10</sub>                               | 1257-08-5   | 442.09                | -0.00129              |
| 93  | Trifolin                               | C <sub>21</sub> H <sub>20</sub> O <sub>11</sub>                               | 23627-87-4  | 448.10                | -0.00117              |
| 94  | EGCG                                   | C <sub>22</sub> H <sub>18</sub> O <sub>11</sub>                               | 989-51-5    | 458.08                | -0.00113              |
| 95  | Quercetin 4'-O-glucoside               | C <sub>21</sub> H <sub>20</sub> O <sub>12</sub>                               | 20229-56-5  | 464.09                | -0.00107              |
| 96  | Quercetin-3β-D-glucoside               | C <sub>21</sub> H <sub>20</sub> O <sub>12</sub>                               | 482-35-9    | 464.09                | -0.00106              |
| 97  | Silandrin                              | C <sub>25</sub> H <sub>22</sub> O <sub>9</sub>                                | 70815-32-6  | 466.13                | -0.00126              |
| 98  | Myricetin 3-galactoside                | C <sub>21</sub> H <sub>20</sub> O <sub>13</sub>                               | 15648-86-9  | 480.09                | -0.00099              |
| 99  | Corymboside                            | C <sub>26</sub> H <sub>28</sub> O <sub>14</sub>                               | 73543-87-0  | 564.15                | -0.00118              |
| 100 | Apigenin-8-C-glucoside                 | C <sub>27</sub> H <sub>30</sub> O <sub>14</sub>                               | 64820-99-1  | 578.16                | -0.00148              |
| 101 | Tiliroside                             | C <sub>30</sub> H <sub>26</sub> O <sub>13</sub>                               | 20316-62-5  | 594.14                | -0.00106              |
| 102 | Kaempferol 3-O-rutinoside              | C <sub>27</sub> H <sub>30</sub> O <sub>15</sub>                               | 17650-84-9  | 594.16                | -0.00145              |
| 103 | Rutin                                  | C <sub>27</sub> H <sub>30</sub> O <sub>16</sub>                               | 153-18-4    | 610.15                | -0.00144              |
| 104 | Quercetin 3-O-Rhamnoside-7-O-glucoside | C <sub>27</sub> H <sub>30</sub> O <sub>16</sub>                               | 17306-45-5  | 610.15                | -0.00137              |
| 105 | Mauritianin                            | C <sub>33</sub> H <sub>40</sub> O <sub>19</sub>                               | 109008-28-8 | 740.21                | -0.0023               |
| 106 | 3,4-Dihydroxybenzaldehyde              | C <sub>7</sub> H <sub>6</sub> O <sub>3</sub>                                  | 139-85-5    | 138.03                | -0.00032              |
| 107 | 4-Hydroxybenzoic acid                  | C <sub>7</sub> H <sub>6</sub> O <sub>3</sub>                                  | 99-96-7     | 138.03                | -0.00027              |
| 108 | Salicylic acid                         | C <sub>7</sub> H <sub>6</sub> O <sub>3</sub>                                  | 69-72-7     | 138.03                | -0.00024              |
| 109 | Protocatechuic acid                    | C <sub>7</sub> H <sub>6</sub> O <sub>4</sub>                                  | 99-50-3     | 154.03                | -0.00026              |

| NO  | Name                                                        | Formula                                         | CAS                       | Molecular Weight (Da) | Annot.Delta Mass (Da) |
|-----|-------------------------------------------------------------|-------------------------------------------------|---------------------------|-----------------------|-----------------------|
| 110 | o-Coumaric acid                                             | C <sub>9</sub> H <sub>8</sub> O <sub>3</sub>    | 614-60-8                  | 164.05                | -0.00035              |
| 111 | 4-Hydroxycinnamic acid                                      | C <sub>9</sub> H <sub>8</sub> O <sub>3</sub>    | 501-98-4                  | 164.05                | -0.0003               |
| 112 | 4-Hydroxyphenylglyoxylic acid                               | C <sub>8</sub> H <sub>6</sub> O <sub>4</sub>    | 15573-67-8                | 166.03                | -0.0002               |
| 113 | 3,4-Dihydroxyphenylacetic acid                              | C <sub>8</sub> H <sub>8</sub> O <sub>4</sub>    | 102-32-9                  | 168.04                | -0.00029              |
| 114 | Gallic acid                                                 | C <sub>7</sub> H <sub>6</sub> O <sub>5</sub>    | 149-91-7                  | 170.02                | -0.00019              |
| 115 | Shikimic acid                                               | C <sub>7</sub> H <sub>10</sub> O <sub>5</sub>   | 138-59-0                  | 174.05                | -0.00037              |
| 116 | Caffeoquinone                                               | C <sub>9</sub> H <sub>6</sub> O <sub>4</sub>    | 15416-77-0                | 178.03                | -0.00038              |
| 117 | 4-Methoxycinnamic acid                                      | C <sub>10</sub> H <sub>10</sub> O <sub>3</sub>  | 830-09-1                  | 178.06                | -0.00019              |
| 118 | Caffeic acid                                                | C <sub>9</sub> H <sub>8</sub> O <sub>4</sub>    | 331-39-5                  | 180.04                | -0.00025              |
| 119 | 2,5-Dihydroxyterephthalic acid                              | C <sub>8</sub> H <sub>6</sub> O <sub>6</sub>    | 610-92-4                  | 198.02                | -0.00031              |
| 120 | Syringic acid                                               | C <sub>9</sub> H <sub>10</sub> O <sub>5</sub>   | 530-57-4                  | 198.05                | -0.00024              |
| 121 | 3-Acetoxycinnamic acid                                      | C <sub>11</sub> H <sub>10</sub> O <sub>4</sub>  | 20375-42-2                | 206.06                | -0.00035              |
|     | Methyl                                                      |                                                 |                           |                       |                       |
| 122 | 3-(2,3-dihydroxy-3-methylbutyl)-4-hydroxybenzoate           | C <sub>13</sub> H <sub>18</sub> O <sub>5</sub>  | 117176-70-2               | 254.11                | -0.0005               |
| 123 | (2R,3S)-trans-Coutaric acid                                 | C <sub>13</sub> H <sub>12</sub> O <sub>8</sub>  | 27174-06-7                | 296.05                | -0.00075              |
| 124 | Caftaric acid                                               | C <sub>13</sub> H <sub>12</sub> O <sub>9</sub>  | 67879-58-7                | 312.05                | -0.00067              |
| 125 | Digallic acid                                               | C <sub>14</sub> H <sub>10</sub> O <sub>9</sub>  | 536-08-3                  | 322.03                | -0.00077              |
| 126 | Coniferyl ferulate                                          | C <sub>20</sub> H <sub>20</sub> O <sub>6</sub>  | 63644-62-2                | 356.13                | -0.00088              |
| 127 | 2-(2-Carboxyethyl)-5-hydroxyphenyl hexopyranosiduronic acid | C <sub>15</sub> H <sub>18</sub> O <sub>10</sub> | ChemSpider ID<br>74886628 | 358.09                | -0.00086              |
| 128 | Sorbic acid                                                 | C <sub>6</sub> H <sub>8</sub> O <sub>2</sub>    | 110-44-1                  | 112.05                | -0.00016              |
| 129 | 7-Octene-3,5-diyn-1-ol                                      | C <sub>8</sub> H <sub>8</sub> O                 | 114020-45-0               | 120.06                | -0.00025              |
| 130 | 9-Oxodecenoic acid                                          | C <sub>10</sub> H <sub>16</sub> O <sub>3</sub>  | 334-20-3                  | 184.11                | -0.00027              |
| 131 | 12-Aminolauric Acid                                         | C <sub>12</sub> H <sub>25</sub> NO <sub>2</sub> | 693-57-2                  | 215.19                | -0.00039              |
| 132 | 12-Hydroxyjasmonic acid                                     | C <sub>12</sub> H <sub>18</sub> O <sub>4</sub>  | 140631-27-2               | 226.12                | -0.00052              |
| 133 | Dodecylethanol amide                                        | C <sub>14</sub> H <sub>29</sub> NO <sub>2</sub> | 142-78-9                  | 243.22                | -0.00044              |
| 134 | Hexadecanamide                                              | C <sub>16</sub> H <sub>33</sub> NO              | 629-54-9                  | 255.26                | -0.00065              |
| 135 | Phloretin                                                   | C <sub>15</sub> H <sub>14</sub> O <sub>5</sub>  | 60-82-2                   | 274.08                | -0.00078              |
| 136 | α-Linolenic acid                                            | C <sub>18</sub> H <sub>30</sub> O <sub>2</sub>  | 463-40-1                  | 278.22                | -0.00063              |
| 137 | Linolenelaidic acid                                         | C <sub>18</sub> H <sub>30</sub> O <sub>2</sub>  | 28290-79-1                | 278.22                | -0.00056              |
| 138 | 12-oxo Phytodienoic acid                                    | C <sub>18</sub> H <sub>28</sub> O <sub>3</sub>  | 85551-10-6                | 292.20                | -0.00079              |
| 139 | Methyl alpha-eleostearate                                   | C <sub>19</sub> H <sub>32</sub> O <sub>2</sub>  | 4175-47-7                 | 292.24                | -0.00076              |
| 140 | 6-Tuliposide B                                              | C <sub>11</sub> H <sub>18</sub> O <sub>9</sub>  | 244105-18-8               | 294.09                | -0.00053              |
| 141 | Tuliposide B                                                | C <sub>11</sub> H <sub>18</sub> O <sub>9</sub>  | 19870-33-8                | 294.09                | -0.00052              |
| 142 | 6-Gingerol                                                  | C <sub>17</sub> H <sub>26</sub> O <sub>4</sub>  | 23513-14-6                | 294.18                | -0.00063              |
| 143 | 9-oxo-10E,12Z-Octadecadienoic acid                          | C <sub>18</sub> H <sub>30</sub> O <sub>3</sub>  | 54232-59-6                | 294.22                | -0.0007               |
| 144 | 9-oxo-10,12-Octadecadienoic acid                            | C <sub>18</sub> H <sub>30</sub> O <sub>3</sub>  | 54232-58-5                | 294.22                | -0.00069              |
| 145 | Ricinelaiddic acid                                          | C <sub>18</sub> H <sub>34</sub> O <sub>3</sub>  | 141-22-0                  | 298.25                | -0.00075              |
| 146 | Palmitoyl ethanolamide                                      | C <sub>18</sub> H <sub>37</sub> NO <sub>2</sub> | 544-31-0                  | 299.28                | -0.00066              |
| 147 | 9-J1-Phytprostane                                           | C <sub>18</sub> H <sub>28</sub> O <sub>4</sub>  | ChemSpider ID             | 308.20                | -0.0008               |

| NO  | Name                                                        | Formula                                                       | CAS                       | Molecular Weight (Da) | Annot.Delta Mass (Da) |
|-----|-------------------------------------------------------------|---------------------------------------------------------------|---------------------------|-----------------------|-----------------------|
|     |                                                             |                                                               | 32033755                  |                       |                       |
| 148 | 8-Gingerol                                                  | C <sub>19</sub> H <sub>30</sub> O <sub>4</sub>                | 23513-08-8                | 322.21                | -0.00089              |
| 149 | Linoleoyl ethanolamide                                      | C <sub>20</sub> H <sub>37</sub> NO <sub>2</sub>               | 68171-52-8                | 323.28                | -0.0007               |
| 150 | Oleoyl ethanolamide                                         | C <sub>20</sub> H <sub>39</sub> NO <sub>2</sub>               | 111-58-0                  | 325.30                | -0.00071              |
| 151 | 10-Nitrooleic acid                                          | C <sub>18</sub> H <sub>33</sub> NO <sub>4</sub>               | 875685-46-4               | 327.24                | -0.00087              |
| 152 | 9-Nitro-9E-octadecenoic acid                                | C <sub>18</sub> H <sub>33</sub> NO <sub>4</sub>               | 875685-44-2               | 327.24                | -0.00074              |
| 153 | Glyceryl palmitate                                          | C <sub>19</sub> H <sub>38</sub> O <sub>4</sub>                | 542-44-9                  | 330.28                | -0.00084              |
| 154 | 9,10,13-Trihydroxyoctadecanoic acid                         | C <sub>18</sub> H <sub>36</sub> O <sub>5</sub>                | ChemSpider ID<br>24022689 | 332.26                | -0.00107              |
| 155 | 3-oxo-N-[(3S)-2-Oxotetrahydro-3-furanyl]hexadecanamide      | C <sub>20</sub> H <sub>35</sub> NO <sub>4</sub>               | 925448-37-9               | 353.26                | -0.00119              |
| 156 | N-Oleoyl Alanine                                            | C <sub>21</sub> H <sub>39</sub> NO <sub>3</sub>               | 745733-78-2               | 353.29                | -0.00098              |
| 157 | (5Z,13E,15R)-15-Hydroxy-16,16-dimethyl-9-oxoprostanoic acid | C <sub>22</sub> H <sub>36</sub> O <sub>4</sub>                | 53658-98-3                | 364.26                | -0.00066              |
| 158 | N-Oleoyl-L-Serine                                           | C <sub>21</sub> H <sub>39</sub> NO <sub>4</sub>               | 1246302-99-7              | 369.29                | -0.001                |
| 159 | Brassicasterol                                              | C <sub>28</sub> H <sub>42</sub> O                             | 516-85-8                  | 394.32                | -0.00086              |
| 160 | Cholesteryl acetate                                         | C <sub>29</sub> H <sub>48</sub> O <sub>2</sub>                | 604-35-3                  | 428.36                | -0.001                |
| 161 | Halosterol B                                                | C <sub>29</sub> H <sub>48</sub> O <sub>2</sub>                | ChemSpider ID<br>9808066  | 428.36                | -0.0007               |
| 162 | 1-Hexadecanoyl-sn-glycero-3-phosphoethanolamine             | C <sub>21</sub> H <sub>44</sub> NO <sub>7</sub> P             | 53862-35-4                | 453.28                | -0.001                |
| 163 | 1-Palmitoylphosphatidylcholine                              | C <sub>24</sub> H <sub>50</sub> NO <sub>7</sub> P             | 17364-18-0                | 495.33                | -0.00119              |
| 164 | Soyacerebroside I                                           | C <sub>40</sub> H <sub>75</sub> NO <sub>9</sub>               | 114297-20-0               | 713.54                | -0.00178              |
| 165 | L-Dilinolenoyl lecithin                                     | C <sub>44</sub> H <sub>76</sub> NO <sub>8</sub> P             | 2701-19-1                 | 777.53                | -0.00168              |
| 166 | Cytosine                                                    | C <sub>4</sub> H <sub>5</sub> N <sub>3</sub> O                | 71-30-7                   | 111.04                | -0.00017              |
| 167 | 5-Formamidopyrimidine                                       | C <sub>5</sub> H <sub>5</sub> N <sub>3</sub> O                | 56621-84-2                | 123.04                | -0.00018              |
| 168 | 5-Methylcytosine                                            | C <sub>5</sub> H <sub>7</sub> N <sub>3</sub> O                | 554-01-8                  | 125.06                | -0.0001               |
| 169 | Thymine                                                     | C <sub>5</sub> H <sub>6</sub> N <sub>2</sub> O <sub>2</sub>   | 65-71-4                   | 126.04                | -0.00028              |
| 170 | Adenine                                                     | C <sub>5</sub> H <sub>5</sub> N <sub>5</sub>                  | 73-24-5                   | 135.05                | -0.00029              |
| 171 | Hypoxanthine                                                | C <sub>5</sub> H <sub>4</sub> N <sub>4</sub> O                | 68-94-0                   | 136.04                | -0.00016              |
| 172 | Guanine                                                     | C <sub>5</sub> H <sub>5</sub> N <sub>5</sub> O                | 73-40-5                   | 151.05                | -0.00018              |
| 173 | 2,6-Diamino-8-azapurine                                     | C <sub>4</sub> H <sub>5</sub> N <sub>7</sub>                  | 18620-97-8                | 151.06                | 0.00016               |
| 174 | Xanthine                                                    | C <sub>5</sub> H <sub>4</sub> N <sub>4</sub> O <sub>2</sub>   | 69-89-6                   | 152.03                | -0.00024              |
| 175 | 1-Methylguanine                                             | C <sub>6</sub> H <sub>7</sub> N <sub>5</sub> O                | 938-85-2                  | 165.06                | -0.0002               |
| 176 | 6-O-Methylguanine                                           | C <sub>6</sub> H <sub>7</sub> N <sub>5</sub> O                | 20535-83-5                | 165.06                | -0.00013              |
| 177 | 1-Methylxanthine                                            | C <sub>6</sub> H <sub>6</sub> N <sub>4</sub> O <sub>2</sub>   | 6136-37-4                 | 166.05                | -0.00027              |
| 178 | 7-Methylxanthine                                            | C <sub>6</sub> H <sub>6</sub> N <sub>4</sub> O <sub>2</sub>   | 552-62-5                  | 166.05                | -0.00026              |
| 179 | trans-Zeatin                                                | C <sub>10</sub> H <sub>13</sub> N <sub>5</sub> O              | 1637-39-4                 | 219.11                | -0.00028              |
| 180 | 5-Methyldeoxycytidine                                       | C <sub>10</sub> H <sub>15</sub> N <sub>3</sub> O <sub>4</sub> | 838-07-3                  | 241.11                | -0.00035              |
| 181 | 1-Pentofuranosyldihydro-2,4(1H,3H)-pyrimidinedione          | C <sub>9</sub> H <sub>14</sub> N <sub>2</sub> O <sub>6</sub>  | 30100-83-5                | 246.08                | -0.00049              |

| NO  | Name                                             | Formula                                                            | CAS         | Molecular Weight (Da) | Annot.Delta Mass (Da) |
|-----|--------------------------------------------------|--------------------------------------------------------------------|-------------|-----------------------|-----------------------|
| 182 | 2'-Deoxyadenosine                                | C <sub>10</sub> H <sub>13</sub> N <sub>5</sub> O <sub>3</sub>      | 958-09-8    | 251.10                | -0.00049              |
| 183 | 1-(beta-D-Ribofuranosyl)-1,4-dihydronicotinamide | C <sub>11</sub> H <sub>16</sub> N <sub>2</sub> O <sub>5</sub>      | 19132-12-8  | 256.11                | -0.00062              |
| 184 | Adenosine                                        | C <sub>10</sub> H <sub>13</sub> N <sub>5</sub> O <sub>4</sub>      | 58-61-7     | 267.10                | -0.00051              |
| 185 | 5'-Amino-5'-oxo-5'-deoxyadenosine                | C <sub>10</sub> H <sub>12</sub> N <sub>6</sub> O <sub>4</sub>      | 35788-21-7  | 280.09                | -0.00059              |
| 186 | 1-Methyladenosine                                | C <sub>11</sub> H <sub>15</sub> N <sub>5</sub> O <sub>4</sub>      | 15763-06-1  | 281.11                | -0.00054              |
| 187 | 2'-O-Methyladenosine                             | C <sub>11</sub> H <sub>15</sub> N <sub>5</sub> O <sub>4</sub>      | 2140-79-6   | 281.11                | -0.00053              |
| 188 | Guanosine                                        | C <sub>10</sub> H <sub>13</sub> N <sub>5</sub> O <sub>5</sub>      | 118-00-3    | 283.09                | -0.00059              |
| 189 | N6,N6-Dimethyladenosine                          | C <sub>12</sub> H <sub>17</sub> N <sub>5</sub> O <sub>4</sub>      | 2620-62-4   | 295.13                | -0.00047              |
| 190 | 5'-S-Methyl-5'-thioadenosine                     | C <sub>11</sub> H <sub>15</sub> N <sub>5</sub> O <sub>3</sub><br>S | 2457-80-9   | 297.09                | -0.00063              |
| 191 | 7-Methylguanosine                                | C <sub>11</sub> H <sub>15</sub> N <sub>5</sub> O <sub>5</sub>      | 20244-86-4  | 297.11                | -0.0007               |
| 192 | N2,N2-Dimethylguanosine                          | C <sub>12</sub> H <sub>17</sub> N <sub>5</sub> O <sub>5</sub>      | 2140-67-2   | 311.12                | -0.00067              |
| 193 | Adenosine-3'-5'-cyclic monophosphate             | C <sub>10</sub> H <sub>12</sub> N <sub>5</sub> O <sub>6</sub><br>P | 86594-35-6  | 329.05                | -0.00058              |
| 194 | Hypoxanthine deoxyriboside                       | C <sub>10</sub> H <sub>13</sub> N <sub>4</sub> O <sub>7</sub><br>P | 3393-18-8   | 332.05                | 0.00028               |
| 195 | Cyclic guanosine monophosphate                   | C <sub>10</sub> H <sub>12</sub> N <sub>5</sub> O <sub>7</sub><br>P | 7665-99-8   | 345.05                | -0.00062              |
| 196 | 9-Ribosylzeatin                                  | C <sub>15</sub> H <sub>21</sub> N <sub>5</sub> O <sub>5</sub>      | 15896-46-5  | 351.15                | -0.00066              |
| 197 | N6-Succinyl adenosine                            | C <sub>14</sub> H <sub>17</sub> N <sub>5</sub> O <sub>8</sub>      | 4542-23-8   | 383.11                | -0.00104              |
| 198 | Glutaric anhydride                               | C <sub>5</sub> H <sub>6</sub> O <sub>3</sub>                       | 108-55-4    | 114.03                | -0.0003               |
| 199 | Levulinic acid                                   | C <sub>5</sub> H <sub>8</sub> O <sub>3</sub>                       | 123-76-2    | 116.05                | -0.00009              |
| 200 | (2-Aminoethyl)phosphonic acid                    | C <sub>2</sub> H <sub>8</sub> NO <sub>3</sub> P                    | 2041-14-7   | 125.02                | -0.00048              |
| 201 | (2S)-2-Amino-4-hexynoic acid                     | C <sub>6</sub> H <sub>9</sub> NO <sub>2</sub>                      | 29834-76-2  | 127.06                | -0.00019              |
| 202 | 1,2,5,6-Tetrahydropyridine-3-carboxylic acid     | C <sub>6</sub> H <sub>9</sub> NO <sub>2</sub>                      | 498-96-4    | 127.06                | -0.00016              |
| 203 | 6-Methylnicotinic acid                           | C <sub>7</sub> H <sub>7</sub> NO <sub>2</sub>                      | 3222-47-7   | 137.05                | -0.00015              |
| 204 | 6-oxo-Pipecolinic acid                           | C <sub>6</sub> H <sub>9</sub> NO <sub>3</sub>                      | 3770-22-7   | 143.06                | -0.00001              |
| 205 | Tetrahydro-5-oxo-2-furanacetic acid              | C <sub>6</sub> H <sub>8</sub> O <sub>4</sub>                       | 60551-20-4  | 144.04                | -0.00004              |
| 206 | 4-Acetamidobutyric acid                          | C <sub>6</sub> H <sub>11</sub> NO <sub>3</sub>                     | 3025-96-5   | 145.07                | -0.0001               |
| 207 | 2-Hydroxyglutaric acid                           | C <sub>5</sub> H <sub>8</sub> O <sub>5</sub>                       | 2889-31-8   | 148.04                | 0.00011               |
| 208 | (2Z)-8-Hydroxy-2-octene-4,6-diyonic acid         | C <sub>8</sub> H <sub>6</sub> O <sub>3</sub>                       | 65367-65-9  | 150.03                | -0.00026              |
| 209 | 5-Aminosalicylic acid                            | C <sub>7</sub> H <sub>7</sub> NO <sub>3</sub>                      | 89-57-6     | 153.04                | -0.00023              |
| 210 | 2-Hydrazinonicotinic acid                        | C <sub>6</sub> H <sub>7</sub> N <sub>3</sub> O <sub>2</sub>        | 435342-14-6 | 153.05                | -0.00018              |
| 211 | Dimethyl itaconate                               | C <sub>7</sub> H <sub>10</sub> O <sub>4</sub>                      | 617-52-7    | 158.06                | -0.00025              |
| 212 | Phenylbutyric acid                               | C <sub>10</sub> H <sub>12</sub> O <sub>2</sub>                     | 1821-12-1   | 164.08                | -0.00028              |
| 213 | D-Xylonic acid                                   | C <sub>5</sub> H <sub>10</sub> O <sub>6</sub>                      | 4172-43-4   | 166.05                | 0.00016               |
| 214 | Acetylsalicylic acid                             | C <sub>9</sub> H <sub>8</sub> O <sub>4</sub>                       | 50-78-2     | 180.04                | -0.00023              |

| NO  | Name                                                      | Formula                                                       | CAS                      | Molecular Weight (Da) | Annot.Delta Mass (Da) |
|-----|-----------------------------------------------------------|---------------------------------------------------------------|--------------------------|-----------------------|-----------------------|
| 215 | 5-Hydroxyisophthalic acid                                 | C <sub>8</sub> H <sub>6</sub> O <sub>5</sub>                  | 618-83-7                 | 182.02                | -0.00024              |
| 216 | Stipitatic acid                                           | C <sub>8</sub> H <sub>6</sub> O <sub>5</sub>                  | 4440-39-5                | 182.02                | -0.00024              |
| 217 | trans-3-Indoleacrylic acid                                | C <sub>11</sub> H <sub>9</sub> NO <sub>2</sub>                | 29953-71-7               | 187.06                | -0.00029              |
| 218 | 1-(Carboxymethyl)piperidine-4-carboxylic acid             | C <sub>8</sub> H <sub>13</sub> NO <sub>4</sub>                | 53919-19-0               | 187.08                | -0.00027              |
| 219 | 4-Hydroxyquinoline-2-carboxylic acid                      | C <sub>10</sub> H <sub>7</sub> NO <sub>3</sub>                | 492-27-3                 | 189.04                | -0.00032              |
| 220 | 3-(4-Methylbenzoyl)acrylic acid                           | C <sub>11</sub> H <sub>10</sub> O <sub>3</sub>                | 20972-36-5               | 190.06                | -0.00025              |
| 221 | 4-(Trifluoromethyl)nicotinic acid                         | C <sub>7</sub> H <sub>4</sub> F <sub>3</sub> NO <sub>2</sub>  | 158063-66-2              | 191.02                | -0.00037              |
| 222 | 5-Hydroxyindole-3-acetic acid                             | C <sub>10</sub> H <sub>9</sub> NO <sub>3</sub>                | 1321-73-9                | 191.06                | -0.00024              |
| 223 | 3-Oxooctahydro-4a(2H)-naphthalenecarboxylic acid          | C <sub>11</sub> H <sub>16</sub> O <sub>3</sub>                | 91352-51-1               | 196.11                | -0.00033              |
| 224 | Vanillyl mandelic acid                                    | C <sub>9</sub> H <sub>10</sub> O <sub>5</sub>                 | 55-10-7                  | 198.05                | -0.00028              |
| 225 | (2E)-3-(3,4-Dimethoxyphenyl)acrylic acid                  | C <sub>11</sub> H <sub>12</sub> O <sub>4</sub>                | 14737-89-4               | 208.07                | -0.00035              |
| 226 | 4-[(Ethoxycarbonyl)amino]benzoic acid                     | C <sub>10</sub> H <sub>11</sub> NO <sub>4</sub>               | 5180-75-6                | 209.07                | -0.00041              |
| 227 | Jasmonic acid                                             | C <sub>12</sub> H <sub>18</sub> O <sub>3</sub>                | 6894-38-8                | 210.13                | -0.00038              |
| 228 | 2-Hydroxy-6-ketononadienedioic acid                       | C <sub>9</sub> H <sub>10</sub> O <sub>6</sub>                 | ChemSpider ID<br>4444276 | 214.05                | -0.00039              |
| 229 | Diphenylphosphinic acid                                   | C <sub>12</sub> H <sub>11</sub> O <sub>2</sub> P              | 1707-03-5                | 218.05                | -0.00043              |
| 230 | 4,5-Dimethoxy-2-nitrobenzoic acid                         | C <sub>9</sub> H <sub>9</sub> NO <sub>6</sub>                 | 4998-07-6                | 227.04                | -0.00046              |
| 231 | Dimethyl succinylsuccinate                                | C <sub>10</sub> H <sub>12</sub> O <sub>6</sub>                | 6289-46-9                | 228.06                | -0.00034              |
| 232 | Hopantenic acid                                           | C <sub>10</sub> H <sub>19</sub> NO <sub>5</sub>               | 18679-90-8               | 233.13                | -0.00056              |
| 233 | 3-Amino-3-(4-isopropoxy-3-methoxyphenyl)propanoic acid    | C <sub>13</sub> H <sub>19</sub> NO <sub>4</sub>               | 554402-59-4              | 253.13                | -0.00049              |
| 234 | 3,4,5-Triethoxybenzoic acid                               | C <sub>13</sub> H <sub>18</sub> O <sub>5</sub>                | 6970-19-0                | 254.11                | -0.00065              |
| 235 | 10-Heptadecen-8-ynoic acid                                | C <sub>17</sub> H <sub>28</sub> O <sub>2</sub>                | 16714-84-4               | 264.21                | -0.00078              |
| 236 | 4-[2-(4-Amino-4-carboxybutanoyl)hydrazino]benzoic acid    | C <sub>12</sub> H <sub>15</sub> N <sub>3</sub> O <sub>5</sub> | 69644-85-5               | 281.10                | -0.0009               |
| 237 | N-Succinyl-L-diaminopimelic acid                          | C <sub>11</sub> H <sub>18</sub> N <sub>2</sub> O <sub>7</sub> | 26605-36-7               | 290.11                | -0.00055              |
| 238 | (9Z,11E,13S,15Z)-13-Hydroxyoctadeca-9,11,15-trienoic acid | C <sub>18</sub> H <sub>30</sub> O <sub>3</sub>                | 87984-82-5               | 294.22                | -0.00071              |
| 239 | 2'-Deoxymugineic acid                                     | C <sub>12</sub> H <sub>20</sub> N <sub>2</sub> O <sub>7</sub> | 74235-24-8               | 304.13                | -0.00042              |
| 240 | Imazamox                                                  | C <sub>15</sub> H <sub>19</sub> N <sub>3</sub> O <sub>4</sub> | 114311-32-9              | 305.14                | -0.00094              |
| 241 | (9Z,11E)-13-Hydroperoxyoctadeca-9,11-dienoic acid         | C <sub>18</sub> H <sub>32</sub> O <sub>4</sub>                | 23017-93-8               | 312.23                | -0.00092              |
| 242 | Salicylacyl glucuronide                                   | C <sub>13</sub> H <sub>14</sub> O <sub>9</sub>                | 29315-53-5               | 314.06                | -0.00085              |
| 243 | Luteic acid                                               | C <sub>14</sub> H <sub>8</sub> O <sub>9</sub>                 | 476-67-5                 | 320.02                | -0.00059              |
| 244 | Ethylenediamine-N,N'-diacetic-N,N'-dipropionic acid       | C <sub>12</sub> H <sub>20</sub> N <sub>2</sub> O <sub>8</sub> | 32701-19-2               | 320.12                | -0.00057              |
| 245 | (2R,9Z,12E,15Z)-2-Hydroperoxy-1                           | C <sub>18</sub> H <sub>30</sub> O <sub>5</sub>                | ChemSpider ID            | 326.21                | -0.00071              |

| NO  | Name                                                                    | Formula                                                       | CAS                       | Molecular Weight (Da) | Annot.Delta Mass (Da) |
|-----|-------------------------------------------------------------------------|---------------------------------------------------------------|---------------------------|-----------------------|-----------------------|
|     | 3-hydroxy-9,12,15-octadecatrienoic acid                                 |                                                               | 17220740                  |                       |                       |
| 246 | (2R)-2-[(7Z)-7-Hexadecen-1-yl]-3-methylenesuccinic acid                 | C <sub>21</sub> H <sub>36</sub> O <sub>4</sub>                | ChemSpider ID<br>29328054 | 352.26                | -0.00078              |
| 247 | Oxindole                                                                | C <sub>8</sub> H <sub>7</sub> NO                              | 59-48-3                   | 133.05                | -0.00017              |
| 248 | Stachydrine                                                             | C <sub>7</sub> H <sub>13</sub> NO <sub>2</sub>                | ChemSpider ID<br>103115   | 143.09                | -0.0001               |
| 249 | Daechualkaloid A                                                        | C <sub>10</sub> H <sub>13</sub> NO <sub>2</sub>               | 80933-73-9                | 179.09                | -0.00019              |
| 250 | Theobromine                                                             | C <sub>7</sub> H <sub>8</sub> N <sub>4</sub> O <sub>2</sub>   | 83-67-0                   | 180.06                | -0.00036              |
| 251 | Theophylline                                                            | C <sub>7</sub> H <sub>8</sub> N <sub>4</sub> O <sub>2</sub>   | 58-55-9                   | 180.06                | -0.00033              |
| 252 | Caffeine                                                                | C <sub>8</sub> H <sub>10</sub> N <sub>4</sub> O <sub>2</sub>  | 58-08-2                   | 194.08                | -0.00035              |
| 253 | 6-Thiocaffeine                                                          | C <sub>8</sub> H <sub>10</sub> N <sub>4</sub> OS              | 13182-58-6                | 210.06                | -0.00029              |
| 254 | N,N-Dimethyl-5-methoxytryptamine                                        | C <sub>13</sub> H <sub>18</sub> N <sub>2</sub> O              | 1019-45-0                 | 218.14                | -0.00057              |
| 255 | Eseroline                                                               | C <sub>13</sub> H <sub>18</sub> N <sub>2</sub> O              | 469-22-7                  | 218.14                | -0.00045              |
| 256 | Gentisein                                                               | C <sub>13</sub> H <sub>8</sub> O <sub>5</sub>                 | 529-49-7                  | 244.04                | -0.00057              |
| 257 | Echinatine N-oxide                                                      | C <sub>15</sub> H <sub>25</sub> NO <sub>6</sub>               | 20267-93-0                | 315.17                | -0.00079              |
| 258 | Renardine                                                               | C <sub>19</sub> H <sub>27</sub> NO <sub>6</sub>               | 2318-18-5                 | 365.18                | -0.00072              |
| 259 | Jervine                                                                 | C <sub>27</sub> H <sub>39</sub> NO <sub>3</sub>               | 469-59-0                  | 425.29                | -0.00105              |
| 260 | Methyl gallate                                                          | C <sub>8</sub> H <sub>8</sub> O <sub>5</sub>                  | 99-24-1                   | 184.04                | -0.00028              |
| 261 | Ellagic acid                                                            | C <sub>14</sub> H <sub>6</sub> O <sub>8</sub>                 | 476-66-4                  | 302.01                | -0.00075              |
| 262 | Procyanidin A2                                                          | C <sub>30</sub> H <sub>24</sub> O <sub>12</sub>               | 41743-41-3                | 576.13                | -0.00136              |
| 263 | Procyanidin B2                                                          | C <sub>30</sub> H <sub>26</sub> O <sub>12</sub>               | 29106-49-8                | 578.14                | -0.00112              |
| 264 | Galactosamine                                                           | C <sub>6</sub> H <sub>13</sub> NO <sub>5</sub>                | 7535-00-4                 | 179.08                | -0.00019              |
| 265 | 2-Acetamido-2,6-dideoxyglucose                                          | C <sub>8</sub> H <sub>15</sub> NO <sub>5</sub>                | 40614-71-9                | 205.09                | -0.00012              |
| 266 | 2,4-Diacetamido-2,4,6-trideoxy-alpha-D-mannopyranose Methyl             | C <sub>10</sub> H <sub>18</sub> N <sub>2</sub> O <sub>5</sub> | ChemSpider ID<br>28533246 | 246.12                | -0.00035              |
| 267 | 4,6-dideoxy-4-[(3-hydroxypropano-yl)amino]hexopyranoside                | C <sub>10</sub> H <sub>19</sub> NO <sub>6</sub>               | ChemSpider ID<br>4928260  | 249.12                | -0.00034              |
| 268 | 1-O-Benzoylpentopyranose                                                | C <sub>12</sub> H <sub>14</sub> O <sub>6</sub>                | ChemSpider ID<br>495245   | 254.08                | -0.00062              |
| 269 | (2S)-2-(beta-D-Glucopyranosyloxy)-3-methyl-3-butenenitrile              | C <sub>11</sub> H <sub>17</sub> NO <sub>6</sub>               | 66871-89-4                | 259.11                | -0.00046              |
| 270 | 2(R)-Hydroxy-2-methylbutyronitrile-beta-D-glucopyranoside               | C <sub>11</sub> H <sub>19</sub> NO <sub>6</sub>               | 534-67-8                  | 261.12                | -0.00041              |
| 271 | 1-Deoxy-1-(hexylamino)hexitol                                           | C <sub>12</sub> H <sub>27</sub> NO <sub>5</sub>               | ChemSpider ID<br>499954   | 265.19                | -0.0004               |
| 272 | (1S,5R)-5-Isopropenyl-2-methyl-2-cyclohexen-1-yl-beta-D-glucopyranoside | C <sub>16</sub> H <sub>26</sub> O <sub>6</sub>                | 113349-30-7               | 314.17                | -0.00056              |
| 273 | Methyl                                                                  | C <sub>17</sub> H <sub>24</sub> N <sub>2</sub> O <sub>8</sub> | ChemSpider ID             | 384.15                | -0.00118              |

| NO  | Name                                                                                                                 | Formula                                                        | CAS                      | Molecular Weight (Da) | Annot.Delta Mass (Da) |
|-----|----------------------------------------------------------------------------------------------------------------------|----------------------------------------------------------------|--------------------------|-----------------------|-----------------------|
|     | 2-[[{[(benzyloxy)carbonyl]amino}acetyl)amino]-2-deoxyhexopyranoside                                                  |                                                                | 511388                   |                       |                       |
| 274 | 6-Acetamido-1,2,3,4-tetra-O-acetyl-6-deoxyhexopyranose                                                               | C <sub>16</sub> H <sub>23</sub> NO <sub>10</sub>               | ChemSpider ID<br>510192  | 389.13                | -0.00082              |
| 275 | (2S)-2-{[6-O-(alpha-L-Arabinopyranosyl)-beta-D-glucopyranosyl]oxy}-3-methyl-3-butenenitrile                          | C <sub>16</sub> H <sub>25</sub> NO <sub>10</sub>               | 79197-21-0               | 391.15                | -0.00083              |
| 276 | 4-O-(2-Acetamido-2-deoxy-beta-D-glucopyranosyl)-beta-D-glucopyranuronic acid                                         | C <sub>14</sub> H <sub>23</sub> NO <sub>12</sub>               | 139626-60-1              | 397.12                | -0.00098              |
| 277 | 1,3,4,6-Tetra-O-acetyl-2-deoxy-2-(1-pyrrolidinyl)hexopyranose                                                        | C <sub>18</sub> H <sub>27</sub> NO <sub>9</sub>                | ChemSpider ID<br>499689  | 401.17                | -0.00108              |
| 278 | Methyl 2-acetamido-2-deoxy-3,6-di-O-methyl-4-O-(2,3,4,6-tetra-O-methyl-beta-D-mannopyranosyl)-beta-D-glucopyranoside | C <sub>21</sub> H <sub>39</sub> NO <sub>11</sub>               | ChemSpider ID<br>4933246 | 481.25                | -0.00112              |
| 279 | Glucosylgalactosyl hydroxylysine                                                                                     | C <sub>18</sub> H <sub>34</sub> N <sub>2</sub> O <sub>13</sub> | ChemSpider ID<br>109059  | 486.21                | 0.00062               |
| 280 | 2,3,4,6-Tetra-O-acetyl-1-O-[(2E)-3-(3,4-diacetoxyphenyl)-2-propenoyl]hexopyranose                                    | C <sub>27</sub> H <sub>30</sub> O <sub>15</sub>                | ChemSpider ID<br>4524029 | 594.16                | -0.00138              |
| 281 | Pulegone                                                                                                             | C <sub>10</sub> H <sub>16</sub> O                              | 15932-80-6               | 152.12                | -0.00024              |
| 282 | Zerumbone                                                                                                            | C <sub>15</sub> H <sub>22</sub> O                              | 471-05-6                 | 218.17                | -0.00029              |
| 283 | Caryophyllene oxide                                                                                                  | C <sub>15</sub> H <sub>24</sub> O                              | 1139-30-6                | 220.18                | -0.00041              |
| 284 | Podolide                                                                                                             | C <sub>19</sub> H <sub>22</sub> O <sub>5</sub>                 | 55786-36-2               | 330.15                | -0.00094              |
| 285 | Gibberellin A7                                                                                                       | C <sub>19</sub> H <sub>22</sub> O <sub>5</sub>                 | 510-75-8                 | 330.15                | -0.00075              |
| 286 | Geniposide pentaacetate                                                                                              | C <sub>27</sub> H <sub>34</sub> O <sub>15</sub>                | 49776-64-9               | 598.19                | -0.00173              |
| 287 | Coumarin                                                                                                             | C <sub>9</sub> H <sub>6</sub> O <sub>2</sub>                   | 91-64-5                  | 146.04                | -0.00033              |
| 288 | 8-Methylcoumarin                                                                                                     | C <sub>10</sub> H <sub>8</sub> O <sub>2</sub>                  | 1807-36-9                | 160.05                | 0.00014               |
| 289 | 4-Hydroxycoumarin                                                                                                    | C <sub>9</sub> H <sub>6</sub> O <sub>3</sub>                   | 1076-38-6                | 162.03                | -0.0003               |
| 290 | 7-Hydroxycoumarine                                                                                                   | C <sub>9</sub> H <sub>6</sub> O <sub>3</sub>                   | 93-35-6                  | 162.03                | -0.0003               |
| 291 | Hymecromone                                                                                                          | C <sub>10</sub> H <sub>8</sub> O <sub>3</sub>                  | 90-33-5                  | 176.05                | -0.00038              |
| 292 | Esculetin                                                                                                            | C <sub>9</sub> H <sub>6</sub> O <sub>4</sub>                   | 305-01-1                 | 178.03                | -0.00038              |
| 293 | 6-Acetocoumarin                                                                                                      | C <sub>11</sub> H <sub>8</sub> O <sub>3</sub>                  | 1177917-22-4             | 188.05                | -0.00039              |
| 294 | 4,5,7-Trihydroxycoumarin                                                                                             | C <sub>9</sub> H <sub>6</sub> O <sub>5</sub>                   | 17575-26-7               | 194.02                | -0.00022              |
| 295 | Scoparone                                                                                                            | C <sub>11</sub> H <sub>10</sub> O <sub>4</sub>                 | 120-08-1                 | 206.06                | -0.00034              |
| 296 | Methoxsalen                                                                                                          | C <sub>12</sub> H <sub>8</sub> O <sub>4</sub>                  | 298-81-7                 | 216.04                | -0.00032              |
| 297 | 7-Acetoxy-4-methylcoumarin                                                                                           | C <sub>12</sub> H <sub>10</sub> O <sub>4</sub>                 | 2747-05-9                | 218.06                | -0.00029              |
| 298 | 8-Acetyl-7-hydroxy-4-methylcoumarin                                                                                  | C <sub>12</sub> H <sub>10</sub> O <sub>4</sub>                 | 2555-29-5                | 218.06                | -0.00029              |

| NO  | Name                                    | Formula                                                     | CAS                     | Molecular Weight (Da) | Annot.Delta Mass (Da) |
|-----|-----------------------------------------|-------------------------------------------------------------|-------------------------|-----------------------|-----------------------|
| 299 | Urolithin D                             | C <sub>13</sub> H <sub>8</sub> O <sub>6</sub>               | 131086-98-1             | 260.03                | -0.00045              |
| 300 | (+)-Galbacin                            | C <sub>20</sub> H <sub>20</sub> O <sub>5</sub>              | 528-64-3                | 340.13                | -0.00075              |
| 301 | 1,4-Cyclohexadiene                      | C <sub>6</sub> H <sub>8</sub>                               | 628-41-1                | 80.06                 | -0.00017              |
| 302 | Cyclohexene                             | C <sub>6</sub> H <sub>10</sub>                              | 110-83-8                | 82.08                 | -0.00026              |
| 303 | Methyl propiolate                       | C <sub>4</sub> H <sub>4</sub> O <sub>2</sub>                | 922-67-8                | 84.02                 | -0.00019              |
| 304 | 2-Pyrrolidone                           | C <sub>4</sub> H <sub>7</sub> NO                            | 616-45-5                | 85.05                 | -0.00017              |
| 305 | 4-Penten-1-amine                        | C <sub>5</sub> H <sub>11</sub> N                            | 22537-07-1              | 85.09                 | -0.00013              |
| 306 | Ethyl isothiocyanate                    | C <sub>3</sub> H <sub>5</sub> NS                            | 542-85-8                | 87.01                 | -0.00018              |
| 307 | N,N-Dimethylacetamide                   | C <sub>4</sub> H <sub>9</sub> NO                            | 127-19-5                | 87.07                 | -0.00014              |
| 308 | 1-Heptyne                               | C <sub>7</sub> H <sub>12</sub>                              | 628-71-7                | 96.09                 | -0.0002               |
| 309 | Cyclopentan-1,3-dione                   | C <sub>5</sub> H <sub>6</sub> O <sub>2</sub>                | 3859-41-4               | 98.04                 | -0.00027              |
| 310 | Phenylacetylene                         | C <sub>8</sub> H <sub>6</sub>                               | 536-74-3                | 102.05                | -0.00015              |
| 311 | (E)-1-Phenylmethanimine                 | C <sub>7</sub> H <sub>7</sub> N                             | ChemSpider ID<br>378751 | 105.06                | -0.00011              |
| 312 | (2E,4E)-2,4-Heptadien-6-ynal            | C <sub>7</sub> H <sub>6</sub> O                             | 7200-04-6               | 106.04                | -0.0002               |
| 313 | Benzoquinone                            | C <sub>6</sub> H <sub>4</sub> O <sub>2</sub>                | 106-51-4                | 108.02                | -0.00021              |
| 314 | alpha-Ocimene                           | C <sub>8</sub> H <sub>12</sub>                              | 1002-35-3               | 108.09                | -0.00015              |
| 315 | Hydroquinone                            | C <sub>6</sub> H <sub>6</sub> O <sub>2</sub>                | 123-31-9                | 110.04                | -0.00022              |
| 316 | Diacetylene glycol                      | C <sub>6</sub> H <sub>6</sub> O <sub>2</sub>                | 3031-68-3               | 110.04                | -0.00018              |
| 317 | 3,5-Dimethyl-1,4-hexadiene              | C <sub>8</sub> H <sub>14</sub>                              | 761-87-5                | 110.11                | -0.00024              |
| 318 | 1-Vinyl-2-pyrrolidone                   | C <sub>6</sub> H <sub>9</sub> NO                            | 88-12-0                 | 111.07                | -0.00019              |
| 319 | N,N-Dimethyl-2-butyramide               | C <sub>6</sub> H <sub>9</sub> NO                            | 53099-32-4              | 111.07                | -0.00015              |
| 320 | 1-Aminopyrrole-2,5-dione                | C <sub>4</sub> H <sub>4</sub> N <sub>2</sub> O <sub>2</sub> | 37770-94-8              | 112.03                | -0.00021              |
| 321 | 5-Methyl-3-methylidene-oxolan-2-one     | C <sub>6</sub> H <sub>8</sub> O <sub>2</sub>                | 62873-16-9              | 112.05                | -0.0002               |
| 322 | N-Acetylpyrrolidine                     | C <sub>6</sub> H <sub>11</sub> NO                           | 4030-18-6               | 113.08                | -0.0002               |
| 323 | N,N-Dimethyl-2-butenamide               | C <sub>6</sub> H <sub>11</sub> NO                           | 14064-75-6              | 113.08                | -0.00015              |
| 324 | Butyl isothiocyanate                    | C <sub>5</sub> H <sub>9</sub> NS                            | 592-82-5                | 115.05                | -0.00018              |
| 325 | 3-Acetamidopropanal                     | C <sub>5</sub> H <sub>9</sub> NO <sub>2</sub>               | 73323-68-9              | 115.06                | -0.00018              |
| 326 | 5-(Hydroxymethyl)dihydrofuran-2(3H)-one | C <sub>5</sub> H <sub>8</sub> O <sub>3</sub>                | 10374-51-3              | 116.05                | -0.00017              |
| 327 | Indole                                  | C <sub>8</sub> H <sub>7</sub> N                             | 120-72-9                | 117.06                | -0.00014              |
| 328 | 2,4,6-Octatriyn-1-ol                    | C <sub>8</sub> H <sub>6</sub> O                             | 13033-21-1              | 118.04                | -0.00011              |
| 329 | 3-Cyanophenol                           | C <sub>7</sub> H <sub>5</sub> NO                            | 873-62-1                | 119.04                | -0.00021              |
| 330 | 2-Methyl-5-vinylpyridine                | C <sub>8</sub> H <sub>9</sub> N                             | 140-76-1                | 119.07                | -0.0002               |
| 331 | 4-Hydroxybenzaldehyde                   | C <sub>7</sub> H <sub>6</sub> O <sub>2</sub>                | 123-08-0                | 122.04                | -0.00033              |
| 332 | (4Z)-4-Nonen-2-yne                      | C <sub>9</sub> H <sub>14</sub>                              | 53497-78-2              | 122.11                | -0.00024              |
| 333 | Hydroxy-1,4-benzoquinone                | C <sub>6</sub> H <sub>4</sub> O <sub>3</sub>                | 2474-72-8               | 124.02                | -0.00013              |
| 334 | Furan-2,5-dicarbaldehyde                | C <sub>6</sub> H <sub>4</sub> O <sub>3</sub>                | 823-82-5                | 124.02                | -0.00006              |
| 335 | 1-Acetyl-1,2,3,4-tetrahydropyridine     | C <sub>7</sub> H <sub>11</sub> NO                           | 19615-27-1              | 125.08                | -0.00025              |
| 336 | Pyrogallol                              | C <sub>6</sub> H <sub>6</sub> O <sub>3</sub>                | 87-66-1                 | 126.03                | -0.00026              |
| 337 | 5-Hydroxy-6-methyl-2H-pyran-2-one       | C <sub>6</sub> H <sub>6</sub> O <sub>3</sub>                | ChemSpider ID           | 126.03                | -0.00023              |

| NO  | Name                                          | Formula                                        | CAS                     | Molecular Weight (Da) | Annot.Delta Mass (Da) |
|-----|-----------------------------------------------|------------------------------------------------|-------------------------|-----------------------|-----------------------|
|     | ne                                            |                                                | 4934394                 |                       |                       |
| 338 | 4-Hydroxy-5-methyl-2-methylenefuran-3-one     | C <sub>6</sub> H <sub>6</sub> O <sub>3</sub>   | 948557-12-8             | 126.03                | -0.00016              |
| 339 | 5-Methyl-3-vinyl-2-oxazolidinone              | C <sub>6</sub> H <sub>9</sub> NO <sub>2</sub>  | 3395-98-0               | 127.06                | -0.00013              |
| 340 | 3-Hydroxy-6-methyl-2,3-dihydro-4H-pyran-4-one | C <sub>6</sub> H <sub>8</sub> O <sub>3</sub>   | ChemSpider ID<br>461448 | 128.05                | -0.00024              |
| 341 | Methyl (2E)-4-oxo-2-pentenoate                | C <sub>6</sub> H <sub>8</sub> O <sub>3</sub>   | 2833-24-1               | 128.05                | -0.0002               |
| 342 | Leucoline                                     | C <sub>9</sub> H <sub>7</sub> N                | 91-22-5                 | 129.06                | -0.00026              |
| 343 | Diisopropylethylamine                         | C <sub>8</sub> H <sub>19</sub> N               | 7087-68-5               | 129.15                | -0.00018              |
| 344 | Phenylpropynal                                | C <sub>9</sub> H <sub>6</sub> O                | 2579-22-8               | 130.04                | -0.00021              |
| 345 | (Hydroxyethyl)methacrylate                    | C <sub>6</sub> H <sub>10</sub> O <sub>3</sub>  | 868-77-9                | 130.06                | -0.00014              |
| 346 | 3-Methylindole                                | C <sub>9</sub> H <sub>9</sub> N                | 83-34-1                 | 131.07                | -0.00014              |
| 347 | 3-Methylsulfolene                             | C <sub>5</sub> H <sub>8</sub> O <sub>2</sub> S | 1193-10-8               | 132.02                | -0.00016              |
| 348 | Cinnamaldehyde                                | C <sub>9</sub> H <sub>8</sub> O                | 104-55-2                | 132.06                | -0.00025              |
| 349 | 4-Hydroxyindole                               | C <sub>8</sub> H <sub>7</sub> NO               | 2380-94-1               | 133.05                | -0.0002               |
| 350 | 1,9-Decadiyne                                 | C <sub>10</sub> H <sub>14</sub>                | 1720-38-3               | 134.11                | -0.0002               |
| 351 | [1,2,4]Triazolo[1,5-a]pyrimidin-7-ol          | C <sub>5</sub> H <sub>4</sub> N <sub>4</sub> O | 31592-08-2              | 136.04                | -0.00024              |
| 352 | 3-Anisaldehyde                                | C <sub>8</sub> H <sub>8</sub> O <sub>2</sub>   | 591-31-1                | 136.05                | -0.00025              |
| 353 | 3,4-Dihydroxystyrene                          | C <sub>8</sub> H <sub>8</sub> O <sub>2</sub>   | 6053-02-7               | 136.05                | -0.00021              |
| 354 | Phenyl acetate                                | C <sub>8</sub> H <sub>8</sub> O <sub>2</sub>   | 122-79-2                | 136.05                | -0.00015              |
| 355 | 1-Decen-3-yne                                 | C <sub>10</sub> H <sub>16</sub>                | 33622-26-3              | 136.12                | -0.00021              |
| 356 | 1,5,9-Decatriene                              | C <sub>10</sub> H <sub>16</sub>                | 13393-64-1              | 136.13                | -0.00016              |
| 357 | 6-Aminonicotinamide                           | C <sub>6</sub> H <sub>7</sub> N <sub>3</sub> O | 329-89-5                | 137.06                | -0.00024              |
| 358 | (2E)-3-(1H-Imidazol-5-yl)acrylamide           | C <sub>6</sub> H <sub>7</sub> N <sub>3</sub> O | 135200-64-5             | 137.06                | -0.00017              |
| 359 | Protocatechuic aldehyde                       | C <sub>7</sub> H <sub>6</sub> O <sub>3</sub>   | 139-85-5                | 138.03                | -0.00027              |
| 360 | 2-Methoxyresorcinol                           | C <sub>7</sub> H <sub>8</sub> O <sub>3</sub>   | 29267-67-2              | 140.05                | -0.00022              |
| 361 | Ethyl 2-furoate                               | C <sub>7</sub> H <sub>8</sub> O <sub>3</sub>   | 1335-40-6               | 140.05                | -0.00015              |
| 362 | Lepidine                                      | C <sub>10</sub> H <sub>9</sub> N               | 491-35-0                | 143.07                | -0.00008              |
| 363 | 2-Butynophenone                               | C <sub>10</sub> H <sub>8</sub> O               | 6710-62-9               | 144.06                | -0.00002              |
| 364 | Indole-4-carboxaldehyde                       | C <sub>9</sub> H <sub>7</sub> NO               | 1074-86-8               | 145.05                | -0.00011              |
| 365 | N-(4-Hydroxy-1-methylbutyl)acetamide          | C <sub>7</sub> H <sub>15</sub> NO <sub>2</sub> | ChemSpider ID<br>471526 | 145.11                | -0.00015              |
| 366 | 3,4-Decadiene-6,8-diyne-1-ol                  | C <sub>10</sub> H <sub>10</sub> O              | 6071-59-6               | 146.07                | -0.00007              |
| 367 | 3-(Methylthio)propyl isothiocyanate           | C <sub>5</sub> H <sub>9</sub> NS <sub>2</sub>  | 505-79-3                | 147.02                | -0.00032              |
| 368 | Cinnamamide                                   | C <sub>9</sub> H <sub>9</sub> NO               | 621-79-4                | 147.07                | -0.00013              |
| 369 | 3-Methyl-1,2,3,4-tetrahydroisoquinoline       | C <sub>10</sub> H <sub>13</sub> N              | 29726-60-1              | 147.10                | -0.00021              |
| 370 | (2E)-3-(3-Hydroxyphenyl)acrylaldehyde         | C <sub>9</sub> H <sub>8</sub> O <sub>2</sub>   | 26231-89-0              | 148.05                | -0.00019              |

| NO  | Name                                                 | Formula                                                      | CAS                       | Molecular Weight (Da) | Annot.Delta Mass (Da) |
|-----|------------------------------------------------------|--------------------------------------------------------------|---------------------------|-----------------------|-----------------------|
| 371 | 1,3-Bis(2-Hydroxyethyl)urea                          | C <sub>5</sub> H <sub>12</sub> N <sub>2</sub> O <sub>3</sub> | 15438-70-7                | 148.08                | -0.00018              |
| 372 | 2-Ethyl-2-nitro-1,3-propanediol                      | C <sub>5</sub> H <sub>11</sub> NO <sub>4</sub>               | 597-09-1                  | 149.07                | -0.00005              |
| 373 | 5-Formylsalicylaldehyde                              | C <sub>8</sub> H <sub>6</sub> O <sub>3</sub>                 | 3328-70-9                 | 150.03                | -0.00027              |
| 374 | 6-Hydroxy-3-coumaranone                              | C <sub>8</sub> H <sub>6</sub> O <sub>3</sub>                 | 6272-26-0                 | 150.03                | -0.00016              |
| 375 | Vanillin                                             | C <sub>8</sub> H <sub>8</sub> O <sub>3</sub>                 | 121-33-5                  | 152.05                | -0.00028              |
| 376 | Methylparaben                                        | C <sub>8</sub> H <sub>8</sub> O <sub>3</sub>                 | 99-76-3                   | 152.05                | -0.00024              |
| 377 | Methyl salicylate                                    | C <sub>8</sub> H <sub>8</sub> O <sub>3</sub>                 | 119-36-8                  | 152.05                | -0.00025              |
| 378 | Resacetophenone                                      | C <sub>8</sub> H <sub>8</sub> O <sub>3</sub>                 | 89-84-9                   | 152.05                | -0.00019              |
| 379 | 1-Adamantanol                                        | C <sub>10</sub> H <sub>16</sub> O                            | 768-95-6                  | 152.12                | -0.00025              |
| 380 | N,N-Dimethyl-2-(2-methyl-1H-imidazol-5-yl)ethanamine | C <sub>8</sub> H <sub>15</sub> N <sub>3</sub>                | ChemSpider ID<br>476026   | 153.13                | -0.00036              |
| 381 | Triacetanamine                                       | C <sub>9</sub> H <sub>17</sub> NO                            | 826-36-8                  | 155.13                | -0.00027              |
| 382 | 1-Benzylimidazole                                    | C <sub>10</sub> H <sub>10</sub> N <sub>2</sub>               | 4238-71-5                 | 158.08                | -0.00014              |
| 383 | Methyl 2-morpholinoacetate                           | C <sub>7</sub> H <sub>13</sub> NO <sub>3</sub>               | 35855-10-8                | 159.09                | -0.00022              |
| 384 | 2-Morpholin-4-ylacetohydrazide                       | C <sub>6</sub> H <sub>13</sub> N <sub>3</sub> O <sub>2</sub> | 770-17-2                  | 159.10                | -0.00013              |
| 385 | 4-Methoxycinnamaldehyde                              | C <sub>10</sub> H <sub>10</sub> O <sub>2</sub>               | 1963-36-6                 | 162.07                | -0.00037              |
| 386 | Methyl cinnamate                                     | C <sub>10</sub> H <sub>10</sub> O <sub>2</sub>               | 103-26-4                  | 162.07                | -0.00028              |
| 387 | 3'-Methoxypropiofenone                               | C <sub>10</sub> H <sub>12</sub> O <sub>2</sub>               | 37951-49-8                | 164.08                | -0.00034              |
| 388 | Eugenol                                              | C <sub>10</sub> H <sub>12</sub> O <sub>2</sub>               | 97-53-0                   | 164.08                | -0.00027              |
| 389 | Phloracetophenone                                    | C <sub>8</sub> H <sub>8</sub> O <sub>4</sub>                 | 480-66-0                  | 168.04                | -0.00025              |
| 390 | D-3,4-Dihydroxyphenylglycolaldehyde                  | C <sub>8</sub> H <sub>8</sub> O <sub>4</sub>                 | 52819-70-2                | 168.04                | -0.00024              |
| 391 | 5-Formylfurfuryl acetate                             | C <sub>8</sub> H <sub>8</sub> O <sub>4</sub>                 | 10551-58-3                | 168.04                | -0.00015              |
| 392 | N-Methylcyclodecanamine                              | C <sub>11</sub> H <sub>23</sub> N                            | 80789-66-8                | 169.18                | -0.00023              |
| 393 | Ethyl 4-amino-1-piperidinecarboxylate                | C <sub>8</sub> H <sub>16</sub> N <sub>2</sub> O <sub>2</sub> | 58859-46-4                | 172.12                | -0.00017              |
| 394 | tert-Butyl 2-hydroxyethylmethylcarbamate             | C <sub>8</sub> H <sub>17</sub> NO <sub>3</sub>               | 57561-39-4                | 175.12                | -0.00016              |
| 395 | 5-Benzylidihydro-2(3H)-furanone                      | C <sub>11</sub> H <sub>12</sub> O <sub>2</sub>               | 415902-37-3               | 176.08                | -0.00036              |
| 396 | Heptylbenzene                                        | C <sub>13</sub> H <sub>20</sub>                              | 1078-71-3                 | 176.16                | -0.00033              |
| 397 | 3-(1-Methylpyrrolidin-2-yl)pyridin-2-amine           | C <sub>10</sub> H <sub>15</sub> N <sub>3</sub>               | 32726-84-4                | 177.13                | -0.00028              |
| 398 | Allyl salicylate                                     | C <sub>10</sub> H <sub>10</sub> O <sub>3</sub>               | 10484-09-0                | 178.06                | -0.00018              |
| 399 | (E,E,E)-2,4,6-Dodecatrienal                          | C <sub>12</sub> H <sub>18</sub> O                            | 147217-66-1               | 178.14                | -0.00035              |
| 400 | 8-Hydroxy-6,7-dihydroisoquinoline-1,3(2H,5H)-dione   | C <sub>9</sub> H <sub>9</sub> NO <sub>3</sub>                | 37704-54-4                | 179.06                | -0.00073              |
| 401 | 2-(6-Amino-1H-purin-1-yl)ethanol                     | C <sub>7</sub> H <sub>9</sub> N <sub>5</sub> O               | ChemSpider ID<br>58838095 | 179.08                | -0.00029              |
| 402 | 4-Isopropyl-7-methyl-1H-azepine-2,5-dione            | C <sub>10</sub> H <sub>13</sub> NO <sub>2</sub>              | 10315-42-1                | 179.09                | -0.00045              |
| 403 | trans-Stilbene                                       | C <sub>14</sub> H <sub>12</sub>                              | 103-30-0                  | 180.09                | -0.00033              |
| 404 | Methyl (E,E,Z)-2,4,6-Decatrienoate                   | C <sub>11</sub> H <sub>16</sub> O <sub>2</sub>               | 51544-64-0                | 180.11                | -0.00038              |

| NO  | Name                                                              | Formula                                                        | CAS                       | Molecular Weight (Da) | Annot.Delta Mass (Da) |
|-----|-------------------------------------------------------------------|----------------------------------------------------------------|---------------------------|-----------------------|-----------------------|
| 405 | 2-tert-Butyl-4-methoxyphenol                                      | C <sub>11</sub> H <sub>16</sub> O <sub>2</sub>                 | 121-00-6                  | 180.11                | -0.00038              |
| 406 | 2-(2-Methylenecyclopropyl)-3-oxosuccinate                         | C <sub>8</sub> H <sub>6</sub> O <sub>5</sub>                   | ChemSpider ID<br>24785550 | 182.02                | -0.00024              |
| 407 | 5-(2-Methylpropylidene)-2,4,6(1H,3H,5H)-pyrimidinetrione<br>Ethyl | C <sub>8</sub> H <sub>10</sub> N <sub>2</sub> O <sub>3</sub>   | 27406-43-5                | 182.07                | -0.00051              |
| 408 | 4-hydroxy-2-methylpyrimidine-5-carboxylate                        | C <sub>8</sub> H <sub>10</sub> N <sub>2</sub> O <sub>3</sub>   | 53135-24-3                | 182.07                | -0.00047              |
| 409 | Mephesisin                                                        | C <sub>10</sub> H <sub>14</sub> O <sub>3</sub>                 | 59-47-2                   | 182.09                | -0.00026              |
| 410 | 10-Undecynoic acid                                                | C <sub>11</sub> H <sub>18</sub> O <sub>2</sub>                 | 2777-65-3                 | 182.13                | -0.00029              |
| 411 | (2E)-2-Tridecene-4,6,8-triyn-1-ol                                 | C <sub>13</sub> H <sub>14</sub> O                              | 6071-47-2                 | 186.10                | -0.00032              |
| 412 | Methyl 1-acetyl-4-hydroxyprolinate                                | C <sub>8</sub> H <sub>13</sub> NO <sub>4</sub>                 | ChemSpider ID<br>467588   | 187.08                | -0.00014              |
| 413 | Octahydro-1,6,7,8-indolizinetetrol                                | C <sub>8</sub> H <sub>15</sub> NO <sub>4</sub>                 | 142393-60-0               | 189.10                | -0.00032              |
| 414 | tert-Butyl<br>(2-amino-2-thioxoethyl)carbamate                    | C <sub>7</sub> H <sub>14</sub> N <sub>2</sub> O <sub>2</sub> S | 89226-13-1                | 190.08                | -0.00033              |
| 415 | 2,6-Dimethoxy-4-allylphenol                                       | C <sub>11</sub> H <sub>14</sub> O <sub>3</sub>                 | 6627-88-9                 | 194.09                | -0.00069              |
| 416 | 2-Octanoylfuran                                                   | C <sub>12</sub> H <sub>18</sub> O <sub>2</sub>                 | 5456-77-9                 | 194.13                | -0.00044              |
| 417 | Sedanolid                                                         | C <sub>12</sub> H <sub>18</sub> O <sub>2</sub>                 | 6415-59-4                 | 194.13                | -0.0004               |
| 418 | 2-(Ethylamino)-4,5-dihydroxybenzamide                             | C <sub>9</sub> H <sub>12</sub> N <sub>2</sub> O <sub>3</sub>   | 127793-87-7               | 196.08                | -0.00064              |
| 419 | 2-[2-(Benzyloxy)ethoxy]ethanol                                    | C <sub>11</sub> H <sub>16</sub> O <sub>3</sub>                 | 2050-25-1                 | 196.11                | -0.00039              |
| 420 | Dibenzylamine                                                     | C <sub>14</sub> H <sub>15</sub> N                              | 103-49-1                  | 197.12                | -0.00038              |
| 421 | 2-Amino-2-[4-amino-6-(dimethylamino)-1,3,5-triazin-2-yl]ethanol   | C <sub>7</sub> H <sub>14</sub> N <sub>6</sub> O                | ChemSpider ID<br>519465   | 198.12                | 0.00038               |
| 422 | 3,3-Dimethyl-1,5-dioxaspiro(5.5)undecan-9-one<br>Ethyl            | C <sub>11</sub> H <sub>18</sub> O <sub>3</sub>                 | 69225-59-8                | 198.13                | -0.00038              |
| 423 | 5-ethoxy-4-methyl-1,3-oxazole-2-carboxylate                       | C <sub>9</sub> H <sub>13</sub> NO <sub>4</sub>                 | 23429-04-1                | 199.08                | -0.00029              |
| 424 | (2Z)-2-Benzylidene-6-heptenal                                     | C <sub>14</sub> H <sub>16</sub> O                              | ChemSpider ID<br>74853191 | 200.12                | -0.00024              |
| 425 | Diisopropyl<br>diazene-1,2-dicarboxylate                          | C <sub>8</sub> H <sub>14</sub> N <sub>2</sub> O <sub>4</sub>   | 2446-83-5                 | 202.10                | -0.00032              |
| 426 | Xanthurenic acid                                                  | C <sub>10</sub> H <sub>7</sub> NO <sub>4</sub>                 | 59-00-7                   | 205.04                | -0.00031              |
| 427 | Ethyl methylphenylglycidate                                       | C <sub>12</sub> H <sub>14</sub> O <sub>3</sub>                 | 77-83-8                   | 206.09                | -0.00037              |
| 428 | Asarone                                                           | C <sub>12</sub> H <sub>16</sub> O <sub>3</sub>                 | 2883-98-9                 | 208.11                | -0.00024              |
| 429 | 2-Methylene-5,10-undecadienoic acid methyl ester                  | C <sub>13</sub> H <sub>20</sub> O <sub>2</sub>                 | 51788-60-4                | 208.15                | -0.00042              |
| 430 | 4-Heptyloxyphenol                                                 | C <sub>13</sub> H <sub>20</sub> O <sub>2</sub>                 | 13037-86-0                | 208.15                | -0.00033              |
| 431 | 5-(4-Methoxyphenyl)-1,3-cyclohexanedione                          | C <sub>13</sub> H <sub>14</sub> O <sub>3</sub>                 | 1774-12-5                 | 218.09                | -0.00042              |

| NO  | Name                                                                  | Formula                                                       | CAS                      | Molecular Weight (Da) | Annot.Delta Mass (Da) |
|-----|-----------------------------------------------------------------------|---------------------------------------------------------------|--------------------------|-----------------------|-----------------------|
| 432 | (4E)-6-(1,3-Benzodioxol-5-yl)-4-hexen-3-one                           | C <sub>13</sub> H <sub>14</sub> O <sub>3</sub>                | ChemSpider ID<br>4509686 | 218.09                | -0.00039              |
| 433 | D-Pantothenic acid                                                    | C <sub>9</sub> H <sub>17</sub> NO <sub>5</sub>                | 79-83-4                  | 219.11                | -0.00033              |
| 434 | 1-(5-Acetyl-2-hydroxyphenyl)-3-methyl-1-butanone                      | C <sub>13</sub> H <sub>16</sub> O <sub>3</sub>                | 62458-64-4               | 220.11                | -0.00045              |
| 435 | Hexamethylcyclotrisiloxane                                            | C <sub>6</sub> H <sub>18</sub> O <sub>3</sub> Si <sub>3</sub> | 541-05-9                 | 222.06                | -0.00044              |
| 436 | 3-(5-oxo-4,5,6,7-tetrahydro-1H-pyrrolo[2,3-c]pyridin-3-yl)propanoate  | C <sub>11</sub> H <sub>14</sub> N <sub>2</sub> O <sub>3</sub> | ChemSpider ID<br>533528  | 222.10                | -0.00037              |
| 437 | N-[2-(4-Morpholinyl)ethyl]-1H-1,2,4-triazole-5-carboxamide            | C <sub>9</sub> H <sub>15</sub> N <sub>5</sub> O <sub>2</sub>  | ChemSpider ID<br>493565  | 225.12                | -0.0005               |
| 438 | 1-[(2,2-Dimethyl-1,3-dioxolan-4-yl)methyl]-2,4(1H,3H)-pyrimidinedione | C <sub>10</sub> H <sub>14</sub> N <sub>2</sub> O <sub>4</sub> | ChemSpider ID<br>3233081 | 226.09                | -0.00045              |
| 439 | 1,6-Hexanediol diacrylate                                             | C <sub>12</sub> H <sub>18</sub> O <sub>4</sub>                | 13048-33-4               | 226.12                | -0.00052              |
| 440 | 1,8-Diazacyclotetradecan-2,9-dione                                    | C <sub>12</sub> H <sub>22</sub> N <sub>2</sub> O <sub>2</sub> | 56403-09-9               | 226.17                | -0.00034              |
| 441 | 1,4-diazabicyclo[2.2.2]octane-2,3-dimethyl-1-carboxylate              | C <sub>10</sub> H <sub>16</sub> N <sub>2</sub> O <sub>4</sub> | ChemSpider ID<br>519583  | 228.11                | -0.00019              |
| 442 | 5-Hydroxy-6-methoxy-7H-furo[3,2-g]chromen-7-one                       | C <sub>12</sub> H <sub>8</sub> O <sub>5</sub>                 | 35779-46-5               | 232.04                | -0.00036              |
| 443 | 4-(4-Hydroxy-3-methoxyphenyl)-3,6-dihydro-1(2H)-pyridinecarbaldehyde  | C <sub>13</sub> H <sub>15</sub> NO <sub>3</sub>               | ChemSpider ID<br>535604  | 233.10                | -0.00064              |
| 444 | 3-Hydroxy-4,5,6-trimethoxytetrahydro-2H-pyran-2-carboxamide           | C <sub>9</sub> H <sub>17</sub> NO <sub>6</sub>                | ChemSpider ID<br>482310  | 235.11                | -0.00048              |
| 445 | 4-Hydroxy-4-(5-methoxy-2-nitrophenyl)-2-butanone                      | C <sub>11</sub> H <sub>13</sub> NO <sub>5</sub>               | 681446-84-4              | 239.08                | -0.00052              |
| 446 | 2,5-Anhydro-1-deoxy-1-(2-pyridinylamino)hexitol                       | C <sub>11</sub> H <sub>16</sub> N <sub>2</sub> O <sub>4</sub> | ChemSpider ID<br>497379  | 240.11                | -0.00036              |
| 447 | 4,5-Epoxymorphinan                                                    | C <sub>16</sub> H <sub>19</sub> NO                            | ChemSpider ID<br>536950  | 241.15                | -0.00066              |
| 448 | 2-[(cyclohexylcarbonyl)amino]-3-methylbutanoate                       | C <sub>13</sub> H <sub>23</sub> NO <sub>3</sub>               | ChemSpider ID<br>479972  | 241.17                | -0.0006               |
| 449 | 1-(2,4-Dideoxyhexopyranosyl)-2,4(1H,3H)-pyrimidinedione               | C <sub>10</sub> H <sub>14</sub> N <sub>2</sub> O <sub>5</sub> | ChemSpider ID<br>506602  | 242.09                | -0.00043              |
| 450 | Dimethyl N-isobutyrylglutamate                                        | C <sub>11</sub> H <sub>19</sub> NO <sub>5</sub>               | ChemSpider ID<br>469496  | 245.13                | -0.00042              |
| 451 | 2,3',4,6-Tetrahydroxybenzophenone                                     | C <sub>13</sub> H <sub>10</sub> O <sub>5</sub>                | 26271-33-0               | 246.05                | -0.00047              |
| 452 | 2-(12-Tridecyn-1-yl)furan                                             | C <sub>17</sub> H <sub>26</sub> O                             | 24708-33-6               | 246.20                | -0.00046              |

| NO  | Name                                                                       | Formula                                                       | CAS                       | Molecular Weight (Da) | Annot.Delta Mass (Da) |
|-----|----------------------------------------------------------------------------|---------------------------------------------------------------|---------------------------|-----------------------|-----------------------|
| 453 | Podocarpin-12-ol                                                           | C <sub>17</sub> H <sub>30</sub> O                             | ChemSpider ID<br>503994   | 250.23                | -0.00072              |
| 454 | 6-Hydroxy-4,4,7-trimethyl-5-nitro-2-chromanone                             | C <sub>12</sub> H <sub>13</sub> NO <sub>5</sub>               | ChemSpider ID<br>538525   | 251.08                | -0.00066              |
| 455 | Mono(3-carboxypropyl) phthalate                                            | C <sub>12</sub> H <sub>12</sub> O <sub>6</sub>                | 66851-46-5                | 252.06                | -0.00052              |
| 456 | (2Z)-3-(6,7-Dimethoxy-1,3-benzodioxol-5-yl)-2-hydroxyacrylaldehyde         | C <sub>12</sub> H <sub>12</sub> O <sub>6</sub>                | ChemSpider ID<br>74852295 | 252.06                | -0.00035              |
| 457 | Pirimicarb-desmethyl-formamido                                             | C <sub>11</sub> H <sub>16</sub> N <sub>4</sub> O <sub>3</sub> | 27218-04-8                | 252.12                | -0.00069              |
| 458 | 2-[4-(3-Hydroxypropyl)-2-methoxyphenoxy]-1,3-propanediol                   | C <sub>13</sub> H <sub>20</sub> O <sub>5</sub>                | 71046-09-8                | 256.13                | -0.0007               |
| 459 | Octadecapenten-3-one                                                       | C <sub>18</sub> H <sub>26</sub> O                             | ChemSpider ID<br>10476703 | 258.20                | -0.00063              |
| 460 | Propyl<br>N-(methoxycarbonyl)-N-methylglycyl-N-methylglycinate             | C <sub>11</sub> H <sub>20</sub> N <sub>2</sub> O <sub>5</sub> | ChemSpider ID<br>4927395  | 260.14                | -0.00046              |
| 461 | Maclurin                                                                   | C <sub>13</sub> H <sub>10</sub> O <sub>6</sub>                | 519-34-6                  | 262.05                | -0.00052              |
| 462 | Methohexital                                                               | C <sub>14</sub> H <sub>18</sub> N <sub>2</sub> O <sub>3</sub> | 151-83-7                  | 262.13                | -0.00058              |
| 463 | 1-(2-Methoxy-5-nitrobenzyl)-4-methylpiperazine                             | C <sub>13</sub> H <sub>19</sub> N <sub>3</sub> O <sub>3</sub> | ChemSpider ID<br>471676   | 265.14                | -0.0004               |
| 464 | Ethyl<br>(2Z)-[(1,3-benzodioxol-5-ylmethyl)imino](hydroxyamino)acetate     | C <sub>12</sub> H <sub>14</sub> N <sub>2</sub> O <sub>5</sub> | ChemSpider ID<br>4911614  | 266.09                | -0.00048              |
| 465 | (2E)-N-(4-Amino-2,3-dihydroxybutyl)-3-(4-hydroxyphenyl)acrylamide          | C <sub>13</sub> H <sub>18</sub> N <sub>2</sub> O <sub>4</sub> | ChemSpider ID<br>59650572 | 266.13                | -0.00056              |
| 466 | Methyl<br>2-hydroxy-6-methyl-3-nitro-4-(2-oxopropyl)benzoate               | C <sub>12</sub> H <sub>13</sub> NO <sub>6</sub>               | 89586-50-5                | 267.07                | -0.00046              |
| 467 | Rhamnopterin                                                               | C <sub>10</sub> H <sub>13</sub> N <sub>5</sub> O <sub>4</sub> | 13392-24-0                | 267.10                | -0.00057              |
| 468 | 1-Decanoyl-2,6-dimethylpiperidine                                          | C <sub>17</sub> H <sub>33</sub> NO                            | 4629-19-0                 | 267.26                | -0.00075              |
| 469 | Thiodiacetophenone                                                         | C <sub>16</sub> H <sub>14</sub> O <sub>2</sub> S              | 2461-80-5                 | 270.07                | -0.00075              |
| 470 | (3E)-3-[(Methoxyacetyl)hydrazono]-N-(tetrahydro-2-furanylmethyl)butanamide | C <sub>12</sub> H <sub>21</sub> N <sub>3</sub> O <sub>4</sub> | ChemSpider ID<br>7871039  | 271.15                | -0.00085              |
| 471 | Di-2-pentanyl malate                                                       | C <sub>14</sub> H <sub>26</sub> O <sub>5</sub>                | ChemSpider ID<br>468884   | 274.18                | 0.00053               |
| 472 | 4,5,6-Trimethoxy-7H-furo[3,2-g]chromen-7-one                               | C <sub>14</sub> H <sub>12</sub> O <sub>6</sub>                | 18646-71-4                | 276.06                | -0.00078              |
| 473 | p-Coumaroylagmatine                                                        | C <sub>14</sub> H <sub>20</sub> N <sub>4</sub> O <sub>2</sub> | 7295-86-5                 | 276.16                | -0.00059              |
| 474 | 6-Shogaol                                                                  | C <sub>17</sub> H <sub>24</sub> O <sub>3</sub>                | 555-66-8                  | 276.17                | -0.00061              |
| 475 | Phenyl laurate                                                             | C <sub>18</sub> H <sub>28</sub> O <sub>2</sub>                | 4228-00-6                 | 276.21                | -0.00081              |
| 476 | [3-Acetyloxy-2-(acetyloxymethyl)-2-nitropropyl] acetate                    | C <sub>10</sub> H <sub>15</sub> NO <sub>8</sub>               | 7344-23-2                 | 277.08                | -0.00091              |

| NO  | Name                                                                                              | Formula                                                        | CAS                       | Molecular Weight (Da) | Annot.Delta Mass (Da) |
|-----|---------------------------------------------------------------------------------------------------|----------------------------------------------------------------|---------------------------|-----------------------|-----------------------|
| 477 | 6,8-Dihydroxy-3-[(2S)-2-hydroxy-4-oxopentyl]-1H-isochromen-1-one                                  | C <sub>14</sub> H <sub>14</sub> O <sub>6</sub>                 | ChemSpider ID<br>31143389 | 278.08                | -0.00062              |
| 478 | 4-(3-Butoxy-4-methoxybenzyl)-2-imidazolidinone                                                    | C <sub>15</sub> H <sub>22</sub> N <sub>2</sub> O <sub>3</sub>  | 29925-17-5                | 278.16                | -0.00068              |
| 479 | Heptyl (4-nitrophenyl)carbamate;<br>Heptyl 4-nitrophenylcarbamate                                 | C <sub>14</sub> H <sub>20</sub> N <sub>2</sub> O <sub>4</sub>  | 92374-99-7                | 280.14                | -0.0006               |
| 480 | (2,2-Dimethyl-1,3-dioxolan-4-yl)methyl 4-nitrobenzoate                                            | C <sub>13</sub> H <sub>15</sub> NO <sub>6</sub>                | ChemSpider ID<br>470054   | 281.09                | -0.00081              |
| 481 | N,N'-(2,4,5-Trimethoxy-1,3-phenylene)diacetamide                                                  | C <sub>13</sub> H <sub>18</sub> N <sub>2</sub> O <sub>5</sub>  | ChemSpider ID<br>524502   | 282.12                | -0.00051              |
| 482 | N-Acetoxy-N-[5-(2,5-dioxo-1-pyrrolidinyl)pentyl]acetamide                                         | C <sub>13</sub> H <sub>20</sub> N <sub>2</sub> O <sub>5</sub>  | ChemSpider ID<br>470427   | 284.14                | -0.00045              |
| 483 | (2Z)-4,6,7-Trihydroxy-2-(4-hydroxybenzylidene)-1-benzofuran-3(2H)-one<br>2,5-Dioxo-1-pyrrolidinyl | C <sub>15</sub> H <sub>10</sub> O <sub>6</sub>                 | ChemSpider ID<br>24846195 | 286.05                | -0.00072              |
| 484 | N-([(2-methyl-2-propanyl)oxy]carbonyl} alaninate<br>Diethyl                                       | C <sub>12</sub> H <sub>18</sub> N <sub>2</sub> O <sub>6</sub>  | 3392-05-0                 | 286.12                | -0.00079              |
| 485 | [amino(2-isobutrylhydrazino)methylene]malonate                                                    | C <sub>12</sub> H <sub>21</sub> N <sub>3</sub> O <sub>5</sub>  | ChemSpider ID<br>1651360  | 287.15                | -0.00072              |
| 486 | 2-[(4-Amino-7H-pyrrolo[2,3-d]pyrimidin-7-yl)methoxy]ethyl dihydrogen phosphate                    | C <sub>9</sub> H <sub>13</sub> N <sub>4</sub> O <sub>5</sub> P | 86626-01-9                | 288.06                | 0.00047               |
| 487 | 1,5-Anhydro-1-(2,4,6-trihydroxyphenyl)hexitol<br>Pentyl                                           | C <sub>12</sub> H <sub>16</sub> O <sub>8</sub>                 | ChemSpider ID<br>74886754 | 288.08                | -0.0007               |
| 488 | N-(methoxycarbonyl)-N-methylglycyl-N-methylglycinate                                              | C <sub>13</sub> H <sub>24</sub> N <sub>2</sub> O <sub>5</sub>  | ChemSpider ID<br>4927397  | 288.17                | -0.0009               |
| 489 | 6-Amino-1-[2-(3,4-dimethoxyphenyl)ethyl]pyrimidine-2,4(1H,3H)-dione                               | C <sub>14</sub> H <sub>17</sub> N <sub>3</sub> O <sub>4</sub>  | 446266-76-8               | 291.12                | -0.00061              |
| 490 | 2-Acetyl-4,7,8-trihydroxy-6-methoxy-3-methyl-1,5-naphthalenedione                                 | C <sub>14</sub> H <sub>12</sub> O <sub>7</sub>                 | 1228-77-9                 | 292.06                | -0.00039              |
| 491 | Methyl alpha-aspartylphenylalaninate                                                              | C <sub>14</sub> H <sub>18</sub> N <sub>2</sub> O <sub>5</sub>  | 22839-65-2                | 294.12                | -0.00065              |
| 492 | Troxipide                                                                                         | C <sub>15</sub> H <sub>22</sub> N <sub>2</sub> O <sub>4</sub>  | 30751-05-4                | 294.16                | -0.00061              |
| 493 | Disulfiram                                                                                        | C <sub>10</sub> H <sub>20</sub> N <sub>2</sub> S <sub>4</sub>  | 97-77-8                   | 296.05                | -0.00066              |
| 494 | Octamethylcyclotetrasiloxane                                                                      | C <sub>8</sub> H <sub>24</sub> O <sub>4</sub> Si <sub>4</sub>  | 556-67-2                  | 296.07                | -0.00051              |
| 495 | 2,3,5,6-Tetrahydroxy-4-methoxy-N'-phenylhexanehydrazide                                           | C <sub>13</sub> H <sub>20</sub> N <sub>2</sub> O <sub>6</sub>  | 7404-33-3                 | 300.13                | -0.00041              |
| 496 | 3-Hydroxy-cis-5-octenoylcarnitine                                                                 | C <sub>15</sub> H <sub>27</sub> NO <sub>5</sub>                | ChemSpider ID             | 301.19                | -0.00082              |

| NO  | Name                                                                               | Formula                                                       | CAS                       | Molecular Weight (Da) | Annot.Delta Mass (Da) |
|-----|------------------------------------------------------------------------------------|---------------------------------------------------------------|---------------------------|-----------------------|-----------------------|
|     |                                                                                    |                                                               | 28639168                  |                       |                       |
| 497 | 1,5-Dicyclopentyl-3-(2-cyclopentyl-ethyl)-2-pentene                                | C <sub>22</sub> H <sub>38</sub>                               | 54934-71-3                | 302.30                | -0.00076              |
| 498 | 3-(2,4,5-Trihydroxyphenyl)-4,6,7-chromanetriol                                     | C <sub>15</sub> H <sub>14</sub> O <sub>7</sub>                | ChemSpider ID<br>74851598 | 306.07                | -0.00076              |
| 499 | Myristic acid diethanolamide                                                       | C <sub>18</sub> H <sub>37</sub> NO <sub>3</sub>               | 7545-23-5                 | 315.28                | -0.00063              |
| 500 | 1-(4-Ethoxyphenyl)-3-(4-methyl-1-piperazinyl)-2,5-pyrrolidinedione                 | C <sub>17</sub> H <sub>23</sub> N <sub>3</sub> O <sub>3</sub> | 21621-46-5                | 317.17                | -0.00071              |
| 501 | 2-Aminooctadecane-1,3,4-triol Methyl                                               | C <sub>18</sub> H <sub>39</sub> NO <sub>3</sub>               | 13552-11-9                | 317.29                | -0.00073              |
| 502 | N-[1-(4-ethoxyphenyl)-2,5-dioxo-3-pyrrolidinyl]alaninate                           | C <sub>16</sub> H <sub>20</sub> N <sub>2</sub> O <sub>5</sub> | 1008942-96-8              | 320.14                | -0.00076              |
| 503 | 2-sec-Butyl-4,6-dinitrophenyl isopropyl carbonate Isopropyl                        | C <sub>14</sub> H <sub>18</sub> N <sub>2</sub> O <sub>7</sub> | 973-21-7                  | 326.11                | -0.00071              |
| 504 | 10-hydroxy-11-(4-morpholinyl)undecanoate                                           | C <sub>18</sub> H <sub>35</sub> NO <sub>4</sub>               | ChemSpider ID<br>3235787  | 329.26                | -0.00098              |
| 505 | (2S,3S)-2-(Dimethylamino)-1,3-octadecanediol                                       | C <sub>20</sub> H <sub>43</sub> NO <sub>2</sub>               | ChemSpider ID<br>24823237 | 329.33                | -0.00084              |
| 506 | 2-[4-(Benzyloxy)-3-ethoxyphenyl]-2-hydroxyethyl acetate Dimethyl                   | C <sub>19</sub> H <sub>22</sub> O <sub>5</sub>                | ChemSpider ID<br>490054   | 330.15                | -0.00091              |
| 507 | 4-(2,5-dimethoxyphenyl)-1,4-dihydro-3,5-pyridinedicarboxylate                      | C <sub>17</sub> H <sub>19</sub> NO <sub>6</sub>               | ChemSpider ID<br>527848   | 333.12                | -0.00084              |
| 508 | N-Benzyl-N-isopropyl-2-naphthalenesulfonamide Methyl                               | C <sub>20</sub> H <sub>21</sub> NO <sub>2</sub> S             | ChemSpider ID<br>643051   | 339.13                | 0.00158               |
| 509 | 6-(dimethylamino)octadecanoate                                                     | C <sub>21</sub> H <sub>43</sub> NO <sub>2</sub>               | 56817-90-4                | 341.33                | -0.00102              |
| 510 | 2,2'-(3,6-Dioxo-2,5-piperazinediyl)bis(N-hydroxy-N-propylacetamide)                | C <sub>14</sub> H <sub>24</sub> N <sub>4</sub> O <sub>6</sub> | ChemSpider ID<br>477146   | 344.17                | -0.0009               |
| 511 | 3-[(3-Hydroxyundecanoyl)oxy]-4-(trimethylammonio)butanoate                         | C <sub>18</sub> H <sub>35</sub> NO <sub>5</sub>               | ChemSpider ID<br>59664326 | 345.25                | -0.00111              |
| 512 | 3-Methyl-5-(5,5,8a-trimethyl-2-methyl-7-oxodecahydro-1-naphthalenyl)pentyl acetate | C <sub>22</sub> H <sub>36</sub> O <sub>3</sub>                | ChemSpider ID<br>29814842 | 348.27                | -0.00062              |
| 513 | 10-Undecenyl-1-N-(cyclohexylcarboxonyl)alaninate                                   | C <sub>21</sub> H <sub>37</sub> NO <sub>3</sub>               | ChemSpider ID<br>4926097  | 351.28                | -0.00081              |
| 514 | Tridecyl N-[(allyloxy)carbonyl]alaninate                                           | C <sub>20</sub> H <sub>37</sub> NO <sub>4</sub>               | ChemSpider ID<br>4928205  | 355.27                | -0.00103              |
| 515 | Tetradecyl N-(ethoxycarbonyl)alaninate                                             | C <sub>20</sub> H <sub>39</sub> NO <sub>4</sub>               | ChemSpider ID<br>4927832  | 357.29                | -0.00107              |
| 516 | 3-(7-Hydroxy-4b-methyl-2-methyle                                                   | C <sub>25</sub> H <sub>34</sub> O <sub>2</sub>                | ChemSpider ID             | 366.26                | -0.00079              |

| NO  | Name                                                                    | Formula                                                        | CAS                       | Molecular Weight (Da) | Annot.Delta Mass (Da) |
|-----|-------------------------------------------------------------------------|----------------------------------------------------------------|---------------------------|-----------------------|-----------------------|
|     | netetradecahydro-1-phenanthrenyl)-<br>1-phenyl-1-propanone              |                                                                | 537775                    |                       |                       |
| 517 | Decamethylcyclopentasiloxane                                            | C <sub>10</sub> H <sub>30</sub> O <sub>5</sub> Si <sub>5</sub> | 541-02-6                  | 370.09                | -0.00091              |
| 518 | Riboflavin                                                              | C <sub>17</sub> H <sub>20</sub> N <sub>4</sub> O <sub>6</sub>  | 83-88-5                   | 376.14                | -0.00113              |
|     | 1,6-Dimethyl                                                            |                                                                |                           |                       |                       |
| 519 | 2-O-(3,4,5-trihydroxybenzoyl)hexar<br>ate                               | C <sub>15</sub> H <sub>18</sub> O <sub>12</sub>                | ChemSpider ID<br>35014325 | 390.08                | -0.00065              |
|     | Tetramethyl                                                             |                                                                |                           |                       |                       |
| 520 | 1-tert-butyl-1,6-dihydro-6-methoxy<br>-2,3,4,5-pyridinetetracarboxylate | C <sub>18</sub> H <sub>25</sub> NO <sub>9</sub>                | ChemSpider ID<br>538592   | 399.15                | -0.00092              |
| 521 | 3-Methoxy-1,2-didehydrocrinan-6,1<br>1-diyl diacetate                   | C <sub>21</sub> H <sub>23</sub> NO <sub>7</sub>                | ChemSpider ID<br>470632   | 401.15                | -0.00109              |
| 522 | Octyl propyl undecyl phosphate                                          | C <sub>22</sub> H <sub>47</sub> O <sub>4</sub> P               | ChemSpider ID<br>4927331  | 406.32                | 0.00127               |
| 523 | 7-Dehydrocholesterol acetate                                            | C <sub>29</sub> H <sub>46</sub> O <sub>2</sub>                 | 1059-86-5                 | 426.35                | -0.00099              |
| 524 | Cholesta-7,14-dien-7-yl acetate                                         | C <sub>29</sub> H <sub>46</sub> O <sub>2</sub>                 | ChemSpider ID<br>549949   | 426.35                | -0.00071              |
| 525 | (3beta,5beta,6beta)-5,6-Epoxyergos<br>t-24(28)-ene-3,19-diol            | C <sub>28</sub> H <sub>46</sub> O <sub>3</sub>                 | ChemSpider ID<br>10283126 | 430.34                | -0.00101              |
| 526 | Trimazosin                                                              | C <sub>20</sub> H <sub>29</sub> N <sub>5</sub> O <sub>6</sub>  | 35795-16-5                | 435.21                | -0.00202              |
| 527 | Oleanolic aldehyde                                                      | C <sub>30</sub> H <sub>48</sub> O <sub>2</sub>                 | 17020-22-3                | 440.36                | -0.0011               |
| 528 | 7-Hydroxycholest-5-en-3-yl<br>benzoate                                  | C <sub>34</sub> H <sub>50</sub> O <sub>3</sub>                 | 40824-59-7                | 506.37                | -0.00112              |
| 529 | Pheophorbide A                                                          | C <sub>35</sub> H <sub>36</sub> N <sub>4</sub> O <sub>5</sub>  | 15664-29-6                | 592.27                | -0.00176              |

Note: Annot. Delta Mass represents the difference between the actual measured value of molecular weight and the theoretical value.

**Table S2.** List of 349 non-volatile metabolites in the processing of Rizhao green tea (ESI<sup>-</sup>, C18 column).

| NO | Name                                        | Formula                                                       | CAS         | Molecular Weight (Da) | Annot.Delta Mass (Da) |
|----|---------------------------------------------|---------------------------------------------------------------|-------------|-----------------------|-----------------------|
| 1  | N-Carbobenzoxo-DL-serine                    | C <sub>11</sub> H <sub>13</sub> NO <sub>5</sub>               | 2768-56-1   | 239.08                | 0.00003               |
| 2  | Val-Val                                     | C <sub>10</sub> H <sub>20</sub> N <sub>2</sub> O <sub>3</sub> | 3918-94-3   | 216.15                | 0.00036               |
| 3  | N-Acetylvaline                              | C <sub>7</sub> H <sub>13</sub> NO <sub>3</sub>                | 3067-19-4   | 159.09                | 0.00004               |
| 4  | N-Acetyl-DL-tryptophan                      | C <sub>13</sub> H <sub>14</sub> N <sub>2</sub> O <sub>3</sub> | 87-32-1     | 246.10                | -0.00048              |
| 5  | N-Acetyl-DL-phenylalanine                   | C <sub>11</sub> H <sub>13</sub> NO <sub>3</sub>               | 2901-75-9   | 207.09                | -0.00024              |
| 6  | N-Acetyl-L-leucine                          | C <sub>8</sub> H <sub>15</sub> NO <sub>3</sub>                | 1188-21-2   | 173.11                | -0.00002              |
| 7  | N6-((Benzoyloxy)carbonyl)lysine             | C <sub>14</sub> H <sub>20</sub> N <sub>2</sub> O <sub>4</sub> | 32302-83-3  | 280.14                | 0.00053               |
| 8  | N2-(tert-Butoxycarbonyl)glutamin            | C <sub>10</sub> H <sub>18</sub> N <sub>2</sub> O <sub>5</sub> | 85535-45-1  | 246.12                | -0.00017              |
| 9  | Boc-4-Nitro-L-phenylalanine                 | C <sub>14</sub> H <sub>18</sub> N <sub>2</sub> O <sub>6</sub> | 33305-77-0  | 310.12                | -0.00009              |
| 10 | DL-Alanyl-DL-leucine                        | C <sub>9</sub> H <sub>18</sub> N <sub>2</sub> O <sub>3</sub>  | 1638-60-4   | 202.13                | -0.00001              |
| 11 | alpha-Methyl-L-tyrosine                     | C <sub>10</sub> H <sub>13</sub> NO <sub>3</sub>               | 672-87-7    | 195.09                | -0.00018              |
| 12 | L-Theanine                                  | C <sub>7</sub> H <sub>14</sub> N <sub>2</sub> O <sub>3</sub>  | 3081-61-6   | 174.10                | -0.00045              |
| 13 | L-gamma-Glutamyl-L-leucine                  | C <sub>11</sub> H <sub>20</sub> N <sub>2</sub> O <sub>5</sub> | 2566-39-4   | 260.14                | 0.00008               |
| 14 | Leu-Val                                     | C <sub>11</sub> H <sub>22</sub> N <sub>2</sub> O <sub>3</sub> | 35436-83-0  | 230.16                | -0.00016              |
| 15 | Leu-pro                                     | C <sub>11</sub> H <sub>20</sub> N <sub>2</sub> O <sub>3</sub> | 6403-35-6   | 228.15                | 0.00033               |
| 16 | Leu-Leu                                     | C <sub>12</sub> H <sub>24</sub> N <sub>2</sub> O <sub>3</sub> | 3303-31-9   | 244.18                | 0.00009               |
| 17 | Leu-Gly-Gly                                 | C <sub>10</sub> H <sub>19</sub> N <sub>3</sub> O <sub>4</sub> | 4337-37-5   | 245.14                | 0.00014               |
| 18 | Hexahydrohippuric acid                      | C <sub>9</sub> H <sub>15</sub> NO <sub>3</sub>                | 32377-88-1  | 185.10                | -0.00049              |
| 19 | Gly-Phe                                     | C <sub>11</sub> H <sub>14</sub> N <sub>2</sub> O <sub>3</sub> | 721-66-4    | 222.10                | 0.00031               |
| 20 | Gly-Leu                                     | C <sub>8</sub> H <sub>16</sub> N <sub>2</sub> O <sub>3</sub>  | 869-19-2    | 188.12                | 0.00033               |
| 21 | DL-Tryptophan                               | C <sub>11</sub> H <sub>12</sub> N <sub>2</sub> O <sub>2</sub> | 54-12-6     | 204.09                | -0.00040              |
| 22 | DL-Phenylalanine                            | C <sub>9</sub> H <sub>11</sub> NO <sub>2</sub>                | 150-30-1    | 165.08                | -0.00008              |
| 23 | Dihydroxyphenylalanine                      | C <sub>9</sub> H <sub>11</sub> NO <sub>4</sub>                | 63-84-3     | 197.07                | -0.00016              |
| 24 | Boc-Glycine                                 | C <sub>7</sub> H <sub>13</sub> NO <sub>4</sub>                | 4530-20-5   | 175.08                | 0.00016               |
| 25 | Ala-Tyr                                     | C <sub>12</sub> H <sub>16</sub> N <sub>2</sub> O <sub>4</sub> | 3061-88-9   | 252.11                | 0.00018               |
| 26 | 5-Hydroxy-DL-tryptophan                     | C <sub>11</sub> H <sub>12</sub> N <sub>2</sub> O <sub>3</sub> | 56-69-9     | 220.08                | -0.00004              |
| 27 | 2-Morpholinoacetic acid                     | C <sub>6</sub> H <sub>11</sub> NO <sub>3</sub>                | 3235-69-6   | 145.07                | -0.00011              |
| 28 | 1-(tert-Butoxycarbonyl)proline              | C <sub>10</sub> H <sub>17</sub> NO <sub>4</sub>               | 59433-50-0  | 215.12                | 0.00012               |
| 29 | 1-(Ethoxycarbonyl)proline                   | C <sub>8</sub> H <sub>13</sub> NO <sub>4</sub>                | 5700-74-3   | 187.08                | 0.00007               |
| 30 | Methyl gallate                              | C <sub>8</sub> H <sub>8</sub> O <sub>5</sub>                  | 99-24-1     | 184.04                | -0.00058              |
| 31 | Ellagic acid                                | C <sub>14</sub> H <sub>6</sub> O <sub>8</sub>                 | 476-66-4    | 302.01                | -0.00063              |
| 32 | Procyanidin B2                              | C <sub>30</sub> H <sub>26</sub> O <sub>12</sub>               | 29106-49-8  | 578.14                | -0.00124              |
| 33 | Gallic acid                                 | C <sub>7</sub> H <sub>6</sub> O <sub>5</sub>                  | 149-91-7    | 170.02                | -0.00041              |
| 34 | Digallic acid                               | C <sub>14</sub> H <sub>10</sub> O <sub>9</sub>                | 536-08-3    | 322.03                | -0.00046              |
| 35 | Epigallocatechin<br>3-O-(3-O-methyl)gallate | C <sub>23</sub> H <sub>20</sub> O <sub>11</sub>               | 83104-87-4  | 472.10                | -0.00089              |
| 36 | (-)-Epigallocatechin<br>3'-O-glucuronide    | C <sub>21</sub> H <sub>22</sub> O <sub>13</sub>               | 569670-41-3 | 482.11                | -0.00003              |
| 37 | (+)-Gallocatechin                           | C <sub>15</sub> H <sub>14</sub> O <sub>7</sub>                | 970-73-0    | 306.07                | -0.00074              |
| 38 | (-)-Epigallocatechin gallate                | C <sub>22</sub> H <sub>18</sub> O <sub>11</sub>               | 989-51-5    | 458.08                | -0.00118              |

| NO | Name                                           | Formula                                                                        | CAS                       | Molecular Weight (Da) | Annot.Delta Mass (Da) |
|----|------------------------------------------------|--------------------------------------------------------------------------------|---------------------------|-----------------------|-----------------------|
| 39 | (-)-Epiafzelechin 3-O-gallate                  | C <sub>22</sub> H <sub>18</sub> O <sub>9</sub>                                 | 108907-43-3               | 426.09                | -0.00052              |
| 40 | Epicatechin<br>3-O-(3-O-methylgallate)         | C <sub>23</sub> H <sub>20</sub> O <sub>10</sub>                                | 83104-86-3                | 456.11                | -0.00029              |
| 41 | (-)-Epicatechin gallate                        | C <sub>22</sub> H <sub>18</sub> O <sub>10</sub>                                | 1257-08-5                 | 442.09                | -0.00131              |
| 42 | Epitheaflagallin 3-O-gallate                   | C <sub>27</sub> H <sub>20</sub> O <sub>13</sub>                                | 102067-92-5               | 552.09                | -0.00008              |
| 43 | Methylgallic acid-O-sulphate                   | C <sub>8</sub> H <sub>8</sub> O <sub>8</sub> S                                 | ChemSpider ID<br>30778507 | 263.99                | 0.00020               |
| 44 | 5-Sulfosalicylic acid                          | C <sub>7</sub> H <sub>6</sub> O <sub>6</sub> S                                 | 97-05-2                   | 217.99                | 0.00005               |
| 45 | Sinapinic acid                                 | C <sub>11</sub> H <sub>12</sub> O <sub>5</sub>                                 | 530-59-6                  | 224.07                | -0.00033              |
| 46 | Salicylic acid                                 | C <sub>7</sub> H <sub>6</sub> O <sub>3</sub>                                   | 69-72-7                   | 138.03                | -0.00067              |
| 47 | Protocatechuic acid                            | C <sub>7</sub> H <sub>6</sub> O <sub>4</sub>                                   | 99-50-3                   | 154.03                | -0.00054              |
| 48 | Coniferyl ferulate                             | C <sub>20</sub> H <sub>20</sub> O <sub>6</sub>                                 | 63644-62-2                | 356.13                | 0.00005               |
| 49 | Chlorogenic acid                               | C <sub>16</sub> H <sub>18</sub> O <sub>9</sub>                                 | 327-97-9                  | 354.09                | -0.00043              |
| 50 | Caftaric acid                                  | C <sub>13</sub> H <sub>12</sub> O <sub>9</sub>                                 | 67879-58-7                | 312.05                | 0.00030               |
| 51 | 3,4-Dihydroxyphenylpyruvic acid                | C <sub>9</sub> H <sub>8</sub> O <sub>5</sub>                                   | 4228-66-4                 | 196.04                | -0.00011              |
| 52 | 3,4-Dihydroxyphenylacetic acid                 | C <sub>8</sub> H <sub>8</sub> O <sub>4</sub>                                   | 102-32-9                  | 168.04                | -0.00013              |
| 53 | Theaflavic acid                                | C <sub>21</sub> H <sub>16</sub> O <sub>10</sub>                                | 30407-93-3                | 428.07                | -0.00066              |
| 54 | 2-Protocatechuoyl<br>phloroglucinolcarboxylate | C <sub>14</sub> H <sub>10</sub> O <sub>8</sub>                                 | 30048-34-1                | 306.04                | -0.00021              |
| 55 | 2-Caffeoylisocitric acid                       | C <sub>15</sub> H <sub>14</sub> O <sub>10</sub>                                | ChemSpider ID<br>4444181  | 354.06                | -0.00030              |
| 56 | (+)-Chebulic acid                              | C <sub>14</sub> H <sub>12</sub> O <sub>11</sub>                                | ChemSpider ID<br>35014171 | 356.04                | -0.00029              |
| 57 | 4-Hydroxycinnamic acid                         | C <sub>9</sub> H <sub>8</sub> O <sub>3</sub>                                   | 501-98-4                  | 164.05                | -0.00029              |
| 58 | Xanthosine                                     | C <sub>10</sub> H <sub>12</sub> N <sub>4</sub> O <sub>6</sub>                  | 146-80-5                  | 284.08                | -0.00001              |
| 59 | Thymidine                                      | C <sub>10</sub> H <sub>14</sub> N <sub>2</sub> O <sub>5</sub>                  | 50-89-5                   | 242.09                | -0.00031              |
| 60 | Succinyladenosine                              | C <sub>14</sub> H <sub>17</sub> N <sub>5</sub> O <sub>8</sub>                  | 4542-23-8                 | 383.11                | 0.00035               |
| 61 | N-Acetylcytidine                               | C <sub>11</sub> H <sub>15</sub> N <sub>3</sub> O <sub>6</sub>                  | 3768-18-1                 | 285.10                | 0.00030               |
| 62 | 1-Methylxanthine                               | C <sub>6</sub> H <sub>6</sub> N <sub>4</sub> O <sub>2</sub>                    | 6136-37-4                 | 166.05                | -0.00018              |
| 63 | Guanine                                        | C <sub>5</sub> H <sub>5</sub> N <sub>5</sub> O                                 | 73-40-5                   | 151.05                | -0.00022              |
| 64 | Deoxyuridine                                   | C <sub>9</sub> H <sub>12</sub> N <sub>2</sub> O <sub>5</sub>                   | 951-78-0                  | 228.07                | 0.00024               |
| 65 | Deoxyinosine                                   | C <sub>10</sub> H <sub>12</sub> N <sub>4</sub> O <sub>4</sub>                  | 890-38-0                  | 252.09                | -0.00003              |
| 66 | Cyclic di-AMP                                  | C <sub>20</sub> H <sub>24</sub> N <sub>10</sub> O <sub>12</sub> P <sub>2</sub> | 54447-84-6                | 658.10                | -0.00014              |
| 67 | c-GMP-AMP                                      | C <sub>20</sub> H <sub>24</sub> N <sub>10</sub> O <sub>13</sub> P <sub>2</sub> | 849214-04-6               | 674.10                | -0.00007              |
| 68 | Arabinosylhypoxanthine                         | C <sub>10</sub> H <sub>12</sub> N <sub>4</sub> O <sub>5</sub>                  | 7013-16-3                 | 268.08                | -0.00001              |
| 69 | Adenine                                        | C <sub>5</sub> H <sub>5</sub> N <sub>5</sub>                                   | 73-24-5                   | 135.05                | -0.00005              |
| 70 | 8-Hydroxy-2'-deoxyguanosine                    | C <sub>10</sub> H <sub>13</sub> N <sub>5</sub> O <sub>5</sub>                  | 88847-89-6                | 283.09                | -0.00041              |
| 71 | 5-Methyluridine                                | C <sub>10</sub> H <sub>14</sub> N <sub>2</sub> O <sub>6</sub>                  | 1463-10-1                 | 258.09                | 0.00000               |
| 72 | Theogallin                                     | C <sub>14</sub> H <sub>16</sub> O <sub>10</sub>                                | 17365-11-6                | 344.07                | -0.00125              |
| 73 | Theasinensin A                                 | C <sub>44</sub> H <sub>34</sub> O <sub>22</sub>                                | 89064-31-3                | 914.15                | -0.00056              |

| NO  | Name                                           | Formula                                         | CAS        | Molecular Weight (Da) | Annot.Delta Mass (Da) |
|-----|------------------------------------------------|-------------------------------------------------|------------|-----------------------|-----------------------|
| 74  | Taxifolin                                      | C <sub>15</sub> H <sub>12</sub> O <sub>7</sub>  | 480-18-2   | 304.06                | -0.00020              |
| 75  | Swertianolin                                   | C <sub>20</sub> H <sub>20</sub> O <sub>11</sub> | 23445-00-3 | 436.10                | -0.00017              |
| 76  | Scutellarin                                    | C <sub>21</sub> H <sub>18</sub> O <sub>12</sub> | 27740-01-8 | 462.08                | 0.00002               |
| 77  | Apigenin-7-O-rhamnoglucoside                   | C <sub>27</sub> H <sub>30</sub> O <sub>14</sub> | 17306-46-6 | 578.16                | -0.00118              |
| 78  | Quercitrin                                     | C <sub>21</sub> H <sub>20</sub> O <sub>11</sub> | 522-12-3   | 448.10                | -0.00100              |
| 79  | Naringenin-7-O-glucoside                       | C <sub>21</sub> H <sub>22</sub> O <sub>10</sub> | 529-55-5   | 434.12                | -0.00049              |
| 80  | Plantagoside                                   | C <sub>21</sub> H <sub>22</sub> O <sub>12</sub> | 78708-33-5 | 466.11                | -0.00065              |
| 81  | Kaempferol                                     | C <sub>15</sub> H <sub>10</sub> O <sub>6</sub>  | 520-18-3   | 286.05                | -0.00023              |
| 82  | 3',4',5,7-Tetrahydroxyflavanone                | C <sub>15</sub> H <sub>12</sub> O <sub>6</sub>  | 4049-38-1  | 288.06                | 0.00019               |
| 83  | Cianidanol                                     | C <sub>15</sub> H <sub>14</sub> O <sub>6</sub>  | 154-23-4   | 290.08                | -0.00078              |
| 84  | 5,7,3',4'-Tetrahydroxy-3,6,8-trimethoxyflavone | C <sub>18</sub> H <sub>16</sub> O <sub>9</sub>  | 61451-85-2 | 376.08                | -0.00057              |
| 85  | 3,4,5,7,3',4',5'-Heptahydroxyflavan            | C <sub>15</sub> H <sub>14</sub> O <sub>8</sub>  | 491-52-1   | 322.07                | -0.00084              |
| 86  | 4',5,7-Trihydroxyflavanone                     | C <sub>15</sub> H <sub>12</sub> O <sub>5</sub>  | 67604-48-2 | 272.07                | -0.00039              |
| 87  | Phloretin                                      | C <sub>15</sub> H <sub>14</sub> O <sub>5</sub>  | 60-82-2    | 274.08                | -0.00009              |
| 88  | 6-Methoxyquercetin                             | C <sub>16</sub> H <sub>12</sub> O <sub>8</sub>  | 519-96-0   | 332.05                | -0.00014              |
| 89  | Kaempferol-3-O-rutinoside                      | C <sub>27</sub> H <sub>30</sub> O <sub>15</sub> | 17650-84-9 | 594.16                | -0.00128              |
| 90  | Miquelianin                                    | C <sub>21</sub> H <sub>18</sub> O <sub>13</sub> | 22688-79-5 | 478.07                | -0.00079              |
| 91  | Kaempferol 3-arabinofuranoside                 | C <sub>20</sub> H <sub>18</sub> O <sub>10</sub> | 5041-67-8  | 418.09                | -0.00063              |
| 92  | Isoquercetin                                   | C <sub>21</sub> H <sub>20</sub> O <sub>12</sub> | 482-35-9   | 464.09                | -0.00078              |
| 93  | Salvigenin                                     | C <sub>18</sub> H <sub>16</sub> O <sub>6</sub>  | 19103-54-9 | 328.09                | -0.00038              |
| 94  | Gossypin                                       | C <sub>21</sub> H <sub>20</sub> O <sub>13</sub> | 652-78-8   | 480.09                | -0.00086              |
| 95  | Eucalyptin                                     | C <sub>19</sub> H <sub>18</sub> O <sub>5</sub>  | 3122-88-1  | 326.12                | -0.00018              |
| 96  | Dihydromyricetin                               | C <sub>15</sub> H <sub>12</sub> O <sub>8</sub>  | 27200-12-0 | 320.05                | -0.00025              |
| 97  | Baicalin                                       | C <sub>21</sub> H <sub>18</sub> O <sub>11</sub> | 21967-41-9 | 446.08                | -0.00037              |
| 98  | Quercetin                                      | C <sub>20</sub> H <sub>18</sub> O <sub>11</sub> | 572-30-5   | 434.08                | -0.00033              |
| 99  | 3-O-alpha-L-arabinopyranoside                  | C <sub>21</sub> H <sub>22</sub> O <sub>11</sub> | 29838-67-3 | 450.12                | -0.00053              |
| 100 | 5,7-Dihydroxy-3',4',5'-trimethoxyflavanone     | C <sub>18</sub> H <sub>18</sub> O <sub>7</sub>  | 62252-10-2 | 346.11                | 0.00011               |
| 101 | Scoparone                                      | C <sub>11</sub> H <sub>10</sub> O <sub>4</sub>  | 120-08-1   | 206.06                | -0.00033              |
| 102 | 4-Methylumbelliferyl-beta-D-glucuronide        | C <sub>16</sub> H <sub>16</sub> O <sub>9</sub>  | 6160-80-1  | 352.08                | 0.00029               |
| 103 | 4-Methylumbelliferyl-beta-D-glucopyranoside    | C <sub>16</sub> H <sub>18</sub> O <sub>8</sub>  | 18997-57-4 | 338.10                | -0.00089              |
| 104 | 7-Ethoxy-4-methylcoumarin                      | C <sub>12</sub> H <sub>12</sub> O <sub>3</sub>  | 87-05-8    | 204.08                | -0.00007              |
| 105 | 4-Hydroxycoumarin                              | C <sub>9</sub> H <sub>6</sub> O <sub>3</sub>    | 1076-38-6  | 162.03                | -0.00029              |
| 106 | Coumarin                                       | C <sub>9</sub> H <sub>6</sub> O <sub>2</sub>    | 91-64-5    | 146.04                | 0.00014               |
| 107 | Aesculin                                       | C <sub>15</sub> H <sub>16</sub> O <sub>9</sub>  | 531-75-9   | 340.08                | 0.00002               |
| 108 | 7-Ethoxycoumarin                               | C <sub>11</sub> H <sub>10</sub> O <sub>3</sub>  | 31005-02-4 | 190.06                | -0.00011              |
| 109 | 4-Methyl-6,7-diacetoxycoumarin                 | C <sub>14</sub> H <sub>12</sub> O <sub>6</sub>  | 55939-28-1 | 276.06                | -0.00016              |
| 110 | 4,5,7-Trihydroxycoumarin                       | C <sub>9</sub> H <sub>6</sub> O <sub>5</sub>    | 17575-26-7 | 194.02                | -0.00027              |

| NO  | Name                                                            | Formula                                                       | CAS                       | Molecular Weight (Da) | Annot.Delta Mass (Da) |
|-----|-----------------------------------------------------------------|---------------------------------------------------------------|---------------------------|-----------------------|-----------------------|
| 111 | Vanillin                                                        | C <sub>8</sub> H <sub>8</sub> O <sub>3</sub>                  | 121-33-5                  | 152.05                | -0.00053              |
| 112 | Trimethyl<br>4-hydroxy-5-methyl-1,2,3-benzenet<br>ricarboxylate | C <sub>13</sub> H <sub>14</sub> O <sub>7</sub>                | ChemSpider ID<br>538404   | 282.07                | -0.00084              |
| 113 | Triethyl<br>1,3,5-benzenetricarboxylate                         | C <sub>15</sub> H <sub>18</sub> O <sub>6</sub>                | 4105-92-4                 | 294.11                | 0.00018               |
| 114 | 4-(3-Butoxy-4-methoxybenzyl)-2-i<br>midazolidinone              | C <sub>15</sub> H <sub>22</sub> N <sub>2</sub> O <sub>3</sub> | 29925-17-5                | 278.16                | 0.00033               |
| 115 | Pyrogallol                                                      | C <sub>6</sub> H <sub>6</sub> O <sub>3</sub>                  | 87-66-1                   | 126.03                | -0.00011              |
| 116 | Oxydi-3,1,2-propanetriyl<br>tetrabutanoate                      | C <sub>22</sub> H <sub>38</sub> O <sub>9</sub>                | ChemSpider ID<br>479813   | 446.25                | -0.00022              |
| 117 | N-(5-Phenyl-1H-1,2,4-triazol-3-yl)b<br>enzamide                 | C <sub>15</sub> H <sub>12</sub> N <sub>4</sub> O              | ChemSpider ID<br>495787   | 264.10                | -0.00121              |
| 118 | Monobutyrim                                                     | C <sub>7</sub> H <sub>14</sub> O <sub>4</sub>                 | 557-25-5                  | 162.09                | 0.00005               |
| 119 | 6-Methyl-5-hepten-2-one                                         | C <sub>8</sub> H <sub>14</sub> O                              | 110-93-0                  | 126.10                | 0.00009               |
| 120 | Lauric anhydride                                                | C <sub>24</sub> H <sub>46</sub> O <sub>3</sub>                | 645-66-9                  | 382.35                | 0.00057               |
| 121 | Methyl p-toluenesulfonate                                       | C <sub>8</sub> H <sub>10</sub> O <sub>3</sub> S               | 80-48-8                   | 186.04                | 0.00026               |
| 122 | Methyl<br>alpha-aspartylphenylalaninate                         | C <sub>14</sub> H <sub>18</sub> N <sub>2</sub> O <sub>5</sub> | 22839-65-2                | 294.12                | 0.00064               |
| 123 | Methyl 3-hydroxydodecanoate                                     | C <sub>13</sub> H <sub>26</sub> O <sub>3</sub>                | 72864-23-4                | 230.19                | 0.00011               |
| 124 | Methyl<br>3,5-di-tert-butyl-4-hydroxybenzoate                   | C <sub>16</sub> H <sub>24</sub> O <sub>3</sub>                | 2511-22-0                 | 264.17                | 0.00011               |
| 125 | Maclurin                                                        | C <sub>13</sub> H <sub>10</sub> O <sub>6</sub>                | 519-34-6                  | 262.05                | 0.00010               |
| 126 | Indole                                                          | C <sub>8</sub> H <sub>7</sub> N                               | 120-72-9                  | 117.06                | -0.00004              |
| 127 | Hexyl fumarate                                                  | C <sub>16</sub> H <sub>28</sub> O <sub>4</sub>                | 19139-31-2                | 284.20                | 0.00022               |
| 128 | Heptanoic anhydride                                             | C <sub>14</sub> H <sub>26</sub> O <sub>3</sub>                | 626-27-7                  | 242.19                | 0.00016               |
| 129 | Guaiacol sulfate                                                | C <sub>7</sub> H <sub>8</sub> O <sub>5</sub> S                | 3233-59-8                 | 204.01                | 0.00008               |
| 130 | Guaiacol                                                        | C <sub>7</sub> H <sub>8</sub> O <sub>2</sub>                  | 544-31-0                  | 124.05                | 0.00025               |
| 131 | Diethylene glycol monolaurate                                   | C <sub>16</sub> H <sub>32</sub> O <sub>4</sub>                | 141-20-8                  | 288.23                | 0.00008               |
| 132 | 2-Hydroxyquinoline                                              | C <sub>9</sub> H <sub>7</sub> NO                              | 59-31-4                   | 145.05                | 0.00012               |
| 133 | Ethyl p-hydroxybenzoate                                         | C <sub>9</sub> H <sub>10</sub> O <sub>3</sub>                 | 120-47-8                  | 166.06                | 0.00009               |
| 134 | Ethylene dodecanedioate                                         | C <sub>14</sub> H <sub>24</sub> O <sub>4</sub>                | 54982-83-1                | 256.17                | 0.00013               |
| 135 | Ethyl lactate                                                   | C <sub>5</sub> H <sub>10</sub> O <sub>3</sub>                 | 97-64-3                   | 118.06                | -0.00044              |
| 136 | Ethyl cinnamate                                                 | C <sub>11</sub> H <sub>12</sub> O <sub>2</sub>                | 103-36-6                  | 176.08                | 0.00008               |
| 137 | Ethyl 2-oxocyclohexanecarboxylate                               | C <sub>9</sub> H <sub>14</sub> O <sub>3</sub>                 | 1655-07-8                 | 170.09                | -0.00009              |
| 138 | Ethyl 2-acetylheptanoate                                        | C <sub>11</sub> H <sub>20</sub> O <sub>3</sub>                | 24317-94-0                | 200.14                | -0.00009              |
| 139 | Epicatechin-3'-sulfate                                          | C <sub>15</sub> H <sub>14</sub> O <sub>9</sub> S              | 1038922-77-8              | 370.04                | 0.00006               |
| 140 | 6-Nitroveratraldehyde                                           | C <sub>9</sub> H <sub>9</sub> NO <sub>5</sub>                 | 20357-25-9                | 211.05                | 0.00004               |
| 141 | Di-tert-butyl malonate                                          | C <sub>11</sub> H <sub>20</sub> O <sub>4</sub>                | 541-16-2                  | 216.14                | 0.00017               |
| 142 | Diphenol glucuronide                                            | C <sub>12</sub> H <sub>14</sub> O <sub>8</sub>                | ChemSpider ID<br>30778502 | 286.07                | -0.00028              |
| 143 | Dimethyl itaconate                                              | C <sub>7</sub> H <sub>10</sub> O <sub>4</sub>                 | 617-52-7                  | 158.06                | -0.00014              |

| NO  | Name                                               | Formula                                         | CAS                     | Molecular Weight (Da) | Annot.Delta Mass (Da) |
|-----|----------------------------------------------------|-------------------------------------------------|-------------------------|-----------------------|-----------------------|
| 144 | Dimethyl 2,3-bis(1-methoxyethoxy)succinate         | C <sub>12</sub> H <sub>22</sub> O <sub>8</sub>  | ChemSpider ID<br>476915 | 294.13                | 0.00003               |
| 145 | Dimethyl 1,4-cyclohexanedicarboxylate              | C <sub>10</sub> H <sub>16</sub> O <sub>4</sub>  | 94-60-0                 | 200.10                | -0.00011              |
| 146 | Dimedone                                           | C <sub>8</sub> H <sub>12</sub> O <sub>2</sub>   | 126-81-8                | 140.08                | 0.00004               |
| 147 | Diethyl tartrate                                   | C <sub>8</sub> H <sub>14</sub> O <sub>6</sub>   | 13811-71-7              | 206.08                | -0.00013              |
| 148 | Diethyl phosphate                                  | C <sub>4</sub> H <sub>11</sub> O <sub>4</sub> P | 598-02-7                | 154.04                | 0.00013               |
| 149 | Diethyl malonate                                   | C <sub>7</sub> H <sub>12</sub> O <sub>4</sub>   | 105-53-3                | 160.07                | 0.00011               |
| 150 | Diethyl benzoylmalonate                            | C <sub>14</sub> H <sub>16</sub> O <sub>5</sub>  | 1087-97-4               | 264.10                | 0.00003               |
| 151 | Dibutyl malate                                     | C <sub>12</sub> H <sub>22</sub> O <sub>5</sub>  | 6280-99-5               | 246.15                | -0.00015              |
| 152 | Dibutyl itaconate                                  | C <sub>13</sub> H <sub>22</sub> O <sub>4</sub>  | 2155-60-4               | 242.15                | -0.00008              |
| 153 | Dibutyl Fumarate                                   | C <sub>12</sub> H <sub>20</sub> O <sub>4</sub>  | 105-75-9                | 228.14                | -0.00007              |
| 154 | Ethyl p-methoxycinnamate                           | C <sub>12</sub> H <sub>14</sub> O <sub>3</sub>  | 24393-56-4              | 206.09                | 0.00017               |
| 155 | Diallyl phthalate                                  | C <sub>14</sub> H <sub>14</sub> O <sub>4</sub>  | 131-17-9                | 246.09                | -0.00053              |
| 156 | Coumarone                                          | C <sub>8</sub> H <sub>6</sub> O                 | 271-89-6                | 118.04                | -0.00017              |
| 157 | Caproic anhydride                                  | C <sub>12</sub> H <sub>22</sub> O <sub>3</sub>  | 2051-49-2               | 214.16                | -0.00010              |
| 158 | Butylphthalide                                     | C <sub>12</sub> H <sub>14</sub> O <sub>2</sub>  | 6066-49-5               | 190.10                | -0.00011              |
| 159 | Butyl acrylate                                     | C <sub>7</sub> H <sub>12</sub> O <sub>2</sub>   | 141-32-2                | 128.08                | 0.00000               |
| 160 | Bis(2-methoxyethyl) tartarate                      | C <sub>10</sub> H <sub>18</sub> O <sub>8</sub>  | ChemSpider ID<br>476785 | 266.10                | -0.00015              |
| 161 | Bis(2-butoxyethyl) adipate                         | C <sub>18</sub> H <sub>34</sub> O <sub>6</sub>  | 141-18-4                | 346.24                | -0.00035              |
| 162 | Benzoquinone                                       | C <sub>6</sub> H <sub>4</sub> O <sub>2</sub>    | 106-51-4                | 108.02                | 0.00006               |
| 163 | Phenol                                             | C <sub>6</sub> H <sub>6</sub> O                 | 108-95-2                | 94.04                 | 0.00001               |
| 164 | Bellidifolin                                       | C <sub>14</sub> H <sub>10</sub> O <sub>6</sub>  | 2798-25-6               | 274.05                | 0.00007               |
| 165 | Atranorin                                          | C <sub>19</sub> H <sub>18</sub> O <sub>8</sub>  | 479-20-9                | 374.10                | 0.00005               |
| 166 | Ethyl benzoylacetate                               | C <sub>11</sub> H <sub>12</sub> O <sub>3</sub>  | 94-02-0                 | 192.08                | -0.00005              |
| 167 | Acetophenone                                       | C <sub>8</sub> H <sub>8</sub> O                 | 98-86-2                 | 120.06                | -0.00003              |
| 168 | Aceglatone                                         | C <sub>10</sub> H <sub>10</sub> O <sub>8</sub>  | 642-83-1                | 258.04                | 0.00003               |
| 169 | 7-Benzyl-2-(4-bromophenyl)-6-methylindolizine      | C <sub>22</sub> H <sub>18</sub> BrN             | ChemSpider ID<br>549718 | 375.06                | 0.00129               |
| 170 | 6-Oxododecanedioic acid                            | C <sub>12</sub> H <sub>20</sub> O <sub>5</sub>  | 4132-62-1               | 244.13                | 0.00003               |
| 171 | 6-Acetyl-4,5,7,8-tetrahydroxynaphthalene-1,2-dione | C <sub>12</sub> H <sub>8</sub> O <sub>7</sub>   | 3718-80-7               | 264.03                | -0.00078              |
| 172 | 5-Benzylidene-2,2-dimethyl-1,3-dioxane-4,6-dione   | C <sub>13</sub> H <sub>12</sub> O <sub>4</sub>  | 1214-54-6               | 232.07                | -0.00031              |
| 173 | Spinochrome M                                      | C <sub>12</sub> H <sub>10</sub> O <sub>6</sub>  | 2808-46-0               | 250.05                | -0.00007              |
| 174 | 4-Phenolsulfonic acid                              | C <sub>6</sub> H <sub>6</sub> O <sub>4</sub> S  | 98-67-9                 | 174.00                | 0.00036               |
| 175 | Vanillin 4-sulfate                                 | C <sub>8</sub> H <sub>8</sub> O <sub>6</sub> S  | 744984-09-6             | 232.00                | -0.00016              |
| 176 | 4,6-Di-tert-Butylpyrogallol                        | C <sub>14</sub> H <sub>22</sub> O <sub>3</sub>  | 3934-77-8               | 238.16                | 0.00006               |
| 177 | 3-Decyloxolane-2,5-dione                           | C <sub>14</sub> H <sub>24</sub> O <sub>3</sub>  | 18470-76-3              | 240.17                | 0.00007               |
| 178 | 3,5-Ditert-butyl-4-hydroxybenzaldehyde             | C <sub>15</sub> H <sub>22</sub> O <sub>2</sub>  | 1620-98-0               | 234.16                | -0.00011              |

| NO  | Name                                                         | Formula                                                         | CAS                      | Molecular Weight (Da) | Annot.Delta Mass (Da) |
|-----|--------------------------------------------------------------|-----------------------------------------------------------------|--------------------------|-----------------------|-----------------------|
| 179 | Schizotenuin F                                               | C <sub>28</sub> H <sub>24</sub> O <sub>12</sub>                 | 127498-36-6              | 552.13                | -0.00066              |
| 180 | 2-O-Acetylmalic Anhydride                                    | C <sub>6</sub> H <sub>6</sub> O <sub>5</sub>                    | 24766-96-9               | 158.02                | -0.00048              |
| 181 | 2-Methyl-3-(2-pyridin-4-yl-thiazol-4-yl)-1H-indole           | C <sub>17</sub> H <sub>13</sub> N <sub>3</sub> S                | ChemSpider ID<br>620846  | 291.08                | -0.00099              |
| 182 | 2-Hydroxy-6-ketononadienedioic acid                          | C <sub>9</sub> H <sub>10</sub> O <sub>6</sub>                   | ChemSpider ID<br>4444276 | 214.05                | -0.00042              |
| 183 | 2-Acetoxy-3-[3-(4-hydroxy-phenyl)-acryloyloxy]-succinic acid | C <sub>15</sub> H <sub>14</sub> O <sub>9</sub>                  | 106928-35-2              | 338.06                | -0.00042              |
| 184 | 2,7-Dimethoxynaphthalene                                     | C <sub>12</sub> H <sub>12</sub> O <sub>2</sub>                  | 3469-26-9                | 188.08                | -0.00002              |
| 185 | 1-O-Galloylglycerol                                          | C <sub>10</sub> H <sub>12</sub> O <sub>7</sub>                  | 87087-60-3               | 244.06                | -0.00044              |
| 186 | 2,3,4,5-Tetrahydroxy-N-nonylpentanamide                      | C <sub>14</sub> H <sub>29</sub> NO <sub>5</sub>                 | ChemSpider ID<br>480198  | 291.20                | 0.00004               |
| 187 | 2-(4-Methoxyphenyl)-1,3-dithiolane                           | C <sub>10</sub> H <sub>12</sub> OS <sub>2</sub>                 | 6712-20-5                | 212.03                | -0.00050              |
| 188 | 2-(2-(Benzoyloxy)propoxy)propyl benzoate                     | C <sub>20</sub> H <sub>22</sub> O <sub>5</sub>                  | 20109-39-1               | 342.15                | -0.00046              |
| 189 | 1'-Acetoxychavicol acetate                                   | C <sub>13</sub> H <sub>14</sub> O <sub>4</sub>                  | 52946-22-2               | 234.09                | -0.00031              |
| 190 | 1,4,7,10,13-Pentaoxacyclopentadecane                         | C <sub>10</sub> H <sub>20</sub> O <sub>5</sub>                  | 33100-27-5               | 220.13                | 0.00017               |
| 191 | 15,15'-Bi(1,4,7,10,13-pentaoxacyclohexadecane)               | C <sub>22</sub> H <sub>42</sub> O <sub>10</sub>                 | ChemSpider ID<br>487416  | 466.28                | -0.00029              |
| 192 | 1,6-Hexanediol diacrylate                                    | C <sub>12</sub> H <sub>18</sub> O <sub>4</sub>                  | 13048-33-4               | 226.12                | -0.00023              |
| 193 | 1,2,3,4,5,6-Heptanehexayl hexaacetate                        | C <sub>19</sub> H <sub>28</sub> O <sub>12</sub>                 | ChemSpider ID<br>470156  | 448.16                | -0.00036              |
| 194 | 1-(4-Chloro-2-nitrophenyl)piperidine                         | C <sub>11</sub> H <sub>13</sub> ClN <sub>2</sub> O <sub>2</sub> | 33784-44-0               | 240.07                | 0.00032               |
| 195 | 2-Amino-2-methylpropanenitrile                               | C <sub>6</sub> H <sub>11</sub> NO <sub>4</sub>                  | 19355-69-2               | 161.07                | 0.00005               |
| 196 | (Hydroxyethyl)methacrylate                                   | C <sub>6</sub> H <sub>10</sub> O <sub>3</sub>                   | 868-77-9                 | 130.06                | 0.00018               |
| 197 | (2-Dodecen-1-yl)succinic anhydride                           | C <sub>16</sub> H <sub>26</sub> O <sub>3</sub>                  | 19780-11-1               | 266.19                | 0.00005               |
| 198 | Riboflavin                                                   | C <sub>17</sub> H <sub>20</sub> N <sub>4</sub> O <sub>6</sub>   | 83-88-5                  | 376.14                | 0.00037               |
| 199 | 1,3-Dicaffeoylquinic acid                                    | C <sub>25</sub> H <sub>24</sub> O <sub>12</sub>                 | 30964-13-7               | 516.13                | -0.00072              |
| 200 | Hydroquinone                                                 | C <sub>6</sub> H <sub>6</sub> O <sub>2</sub>                    | 123-31-9                 | 110.04                | -0.00032              |
| 201 | Eugenol                                                      | C <sub>10</sub> H <sub>12</sub> O <sub>2</sub>                  | 97-53-0                  | 164.08                | -0.00007              |
| 202 | Curcumin II                                                  | C <sub>20</sub> H <sub>18</sub> O <sub>5</sub>                  | 22608-11-3               | 338.12                | -0.00007              |
| 203 | Theophylline                                                 | C <sub>7</sub> H <sub>8</sub> N <sub>4</sub> O <sub>2</sub>     | 58-55-9                  | 180.06                | -0.00032              |
| 204 | Paucin                                                       | C <sub>23</sub> H <sub>32</sub> O <sub>10</sub>                 | 26836-43-1               | 468.20                | -0.00207              |
| 205 | Vanilloloside                                                | C <sub>14</sub> H <sub>20</sub> O <sub>8</sub>                  | 74950-96-2               | 316.12                | 0.00002               |
| 206 | Sweroside                                                    | C <sub>16</sub> H <sub>22</sub> O <sub>9</sub>                  | 14215-86-2               | 358.13                | -0.00036              |
| 207 | Sinapaldehyde glucoside                                      | C <sub>17</sub> H <sub>22</sub> O <sub>9</sub>                  | 154461-65-1              | 370.13                | 0.00005               |
| 208 | (2S)-2-(beta-D-Glucopyranosyloxy)-3-methyl-3-butenenitrile   | C <sub>11</sub> H <sub>17</sub> NO <sub>6</sub>                 | 66871-89-4               | 259.11                | -0.00023              |
| 209 | Piceid                                                       | C <sub>20</sub> H <sub>22</sub> O <sub>8</sub>                  | 65914-17-2               | 390.13                | 0.00024               |

| NO  | Name                                                               | Formula                                         | CAS                       | Molecular Weight (Da) | Annot.Delta Mass (Da) |
|-----|--------------------------------------------------------------------|-------------------------------------------------|---------------------------|-----------------------|-----------------------|
| 210 | Neohesperidose                                                     | C <sub>12</sub> H <sub>22</sub> O <sub>10</sub> | 17074-02-1                | 326.12                | -0.00028              |
| 211 | Methyl<br>2,3,6-tri-O-acetyl-4-O-octylhexopyranoside               | C <sub>21</sub> H <sub>36</sub> O <sub>9</sub>  | ChemSpider ID<br>470432   | 432.24                | -0.00021              |
| 212 | Methyl<br>2,3,4-tri-O-acetyl-1-O-benzoylhexopyranuronate           | C <sub>20</sub> H <sub>22</sub> O <sub>11</sub> | ChemSpider ID<br>494836   | 438.12                | -0.00013              |
| 213 | Khellol glucoside                                                  | C <sub>19</sub> H <sub>20</sub> O <sub>10</sub> | 17226-75-4                | 408.11                | -0.00016              |
| 214 | Indoxyl beta-D-glucoside                                           | C <sub>14</sub> H <sub>17</sub> NO <sub>6</sub> | 487-60-5                  | 295.11                | -0.00059              |
| 215 | alpha-D-Mannose                                                    | C <sub>6</sub> H <sub>12</sub> O <sub>6</sub>   | 7296-15-3                 | 180.06                | 0.00008               |
| 216 | 1-Galloyl-beta-D-glucose                                           | C <sub>13</sub> H <sub>16</sub> O <sub>10</sub> | 13405-60-2                | 332.07                | -0.00030              |
| 217 | Geranyl beta-D-glucopyranoside                                     | C <sub>16</sub> H <sub>28</sub> O <sub>6</sub>  | 22850-13-1                | 316.19                | 0.00027               |
| 218 | Eriocitrin                                                         | C <sub>27</sub> H <sub>32</sub> O <sub>15</sub> | 13463-28-0                | 596.17                | -0.00097              |
| 219 | Dihydrophaseic acid<br>4-O-beta-D-glucoside                        | C <sub>21</sub> H <sub>32</sub> O <sub>10</sub> | ChemSpider ID<br>10160748 | 444.20                | -0.00028              |
| 220 | Caffeic acid 3-glucoside                                           | C <sub>15</sub> H <sub>18</sub> O <sub>9</sub>  | 24959-81-7                | 342.09                | -0.00041              |
| 221 | beta-Syringin                                                      | C <sub>17</sub> H <sub>24</sub> O <sub>9</sub>  | 118-34-3                  | 372.14                | -0.00017              |
| 222 | beta-D-Glucose pentaacetate                                        | C <sub>16</sub> H <sub>22</sub> O <sub>11</sub> | 604-69-3                  | 390.12                | -0.00011              |
| 223 | Benzyl beta-primeveroside                                          | C <sub>18</sub> H <sub>26</sub> O <sub>10</sub> | 130622-31-0               | 402.15                | -0.00073              |
| 224 | Apiin                                                              | C <sub>26</sub> H <sub>28</sub> O <sub>14</sub> | ChemSpider ID<br>4444321  | 564.15                | -0.00160              |
| 225 | 5,6-Bis-O-(2-oxopropyl)hexose                                      | C <sub>12</sub> H <sub>20</sub> O <sub>8</sub>  | ChemSpider ID<br>468771   | 292.12                | 0.00020               |
| 226 | Dihydrocaffeic acid<br>3-O-glucuronide                             | C <sub>15</sub> H <sub>18</sub> O <sub>10</sub> | 1187945-71-6              | 358.09                | -0.00025              |
| 227 | Dihydroferulic acid<br>4-O-glucuronide                             | C <sub>16</sub> H <sub>20</sub> O <sub>10</sub> | 86321-28-0                | 372.11                | -0.00038              |
| 228 | 2-Methoxyphenyl<br>6-O-beta-D-xylopyranosyl-beta-D-glucopyranoside | C <sub>18</sub> H <sub>26</sub> O <sub>11</sub> | ChemSpider ID<br>58837448 | 418.15                | -0.00019              |
| 229 | 2-Hydroxy-2-(4-methyl-2-oxocyclohexyl)propyl hexopyranoside        | C <sub>16</sub> H <sub>28</sub> O <sub>8</sub>  | ChemSpider ID<br>30791612 | 348.18                | -0.00006              |
| 230 | 2-Acetyl-1,3,4-tri-O-acetyl-2-deoxypentopyranose                   | C <sub>13</sub> H <sub>18</sub> O <sub>8</sub>  | ChemSpider ID<br>470300   | 302.10                | -0.00024              |
| 231 | 2,3-Di-O-benzyl-5-O-(4-nitrobenzoyl)pentofuranose                  | C <sub>26</sub> H <sub>25</sub> NO <sub>8</sub> | ChemSpider ID<br>488596   | 479.16                | -0.00026              |
| 232 | 2(R)-Hydroxy-2-methylbutyronitrile-beta-D-glucopyranoside          | C <sub>11</sub> H <sub>19</sub> NO <sub>6</sub> | 534-67-8                  | 261.12                | -0.00007              |
| 233 | 1,6-Di-O-galloyl-beta-D-glucopyranose                              | C <sub>20</sub> H <sub>20</sub> O <sub>14</sub> | 23363-08-8                | 484.08                | -0.00128              |
| 234 | 1,3,4,6-Tetra-O-acetyl-alpha-D-glucopyranose                       | C <sub>14</sub> H <sub>20</sub> O <sub>10</sub> | 13036-15-2                | 348.11                | -0.00042              |

| NO  | Name                                                   | Formula                                                       | CAS                       | Molecular Weight (Da) | Annot.Delta Mass (Da) |
|-----|--------------------------------------------------------|---------------------------------------------------------------|---------------------------|-----------------------|-----------------------|
| 235 | 2-Deoxy-beta-D-arabino-hexopyranose tetraacetate       | C <sub>14</sub> H <sub>20</sub> O <sub>9</sub>                | 16750-06-4                | 332.11                | -0.00012              |
| 236 | 1,2-Di-O-acetyl-3,5-di-O-benzoylpenntofuranose         | C <sup>23</sup> H <sup>22</sup> O <sup>9</sup>                | ChemSpider ID<br>494887   | 442.13                | -0.00048              |
| 237 | geniposide                                             | C <sub>17</sub> H <sub>24</sub> O <sub>10</sub>               | 24512-63-8                | 388.14                | -0.00039              |
| 238 | Triptidolide                                           | C <sub>20</sub> H <sub>24</sub> O <sub>7</sub>                | 38647-10-8                | 376.15                | -0.00030              |
| 239 | Picrotin                                               | C <sub>15</sub> H <sub>18</sub> O <sub>7</sub>                | 21416-53-5                | 310.11                | 0.00016               |
| 240 | 20(S)-Ginsenoside                                      | C <sub>36</sub> H <sub>62</sub> O <sub>8</sub>                | 78214-33-2                | 622.44                | -0.00131              |
| 241 | Lamiide                                                | C <sub>17</sub> H <sub>26</sub> O <sub>12</sub>               | 27856-54-8                | 422.14                | -0.00016              |
| 242 | Gibberellin A7                                         | C <sub>19</sub> H <sub>22</sub> O <sub>5</sub>                | 510-75-8                  | 330.15                | -0.00031              |
| 243 | Gibberellin A53                                        | C <sub>20</sub> H <sub>28</sub> O <sub>5</sub>                | 51576-08-0                | 348.19                | 0.00000               |
| 244 | Deoxyloganic acid                                      | C <sub>16</sub> H <sub>24</sub> O <sub>9</sub>                | 22487-36-1                | 360.14                | -0.00048              |
| 245 | Brusatol                                               | C <sub>26</sub> H <sub>32</sub> O <sub>11</sub>               | 14907-98-3                | 520.19                | -0.00083              |
| 246 | Artemotil                                              | C <sub>17</sub> H <sub>28</sub> O <sub>5</sub>                | 75887-54-6                | 312.19                | -0.00009              |
| 247 | Allamandin                                             | C <sub>15</sub> H <sub>16</sub> O <sub>7</sub>                | 51820-82-7                | 308.09                | 0.00025               |
| 248 | (+)-Gibberellic acid                                   | C <sub>19</sub> H <sub>22</sub> O <sub>6</sub>                | 77-06-5                   | 346.14                | 0.00016               |
| 249 | Sebacic acid                                           | C <sub>10</sub> H <sub>18</sub> O <sub>4</sub>                | 111-20-6                  | 202.12                | -0.00002              |
| 250 | Vanillyl mandelic acid                                 | C <sub>9</sub> H <sub>10</sub> O <sub>5</sub>                 | 55-10-7                   | 198.05                | -0.00022              |
| 251 | Porphobilinogen                                        | C <sub>10</sub> H <sub>14</sub> N <sub>2</sub> O <sub>4</sub> | 487-90-1                  | 226.10                | 0.00010               |
| 252 | Piscidic acid                                          | C <sub>11</sub> H <sub>12</sub> O <sub>7</sub>                | 35388-57-9                | 256.06                | 0.00002               |
| 253 | Phthalic acid                                          | C <sub>8</sub> H <sub>6</sub> O <sub>4</sub>                  | 88-99-3                   | 166.03                | -0.00033              |
| 254 | Butyl levulinate                                       | C <sub>9</sub> H <sub>16</sub> O <sub>3</sub>                 | 2052-15-5                 | 172.11                | 0.00017               |
| 255 | N-Succinyl-L-diaminopimelic acid                       | C <sub>11</sub> H <sub>18</sub> N <sub>2</sub> O <sub>7</sub> | 26605-36-7                | 290.11                | 0.00008               |
| 256 | 2-Naphthalen-2-yloxypropanoic acid                     | C <sub>13</sub> H <sub>12</sub> O <sub>3</sub>                | 10470-82-3                | 216.08                | 0.00009               |
| 257 | N,N-Diacetyllegionaminic acid                          | C <sub>13</sub> H <sub>22</sub> N <sub>2</sub> O <sub>8</sub> | ChemSpider ID<br>10179688 | 334.14                | 0.00012               |
| 258 | p-Tolyl beta-D-glucuronide                             | C <sub>13</sub> H <sub>16</sub> O <sub>7</sub>                | 17680-99-8                | 284.09                | 0.00074               |
| 259 | Dibenzoyl-D-tartaric acid                              | C <sub>18</sub> H <sub>14</sub> O <sub>8</sub>                | 17026-42-5                | 358.07                | -0.00010              |
| 260 | 3,6,9-Trioxaundecanedioic acid                         | C <sub>8</sub> H <sub>14</sub> O <sub>7</sub>                 | 13887-98-4                | 222.07                | 0.00016               |
| 261 | Luteic acid                                            | C <sub>14</sub> H <sub>8</sub> O <sub>9</sub>                 | 476-67-5                  | 320.02                | -0.00013              |
| 262 | Benzyl formate                                         | C <sub>8</sub> H <sub>8</sub> O <sub>2</sub>                  | 104-57-4                  | 136.05                | 0.00006               |
| 263 | 4-[2-(4-Amino-4-carboxybutanoyl)hydrazino]benzoic acid | C <sub>12</sub> H <sub>15</sub> N <sub>3</sub> O <sub>5</sub> | 69644-85-5                | 281.10                | 0.00068               |
| 264 | 4-Hydroxyquinoline-2-carboxylic acid                   | C <sub>10</sub> H <sub>7</sub> NO <sub>3</sub>                | 492-27-3                  | 189.04                | -0.00030              |
| 265 | 2-Isopropylmalic acid                                  | C <sub>7</sub> H <sub>12</sub> O <sub>5</sub>                 | 3237-44-3                 | 176.07                | -0.00003              |
| 266 | Hopantenic acid                                        | C <sub>10</sub> H <sub>19</sub> NO <sub>5</sub>               | 18679-90-8                | 233.13                | -0.00001              |
| 267 | Homovanillic acid                                      | C <sub>9</sub> H <sub>10</sub> O <sub>4</sub>                 | 306-08-1                  | 182.06                | 0.00029               |
| 268 | Dimethyl succinylsuccinate                             | C <sub>10</sub> H <sub>12</sub> O <sub>6</sub>                | 6289-46-9                 | 228.06                | 0.00005               |
| 269 | Glutaric anhydride                                     | C <sub>5</sub> H <sub>6</sub> O <sub>3</sub>                  | 108-55-4                  | 114.03                | 0.00006               |
| 270 | Glutaric acid                                          | C <sub>5</sub> H <sub>8</sub> O <sub>4</sub>                  | 110-94-1                  | 132.04                | -0.00009              |

| NO  | Name                                                            | Formula                                                       | CAS                       | Molecular Weight (Da) | Annot.Delta Mass (Da) |
|-----|-----------------------------------------------------------------|---------------------------------------------------------------|---------------------------|-----------------------|-----------------------|
| 271 | Fukiic acid                                                     | C <sub>11</sub> H <sub>12</sub> O <sub>8</sub>                | 35388-56-8                | 272.05                | -0.00039              |
| 272 | D-Xylonic acid                                                  | C <sub>5</sub> H <sub>10</sub> O <sub>6</sub>                 | 4172-43-4                 | 166.05                | 0.00029               |
| 273 | D-Pantothenic acid                                              | C <sub>9</sub> H <sub>17</sub> NO <sub>5</sub>                | 79-83-4                   | 219.11                | -0.00031              |
| 274 | DL-Mevalonic acid                                               | C <sub>6</sub> H <sub>12</sub> O <sub>4</sub>                 | 150-97-0                  | 148.07                | -0.00004              |
| 275 | Di-(2-ethylhexyl)phosphoric acid                                | C <sub>16</sub> H <sub>35</sub> O <sub>4</sub> P              | 298-07-7                  | 322.23                | 0.00003               |
| 276 | D-Gluconic acid                                                 | C <sub>6</sub> H <sub>12</sub> O <sub>7</sub>                 | 526-95-4                  | 196.06                | -0.00029              |
| 277 | Cinnamic acid                                                   | C <sub>9</sub> H <sub>8</sub> O <sub>2</sub>                  | 140-10-3                  | 148.05                | 0.00001               |
| 278 | Chorismic acid                                                  | C <sub>10</sub> H <sub>10</sub> O <sub>6</sub>                | 617-12-9                  | 226.05                | 0.00017               |
| 279 | Brassylic acid                                                  | C <sub>13</sub> H <sub>24</sub> O <sub>4</sub>                | 505-52-2                  | 244.17                | -0.00021              |
| 280 | Benzoic acid                                                    | C <sub>7</sub> H <sub>6</sub> O <sub>2</sub>                  | 65-85-0                   | 122.04                | 0.00023               |
| 281 | Azelaic acid                                                    | C <sub>9</sub> H <sub>16</sub> O <sub>4</sub>                 | 123-99-9                  | 188.10                | -0.00004              |
| 282 | Acetylsalicylic acid                                            | C <sub>9</sub> H <sub>8</sub> O <sub>4</sub>                  | 50-78-2                   | 180.04                | 0.00013               |
| 283 | 5-Methoxy-3-indoleacetate                                       | C <sub>11</sub> H <sub>11</sub> NO <sub>3</sub>               | 3471-31-6                 | 205.07                | -0.00035              |
| 284 | 5-[(3-Methoxyphenoxy)methyl]-2-furoic acid                      | C <sub>13</sub> H <sub>12</sub> O <sub>5</sub>                | 405897-57-6               | 248.07                | -0.00043              |
| 285 | 5,5'-Dehydrodivanillate                                         | C <sub>16</sub> H <sub>14</sub> O <sub>8</sub>                | 2134-90-9                 | 334.07                | -0.00027              |
| 286 | 5-(3,4-Dimethoxyphenyl)-2-methyl-3-furoic acid                  | C <sub>14</sub> H <sub>14</sub> O <sub>5</sub>                | 696627-31-3               | 262.08                | -0.00022              |
| 287 | 4-oxo-1,2-Cyclopentanedicarboxylic acid                         | C <sub>7</sub> H <sub>8</sub> O <sub>5</sub>                  | 1703-61-3                 | 172.04                | 0.00025               |
| 288 | 4-Methylsulfonylbenzoic acid                                    | C <sub>8</sub> H <sub>8</sub> O <sub>4</sub> S                | 4052-30-6                 | 200.01                | -0.00013              |
| 289 | 4-Carboxy-3-hydroxyphenyl hexopyranosiduronic acid              | C <sub>13</sub> H <sub>14</sub> O <sub>10</sub>               | ChemSpider ID<br>74886630 | 330.06                | -0.00047              |
| 290 | 3-Butene-1,2,3-tricarboxylic acid                               | C <sub>7</sub> H <sub>8</sub> O <sub>6</sub>                  | 26326-05-6                | 188.03                | 0.00030               |
| 291 | 3,8,13,17-Tetramethyl-12-vinyl-2,7,18-Porphinetripropionic acid | C <sub>35</sub> H <sub>36</sub> N <sub>4</sub> O <sub>6</sub> | 30783-27-8                | 608.26                | -0.00031              |
| 292 | 3,4-Dimethoxyhydrocinnamic acid                                 | C <sub>11</sub> H <sub>14</sub> O <sub>4</sub>                | 2107-70-2                 | 210.09                | 0.00001               |
| 293 | 3,4,5-Trimethoxyphenylacetic acid                               | C <sub>11</sub> H <sub>14</sub> O <sub>5</sub>                | 951-82-6                  | 226.08                | -0.00002              |
| 294 | 3,4,5-Trimethoxyhydrocinnamic acid                              | C <sub>12</sub> H <sub>16</sub> O <sub>5</sub>                | 25173-72-2                | 240.10                | -0.00013              |
| 295 | 2-Methylcitric acid                                             | C <sub>7</sub> H <sub>10</sub> O <sub>7</sub>                 | 6061-96-7                 | 206.04                | -0.00007              |
| 296 | 2-Furoic acid                                                   | C <sub>5</sub> H <sub>4</sub> O <sub>3</sub>                  | 88-14-2                   | 112.02                | -0.00015              |
| 297 | 2-Amino-4-pyrimidinecarboxylate                                 | C <sub>5</sub> H <sub>4</sub> N <sub>3</sub> O <sub>2</sub>   | ChemSpider ID<br>24784670 | 138.03                | 0.00058               |
| 298 | 2,5-Dihydroxyterephthalic acid                                  | C <sub>8</sub> H <sub>6</sub> O <sub>6</sub>                  | 610-92-4                  | 198.02                | -0.00044              |
| 299 | 2,3,4,5-Tetramethoxybenzoic acid                                | C <sub>11</sub> H <sub>14</sub> O <sub>6</sub>                | 72023-44-0                | 242.08                | 0.00020               |
| 300 | 2,2-Bis(hydroxymethyl)propionic acid                            | C <sub>5</sub> H <sub>10</sub> O <sub>4</sub>                 | 4767-03-7                 | 134.06                | -0.00020              |
| 301 | 2-(Benzoyloxy)-3-hydroxysuccinic acid                           | C <sub>11</sub> H <sub>10</sub> O <sub>7</sub>                | 65621-34-3                | 254.04                | -0.00008              |
| 302 | 12-oxo Phytodienoic Acid                                        | C <sub>18</sub> H <sub>28</sub> O <sub>3</sub>                | 67204-66-4                | 292.20                | 0.00008               |
| 303 | 10-Undecenoic acid                                              | C <sub>11</sub> H <sub>20</sub> O <sub>2</sub>                | 112-38-9                  | 184.15                | -0.00005              |

| NO  | Name                                             | Formula                                                      | CAS          | Molecular Weight (Da) | Annot.Delta Mass (Da) |
|-----|--------------------------------------------------|--------------------------------------------------------------|--------------|-----------------------|-----------------------|
| 304 | 1,3,7-Trimethyluric acid                         | C <sub>8</sub> H <sub>10</sub> N <sub>4</sub> O <sub>3</sub> | 5415-44-1    | 210.08                | 0.00019               |
| 305 | 3-Dehydroquinic acid                             | C <sub>7</sub> H <sub>10</sub> O <sub>6</sub>                | 10534-44-8   | 190.05                | 0.00011               |
| 306 | (+)-Quinic acid                                  | C <sub>7</sub> H <sub>12</sub> O <sub>6</sub>                | 36413-60-2   | 192.06                | -0.00027              |
| 307 | trans-Ferulic Acid                               | C <sub>10</sub> H <sub>10</sub> O <sub>4</sub>               | 1135-24-6    | 194.06                | -0.00024              |
| 308 | 4-Methoxycinnamic acid                           | C <sub>10</sub> H <sub>10</sub> O <sub>3</sub>               | 830-09-1     | 178.06                | -0.00017              |
| 309 | 3,4-Dimethoxycinnamic acid                       | C <sub>11</sub> H <sub>12</sub> O <sub>4</sub>               | 2316-26-9    | 208.07                | -0.00017              |
| 310 | (2,2,6,6-Tetramethyl-4-piperidiny) acetic acid   | C <sub>11</sub> H <sub>21</sub> NO <sub>2</sub>              | 34635-77-3   | 199.16                | 0.00010               |
| 311 | (+)-Absciscic acid                               | C <sub>15</sub> H <sub>20</sub> O <sub>4</sub>               | 7773-56-0    | 264.14                | 0.00024               |
| 312 | Shikimic acid                                    | C <sub>7</sub> H <sub>10</sub> O <sub>5</sub>                | 138-59-0     | 174.05                | -0.00025              |
| 313 | pinellic acid                                    | C <sub>18</sub> H <sub>34</sub> O <sub>5</sub>               | 97134-11-7   | 330.24                | -0.00039              |
| 314 | Phaseolic acid                                   | C <sub>13</sub> H <sub>12</sub> O <sub>8</sub>               | 53755-04-7   | 296.05                | 0.00006               |
| 315 | Phaseic acid                                     | C <sub>15</sub> H <sub>20</sub> O <sub>5</sub>               | 24394-14-7   | 280.13                | -0.00011              |
| 316 | Dibutyl sebacate                                 | C <sub>18</sub> H <sub>34</sub> O <sub>4</sub>               | 109-43-3     | 314.25                | -0.00002              |
| 317 | 1-Acetoxy-2-hydroxy-16-heptadecy n-4-one         | C <sub>19</sub> H <sub>32</sub> O <sub>4</sub>               | 24607-10-1   | 324.23                | 0.00002               |
| 318 | Tuliposide B                                     | C <sub>11</sub> H <sub>18</sub> O <sub>9</sub>               | 19870-33-8   | 294.09                | -0.00013              |
| 319 | Suberic acid                                     | C <sub>8</sub> H <sub>14</sub> O <sub>4</sub>                | 505-48-6     | 174.09                | 0.00006               |
| 320 | Soyacerebroside I                                | C <sub>40</sub> H <sub>75</sub> NO <sub>9</sub>              | 114297-20-0  | 713.54                | -0.00325              |
| 321 | Ricinelaiddic acid                               | C <sub>18</sub> H <sub>34</sub> O <sub>3</sub>               | 141-22-0     | 298.25                | 0.00013               |
| 322 | Methyl 2-octynoate                               | C <sub>9</sub> H <sub>14</sub> O <sub>2</sub>                | 111-12-6     | 154.10                | 0.00001               |
| 323 | 10-Hydroxy-2-decenoic acid                       | C <sub>10</sub> H <sub>18</sub> O <sub>3</sub>               | 14113-05-4   | 186.13                | -0.00002              |
| 324 | Phloionolic acid                                 | C <sub>18</sub> H <sub>36</sub> O <sub>5</sub>               | 496-86-6     | 332.26                | -0.00014              |
| 325 | N-Oleoyl-L-Serine                                | C <sub>21</sub> H <sub>39</sub> NO <sub>4</sub>              | 1246302-99-7 | 369.29                | 0.00007               |
| 326 | 3-Hydroxydecanoic acid                           | C <sub>10</sub> H <sub>20</sub> O <sub>3</sub>               | 14292-26-3   | 188.14                | 0.00023               |
| 327 | 1-alpha-Linolenoylglycerol                       | C <sub>21</sub> H <sub>36</sub> O <sub>4</sub>               | 18465-99-1   | 352.26                | 0.00031               |
| 328 | 2-Hydroxydocosanoic acid                         | C <sub>22</sub> H <sub>44</sub> O <sub>3</sub>               | 13980-14-8   | 356.33                | 0.00062               |
| 329 | Linolenelaiddic acid                             | C <sub>18</sub> H <sub>30</sub> O <sub>2</sub>               | 28290-79-1   | 278.22                | 0.00000               |
| 330 | 16-Hydroxyhexadecanoic acid                      | C <sub>16</sub> H <sub>32</sub> O <sub>3</sub>               | 506-13-8     | 272.24                | 0.00008               |
| 331 | Ethyl 3-oxohexanoate                             | C <sub>8</sub> H <sub>14</sub> O <sub>3</sub>                | 3249-68-1    | 158.09                | -0.00024              |
| 332 | Dodecanedioic acid                               | C <sub>12</sub> H <sub>22</sub> O <sub>4</sub>               | 693-23-2     | 230.15                | -0.00009              |
| 333 | Diethyl diallylmalonate                          | C <sub>13</sub> H <sub>20</sub> O <sub>4</sub>               | 3195-24-2    | 240.14                | 0.00008               |
| 334 | 9-Hydroxynonanoic acid                           | C <sub>9</sub> H <sub>18</sub> O <sub>3</sub>                | 3788-56-5    | 174.13                | 0.00006               |
| 335 | 9,10-Dihydroxystearic acid                       | C <sub>18</sub> H <sub>36</sub> O <sub>4</sub>               | 120-87-6     | 316.26                | 0.00008               |
| 336 | 2-Hydroxytetraecosanoic acid                     | C <sub>24</sub> H <sub>48</sub> O <sub>3</sub>               | 544-57-0     | 384.36                | 0.00048               |
| 337 | 13-Hydroxyoctadecadienoic acid                   | C <sub>18</sub> H <sub>32</sub> O <sub>3</sub>               | 29623-28-7   | 296.24                | -0.00007              |
| 338 | 13-Hydroxy-9-methoxy-10-oxo-11-octadecenoic acid | C <sub>19</sub> H <sub>34</sub> O <sub>5</sub>               | 150147-08-3  | 342.24                | -0.00028              |
| 339 | 13(S)-Hydroperoxylinolenic acid                  | C <sub>18</sub> H <sub>30</sub> O <sub>4</sub>               | 67597-26-6   | 310.21                | -0.00013              |
| 340 | 12-Hydroxyjasmonic acid glucoside                | C <sub>18</sub> H <sub>28</sub> O <sub>9</sub>               | 120399-24-8  | 388.17                | -0.00016              |
| 341 | 12-Hydroxylauric acid                            | C <sub>12</sub> H <sub>24</sub> O <sub>3</sub>               | 505-95-3     | 216.17                | 0.00020               |
| 342 | 12-Hydroxyoctadecanoic acid                      | C <sub>18</sub> H <sub>36</sub> O <sub>3</sub>               | 106-14-9     | 300.27                | 0.00035               |

| NO  | Name                                                    | Formula                                           | CAS                       | Molecular Weight (Da) | Annot.Delta Mass (Da) |
|-----|---------------------------------------------------------|---------------------------------------------------|---------------------------|-----------------------|-----------------------|
| 343 | 12-Aminolauric Acid                                     | C <sub>12</sub> H <sub>25</sub> NO <sub>2</sub>   | 693-57-2                  | 215.19                | 0.00017               |
| 344 | (5Z,8Z)-Tetradecadienoylcarnitine                       | C <sub>21</sub> H <sub>37</sub> NO <sub>4</sub>   | 1469901-01-6              | 367.27                | 0.00006               |
| 345 | LPE(18:3)                                               | C <sub>23</sub> H <sub>42</sub> NO <sub>7</sub> P | ChemSpider ID<br>24769359 | 475.27                | 0.00011               |
| 346 | (10E,15Z)-9,12,13-Trihydroxy-10,15-octadecadienoic acid | C <sub>18</sub> H <sub>32</sub> O <sub>5</sub>    | 95341-44-9                | 328.22                | -0.00040              |
| 347 | Pentadecanedioic acid                                   | C <sub>15</sub> H <sub>28</sub> O <sub>4</sub>    | 1460-18-0                 | 272.20                | 0.00011               |
| 348 | N-Undecanoylglycine                                     | C <sub>13</sub> H <sub>25</sub> NO <sub>3</sub>   | 83871-09-4                | 243.18                | -0.00069              |
| 349 | N-Lauroylglycine                                        | C <sub>14</sub> H <sub>27</sub> NO <sub>3</sub>   | 7596-88-5                 | 257.20                | -0.00014              |

Note: Annot. Delta Mass represents the difference between the actual measured value of molecular weight and the theoretical value.

**Table S3.** List of 206 non-volatile metabolites in the processing of Rizhao green tea (ESI+, Hilic column).

| NO | Name                                           | Formula                                                            | CAS                     | Molecular Weight (Da) | Annot.Delta Mass (Da) |
|----|------------------------------------------------|--------------------------------------------------------------------|-------------------------|-----------------------|-----------------------|
| 1  | N <sup>2</sup> -Acetyl-N-methyllysineamide     | C <sub>9</sub> H <sub>19</sub> N <sub>3</sub> O <sub>2</sub>       | ChemSpider ID<br>485364 | 201.15                | -0.00033              |
| 2  | N <sup>2</sup> -(tert-Butoxycarbonyl)glutamine | C <sub>10</sub> H <sub>18</sub> N <sub>2</sub> O <sub>5</sub>      | 85535-45-1              | 246.12                | -0.00041              |
| 3  | N-Acetylvaline                                 | C <sub>7</sub> H <sub>13</sub> NO <sub>3</sub>                     | 3067-19-4               | 159.09                | -0.00013              |
| 4  | N-Acetyl-L-leucine                             | C <sub>8</sub> H <sub>15</sub> NO <sub>3</sub>                     | 1188-21-2               | 173.11                | -0.00012              |
| 5  | N-Acetyl-L-aspartic acid                       | C <sub>6</sub> H <sub>9</sub> NO <sub>5</sub>                      | 997-55-7                | 175.05                | -0.00020              |
| 6  | L-alpha-Aspartyl-D-phenylalanine methyl ester  | C <sub>14</sub> H <sub>18</sub> N <sub>2</sub> O <sub>5</sub>      | 22839-65-2              | 294.12                | -0.00029              |
| 7  | Leu-Pro                                        | C <sub>11</sub> H <sub>20</sub> N <sub>2</sub> O <sub>3</sub>      | 6403-35-6               | 228.15                | -0.00030              |
| 8  | L-Theanine                                     | C <sub>7</sub> H <sub>14</sub> N <sub>2</sub> O <sub>3</sub>       | 3081-61-6               | 174.10                | -0.00018              |
| 9  | L-Pyroglutamic acid                            | C <sub>5</sub> H <sub>7</sub> NO <sub>3</sub>                      | 98-79-3                 | 129.04                | -0.00006              |
| 10 | L-Proline                                      | C <sub>5</sub> H <sub>9</sub> NO <sub>2</sub>                      | 147-85-3                | 115.06                | -0.00020              |
| 11 | L-Valine                                       | C <sub>5</sub> H <sub>11</sub> NO <sub>2</sub>                     | 72-18-4                 | 117.08                | -0.00032              |
| 12 | L-Leucine                                      | C <sub>6</sub> H <sub>13</sub> NO <sub>2</sub>                     | 61-90-5                 | 131.09                | -0.00029              |
| 13 | Homocysteine                                   | C <sub>7</sub> H <sub>13</sub> NO <sub>2</sub>                     | 2756-85-6               | 143.09                | -0.00027              |
| 14 | Gly-Leu                                        | C <sub>8</sub> H <sub>16</sub> N <sub>2</sub> O <sub>3</sub>       | 869-19-2                | 188.12                | -0.00030              |
| 15 | Ethyl DL-methionate                            | C <sub>7</sub> H <sub>15</sub> NO <sub>2</sub> S                   | 452-95-9                | 177.08                | -0.00020              |
| 16 | Boc-Glycine                                    | C <sub>7</sub> H <sub>13</sub> NO <sub>4</sub>                     | 4530-20-5               | 175.08                | -0.00005              |
| 17 | Acetyl-L-proline                               | C <sub>7</sub> H <sub>11</sub> NO <sub>3</sub>                     | 68-95-1                 | 157.07                | -0.00018              |
| 18 | 5-Hydroxy-DL-tryptophan                        | C <sub>11</sub> H <sub>12</sub> N <sub>2</sub> O <sub>3</sub>      | 56-69-9                 | 220.08                | -0.00042              |
| 19 | 2-Morpholinoacetic acid                        | C <sub>6</sub> H <sub>11</sub> NO <sub>3</sub>                     | 3235-69-6               | 145.07                | -0.00027              |
| 20 | N-tert-Butoxycarbonyl-DL-proline               | C <sub>10</sub> H <sub>17</sub> NO <sub>4</sub>                    | 59433-50-0              | 215.12                | -0.00021              |
| 21 | N-Ethoxycarbonyl-L-proline                     | C <sub>8</sub> H <sub>13</sub> NO <sub>4</sub>                     | 5700-74-3               | 187.08                | 0.00018               |
| 22 | Hydroginkgolic acid                            | C <sub>22</sub> H <sub>36</sub> O <sub>3</sub>                     | 16611-84-0              | 348.27                | -0.00068              |
| 23 | Uracil                                         | C <sub>4</sub> H <sub>4</sub> N <sub>2</sub> O <sub>2</sub>        | 66-22-8                 | 112.03                | -0.00023              |
| 24 | trans-Zeatin                                   | C <sub>10</sub> H <sub>13</sub> N <sub>5</sub> O                   | 1637-39-4               | 219.11                | -0.00025              |
| 25 | 4-Amino-5-hydroxymethyl-2-methylpyrimidine     | C <sub>6</sub> H <sub>9</sub> N <sub>3</sub> O                     | 73-67-6                 | 139.07                | -0.00018              |
| 26 | Thymine                                        | C <sub>5</sub> H <sub>6</sub> N <sub>2</sub> O <sub>2</sub>        | 65-71-4                 | 126.04                | -0.00019              |
| 27 | Xanthine                                       | C <sub>5</sub> H <sub>4</sub> N <sub>4</sub> O <sub>2</sub>        | 69-89-6                 | 152.03                | -0.00010              |
| 28 | Purine                                         | C <sub>5</sub> H <sub>4</sub> N <sub>4</sub>                       | 120-73-0                | 120.04                | -0.00018              |
| 29 | N6-Methyladenosine                             | C <sub>11</sub> H <sub>15</sub> N <sub>5</sub> O <sub>4</sub>      | 1867-73-8               | 281.11                | -0.00061              |
| 30 | N,N-Dimethyladenine                            | C <sub>7</sub> H <sub>9</sub> N <sub>5</sub>                       | 938-55-6                | 163.09                | -0.00014              |
| 31 | 1-Methylxanthine                               | C <sub>6</sub> H <sub>6</sub> N <sub>4</sub> O <sub>2</sub>        | 6136-37-4               | 166.05                | -0.00028              |
| 32 | Hypoxanthine                                   | C <sub>5</sub> H <sub>4</sub> N <sub>4</sub> O                     | 68-94-0                 | 136.04                | -0.00027              |
| 33 | Cytosine                                       | C <sub>4</sub> H <sub>5</sub> N <sub>3</sub> O                     | 71-30-7                 | 111.04                | -0.00021              |
| 34 | 5'-Deoxy-5'-methylthioadenosine                | C <sub>11</sub> H <sub>15</sub> N <sub>5</sub> O <sub>3</sub><br>S | 2457-80-9               | 297.09                | -0.00050              |
| 35 | Adenine                                        | C <sub>5</sub> H <sub>5</sub> N <sub>5</sub>                       | 73-24-5                 | 135.05                | -0.00031              |
| 36 | 9-(2-Hydroxypropyl)adenine                     | C <sub>8</sub> H <sub>11</sub> N <sub>5</sub> O                    | 14047-26-8              | 193.10                | -0.00021              |

| NO | Name                                | Formula                                                       | CAS        | Molecular Weight (Da) | Annot.Delta Mass (Da) |
|----|-------------------------------------|---------------------------------------------------------------|------------|-----------------------|-----------------------|
| 37 | 8-Hydroxyguanine                    | C <sub>5</sub> H <sub>5</sub> N <sub>5</sub> O <sub>2</sub>   | 5614-64-2  | 167.04                | -0.00016              |
| 38 | 6-O-Methylguanine                   | C <sub>6</sub> H <sub>7</sub> N <sub>5</sub> O                | 20535-83-5 | 165.06                | -0.00012              |
| 39 | 5-Methylcytosine                    | C <sub>5</sub> H <sub>7</sub> N <sub>3</sub> O                | 554-01-8   | 125.06                | -0.00016              |
| 40 | 3-Methyladenine                     | C <sub>6</sub> H <sub>7</sub> N <sub>5</sub>                  | 5142-23-4  | 149.07                | -0.00017              |
| 41 | N9-Hydroxyethyladenine              | C <sub>7</sub> H <sub>9</sub> N <sub>5</sub> O                | 707-99-3   | 179.08                | -0.00032              |
| 42 | 2'-Deoxyadenosine                   | C <sub>10</sub> H <sub>13</sub> N <sub>5</sub> O <sub>3</sub> | 958-09-8   | 251.10                | -0.00040              |
| 43 | 3,4,5,7,3',4',5'-Heptahydroxyflavan | C <sub>15</sub> H <sub>14</sub> O <sub>8</sub>                | 491-52-1   | 322.07                | -0.00048              |
| 44 | Quercitrin                          | C <sub>21</sub> H <sub>20</sub> O <sub>11</sub>               | 522-12-3   | 448.10                | -0.00081              |
| 45 | Kaempferol                          | C <sub>15</sub> H <sub>10</sub> O <sub>6</sub>                | 520-18-3   | 286.05                | -0.00063              |
| 46 | 3',4',5,7-Tetrahydroxyflavanone     | C <sub>15</sub> H <sub>12</sub> O <sub>6</sub>                | 4049-38-1  | 288.06                | -0.00063              |
| 47 | (+)-Catechin                        | C <sub>15</sub> H <sub>14</sub> O <sub>6</sub>                | 154-23-4   | 290.08                | -0.00062              |
| 48 | (+)-Procyanidin B2                  | C <sub>30</sub> H <sub>26</sub> O <sub>12</sub>               | 29106-49-8 | 578.14                | -0.00053              |
| 49 | N,N-Diethyl-4-nitroaniline          | C <sub>10</sub> H <sub>14</sub> N <sub>2</sub> O <sub>2</sub> | 2216-15-1  | 194.11                | -0.00009              |
| 50 | Vanillin                            | C <sub>8</sub> H <sub>8</sub> O <sub>3</sub>                  | 121-33-5   | 152.05                | -0.00016              |
| 51 | L-Valinol                           | C <sub>5</sub> H <sub>13</sub> NO                             | 2026-48-4  | 103.10                | -0.00029              |
| 52 | Methyl propiolate                   | C <sub>4</sub> H <sub>4</sub> O <sub>2</sub>                  | 922-67-8   | 84.02                 | -0.00019              |
| 53 | Trimethylamine N-oxide              | C <sub>3</sub> H <sub>9</sub> NO                              | 1184-78-7  | 75.07                 | -0.00008              |
| 54 | 2,2,6,6-Tetramethyl-4-piperidinone  | C <sub>9</sub> H <sub>17</sub> NO                             | 826-36-8   | 155.13                | -0.00013              |
| 55 | 1-Methylpiperazine                  | C <sub>5</sub> H <sub>12</sub> N <sub>2</sub>                 | 109-01-3   | 100.10                | -0.00012              |
| 56 | Ethyl piperazine-1-carboxylate      | C <sub>7</sub> H <sub>14</sub> N <sub>2</sub> O <sub>2</sub>  | 120-43-4   | 158.11                | -0.00012              |
| 57 | Thiodiglycol                        | C <sub>4</sub> H <sub>10</sub> O <sub>2</sub> S               | 111-48-8   | 122.04                | -0.00019              |
| 58 | Tetralin                            | C <sub>10</sub> H <sub>12</sub>                               | 119-64-2   | 132.09                | -0.00016              |
| 59 | Tetraethylene glycol dimethyl ether | C <sub>10</sub> H <sub>22</sub> O <sub>5</sub>                | 143-24-8   | 222.15                | -0.00026              |
| 60 | N-Boc-N-methyl-aminoethanol         | C <sub>8</sub> H <sub>17</sub> NO <sub>3</sub>                | 57561-39-4 | 175.12                | -0.00019              |
| 61 | 4-Methyl-5-thiazoleethanol          | C <sub>6</sub> H <sub>9</sub> NOS                             | 137-00-8   | 143.04                | -0.00014              |
| 62 | Succinimide                         | C <sub>4</sub> H <sub>5</sub> NO <sub>2</sub>                 | 123-56-8   | 99.03                 | -0.00015              |
| 63 | 4-Acetoxytyrene                     | C <sub>10</sub> H <sub>10</sub> O <sub>2</sub>                | 2628-16-2  | 162.07                | -0.00030              |
| 64 | Pentaethylene glycol                | C <sub>10</sub> H <sub>22</sub> O <sub>6</sub>                | 4792-15-8  | 238.14                | -0.00039              |
| 65 | Tetraethylene glycol                | C <sub>8</sub> H <sub>18</sub> O <sub>5</sub>                 | 112-60-7   | 194.12                | -0.00024              |
| 66 | p-Anisoin                           | C <sub>16</sub> H <sub>16</sub> O <sub>4</sub>                | 119-52-8   | 272.10                | -0.00059              |
| 67 | Octylamine                          | C <sub>8</sub> H <sub>19</sub> N                              | 111-86-4   | 129.15                | -0.00012              |
| 68 | Octinoxate                          | C <sub>18</sub> H <sub>26</sub> O <sub>3</sub>                | 5466-77-3  | 290.19                | -0.00076              |
| 69 | 3-Acetyldindole                     | C <sub>10</sub> H <sub>9</sub> NO                             | 703-80-0   | 159.07                | -0.00016              |
| 70 | N-Nitropyrrolidine                  | C <sub>4</sub> H <sub>8</sub> N <sub>2</sub> O                | 930-55-2   | 100.06                | -0.00019              |
| 71 | N-Isopropylacrylamide               | C <sub>6</sub> H <sub>11</sub> NO                             | 2210-25-5  | 113.08                | -0.00029              |
| 72 | Decylamine                          | C <sub>10</sub> H <sub>23</sub> N                             | 2016-57-1  | 157.18                | -0.00005              |
| 73 | N-Methylhomoveratrylamine           | C <sub>11</sub> H <sub>17</sub> NO <sub>2</sub>               | 3490-06-0  | 195.13                | -0.00012              |
| 74 | N,N-Dimethylacetamide               | C <sub>4</sub> H <sub>9</sub> NO                              | 127-19-5   | 87.07                 | -0.00011              |
| 75 | N,N-Dibutylethanolamine             | C <sub>10</sub> H <sub>23</sub> NO                            | 102-81-8   | 173.18                | -0.00017              |
| 76 | N-Lauryldiethanolamine              | C <sub>16</sub> H <sub>35</sub> NO <sub>2</sub>               | 1541-67-9  | 273.27                | -0.00061              |
| 77 | Methyl ricinoleate                  | C <sub>19</sub> H <sub>36</sub> O <sub>3</sub>                | 141-24-2   | 312.27                | -0.00063              |
| 78 | Methyl                              | C <sub>21</sub> H <sub>43</sub> NO <sub>2</sub>               | 56817-90-4 | 341.33                | -0.00062              |

| NO  | Name                                       | Formula                                                      | CAS        | Molecular Weight (Da) | Annot.Delta Mass (Da) |
|-----|--------------------------------------------|--------------------------------------------------------------|------------|-----------------------|-----------------------|
|     | 6-(dimethylamino)octadecanoate             |                                                              |            |                       |                       |
| 79  | Piperidine-2,6-dione                       | C <sub>5</sub> H <sub>7</sub> NO <sub>2</sub>                | 1121-89-7  | 113.05                | -0.00010              |
| 80  | Laurylamine                                | C <sub>12</sub> H <sub>27</sub> N                            | 124-22-1   | 185.21                | -0.00018              |
| 81  | Laurophenone                               | C <sub>18</sub> H <sub>28</sub> O                            | 1674-38-0  | 260.21                | -0.00038              |
| 82  | Lauramide                                  | C <sub>12</sub> H <sub>25</sub> NO                           | 1120-16-7  | 199.19                | -0.00031              |
| 83  | 4-Piperidinecarboxamide                    | C <sub>6</sub> H <sub>12</sub> N <sub>2</sub> O              | 39546-32-2 | 128.09                | -0.00019              |
| 84  | Indole                                     | C <sub>8</sub> H <sub>7</sub> N                              | 120-72-9   | 117.06                | -0.00021              |
| 85  | Heptaethylene Glycol                       | C <sub>14</sub> H <sub>30</sub> O <sub>8</sub>               | 5617-32-3  | 326.19                | -0.00052              |
| 86  | 1-Methylcyclohexanol                       | C <sub>8</sub> H <sub>12</sub> O                             | 590-67-0   | 124.09                | -0.00019              |
| 87  | 2-Hydroxyquinoline                         | C <sub>9</sub> H <sub>7</sub> NO                             | 59-31-4    | 145.05                | -0.00015              |
|     | Ethyl                                      |                                                              |            |                       |                       |
| 88  | 4-hydroxy-2-methylpyrimidine-5-carboxylate | C <sub>8</sub> H <sub>10</sub> N <sub>2</sub> O <sub>3</sub> | 53135-24-3 | 182.07                | -0.00046              |
| 89  | Ethyl 2-oxocyclohexanecarboxylate          | C <sub>9</sub> H <sub>14</sub> O <sub>3</sub>                | 1655-07-8  | 170.09                | -0.00031              |
| 90  | Ethyl 2-(hydroxyimino)-3-oxobutanoate      | C <sub>6</sub> H <sub>9</sub> NO <sub>4</sub>                | 5408-04-8  | 159.05                | -0.00018              |
| 91  | 2,6-Ditert-butyl-4-(hydroxymethyl)phenol   | C <sub>15</sub> H <sub>24</sub> O <sub>2</sub>               | 88-26-6    | 236.18                | -0.00043              |
| 92  | N,N-Dimethylformamide                      | C <sub>3</sub> H <sub>7</sub> NO                             | 68-12-2    | 73.05                 | -0.00011              |
| 93  | Dimethyl N-acetyl-L-aspartate              | C <sub>8</sub> H <sub>13</sub> NO <sub>5</sub>               | 57289-64-2 | 203.08                | -0.00015              |
| 94  | Dimethyl 2-methylenesuccinate              | C <sub>7</sub> H <sub>10</sub> O <sub>4</sub>                | 617-52-7   | 158.06                | -0.00012              |
| 95  | Diisopropyl sulfite                        | C <sub>6</sub> H <sub>14</sub> O <sub>3</sub> S              | 4773-13-1  | 166.07                | -0.00009              |
|     | Diethyl                                    |                                                              |            |                       |                       |
| 96  | 4-oxo-4H-quinolizine-1,3-dicarboxylate     | C <sub>15</sub> H <sub>15</sub> NO <sub>5</sub>              | 54401-76-2 | 289.09                | -0.00068              |
| 97  | Dielaoidylphosphatidylcholine              | C <sub>44</sub> H <sub>84</sub> NO <sub>8</sub> P            | 52088-89-8 | 785.59                | -0.00342              |
| 98  | Choline O-Sulfate                          | C <sub>5</sub> H <sub>13</sub> NO <sub>4</sub> S             | 4858-96-2  | 183.06                | -0.00031              |
| 99  | Caprylic diethanolamide                    | C <sub>12</sub> H <sub>25</sub> NO <sub>3</sub>              | 3077-30-3  | 231.18                | -0.00038              |
| 100 | Butyl Sulfite                              | C <sub>8</sub> H <sub>18</sub> O <sub>3</sub> S              | 626-85-7   | 194.10                | -0.00056              |
| 101 | Butyl cyclohexyl phthalate                 | C <sub>18</sub> H <sub>24</sub> O <sub>4</sub>               | 84-64-0    | 304.17                | -0.00064              |
| 102 | Butoxytriglycol                            | C <sub>10</sub> H <sub>22</sub> O <sub>4</sub>               | 143-22-6   | 206.15                | -0.00018              |
| 103 | Ethyl benzoylacetate                       | C <sub>11</sub> H <sub>12</sub> O <sub>3</sub>               | 94-02-0    | 192.08                | -0.00021              |
| 104 | Acetophenone                               | C <sub>8</sub> H <sub>8</sub> O                              | 98-86-2    | 120.06                | -0.00023              |
| 105 | 4-Heptyloxyphenol                          | C <sub>13</sub> H <sub>20</sub> O <sub>2</sub>               | 13037-86-0 | 208.15                | -0.00030              |
| 106 | 6-Hydroxymethyl-7,8-dihydropterin          | C <sub>7</sub> H <sub>9</sub> N <sub>5</sub> O <sub>2</sub>  | 3672-03-5  | 195.08                | -0.00003              |
| 107 | 6,7-Dimethylpterin                         | C <sub>8</sub> H <sub>9</sub> N <sub>5</sub> O               | 611-55-2   | 191.08                | -0.00020              |
| 108 | 5-Hydroxyindole                            | C <sub>8</sub> H <sub>7</sub> NO                             | 1953-54-4  | 133.05                | -0.00004              |
| 109 | 5-(4-Methoxyphenyl)-1,3-cyclohexanedione   | C <sub>13</sub> H <sub>14</sub> O <sub>3</sub>               | 1774-12-5  | 218.09                | -0.00054              |
| 110 | 4-Vinylpyridine                            | C <sub>7</sub> H <sub>7</sub> N                              | 100-43-6   | 105.06                | -0.00016              |
| 111 | 4-Nitroaniline                             | C <sub>6</sub> H <sub>6</sub> N <sub>2</sub> O <sub>2</sub>  | 100-01-6   | 138.04                | -0.00017              |
| 112 | p-Anisidine                                | C <sub>7</sub> H <sub>9</sub> NO                             | 104-94-9   | 123.07                | 0.00008               |

| NO  | Name                                                | Formula                                                       | CAS                       | Molecular Weight (Da) | Annot.Delta Mass (Da) |
|-----|-----------------------------------------------------|---------------------------------------------------------------|---------------------------|-----------------------|-----------------------|
| 113 | 4-Aminophenol                                       | C <sub>6</sub> H <sub>7</sub> NO                              | 123-30-8                  | 109.05                | -0.00014              |
| 114 | 4,6-Di-tert-butylpyrogallol                         | C <sub>14</sub> H <sub>22</sub> O <sub>3</sub>                | 3934-77-8                 | 238.16                | -0.00043              |
| 115 | 3-Methyl-5-pyrazolone                               | C <sub>4</sub> H <sub>6</sub> N <sub>2</sub> O                | 108-26-9                  | 98.05                 | -0.00013              |
| 116 | 5-Methyl-3,4-dihydropyrazole-2-carboxamide          | C <sub>5</sub> H <sub>9</sub> N <sub>3</sub> O                | 17014-30-1                | 127.07                | -0.00023              |
| 117 | 3-Ethyl-o-xylene                                    | C <sub>10</sub> H <sub>14</sub>                               | 933-98-2                  | 134.11                | -0.00022              |
| 118 | 2-tert-Butyl-4-methoxyphenol                        | C <sub>11</sub> H <sub>16</sub> O <sub>2</sub>                | 121-00-6                  | 180.11                | -0.00025              |
| 119 | 3-Amino-benzamide                                   | C <sub>7</sub> H <sub>8</sub> N <sub>2</sub> O                | 3544-24-9                 | 136.06                | -0.00011              |
| 120 | 3-Hydroxyundecanoyl carnitine                       | C <sub>18</sub> H <sub>35</sub> NO <sub>5</sub>               | ChemSpider ID<br>59664326 | 345.25                | -0.00071              |
| 121 | 3,5-Ditert-butyl-4-hydroxybenzonitrile              | C <sub>15</sub> H <sub>21</sub> NO                            | 1988-88-1                 | 231.16                | -0.00048              |
| 122 | 3,5-Ditert-butyl-4-hydroxybenzaldehyde              | C <sub>15</sub> H <sub>22</sub> O <sub>2</sub>                | 1620-98-0                 | 234.16                | -0.00053              |
| 123 | 3,5-Dimethoxybenzohydrazide                         | C <sub>9</sub> H <sub>12</sub> N <sub>2</sub> O <sub>3</sub>  | 51707-38-1                | 196.08                | -0.00060              |
| 124 | 3,5-Ditert-butyl-4-hydroxyacetophenone              | C <sub>16</sub> H <sub>24</sub> O <sub>2</sub>                | 14035-33-7                | 248.18                | -0.00038              |
| 125 | 2-Pyrrolidone                                       | C <sub>4</sub> H <sub>7</sub> NO                              | 616-45-5                  | 85.05                 | -0.00014              |
| 126 | 2-Morpholinoacetonitrile                            | C <sub>6</sub> H <sub>10</sub> N <sub>2</sub> O               | 5807-02-3                 | 126.08                | -0.00019              |
| 127 | 2-Methoxy-5-nitrophenol                             | C <sub>7</sub> H <sub>7</sub> NO <sub>4</sub>                 | 636-93-1                  | 169.04                | -0.00023              |
| 128 | 2-Amino-1-(piperidin-1-yl)propan-1-one              | C <sub>8</sub> H <sub>16</sub> N <sub>2</sub> O               | 805974-19-0               | 156.13                | -0.00013              |
| 129 | 2-Amino-1,3,4-octadecanetriol                       | C <sub>18</sub> H <sub>39</sub> NO <sub>3</sub>               | 13552-11-9                | 317.29                | -0.00052              |
| 130 | N-Methylmoranoline                                  | C <sub>7</sub> H <sub>15</sub> NO <sub>4</sub>                | 69567-10-8                | 177.10                | -0.00010              |
| 131 | 2,4,6-Triaminotoluene                               | C <sub>7</sub> H <sub>11</sub> N <sub>3</sub>                 | 88-02-8                   | 137.10                | -0.00013              |
| 132 | 1-Vinyl-2-pyrrolidone                               | C <sub>6</sub> H <sub>9</sub> NO                              | 88-12-0                   | 111.07                | -0.00023              |
| 133 | 1-Methyl-4-nitrosopiperazine                        | C <sub>5</sub> H <sub>11</sub> N <sub>3</sub> O               | 16339-07-4                | 129.09                | -0.00017              |
| 134 | 4-Amino-1-carbethoxypiperidine                      | C <sub>8</sub> H <sub>16</sub> N <sub>2</sub> O <sub>2</sub>  | 58859-46-4                | 172.12                | -0.00019              |
| 135 | 1-Boc-piperazine                                    | C <sub>9</sub> H <sub>18</sub> N <sub>2</sub> O <sub>2</sub>  | 57260-71-6                | 186.14                | -0.00030              |
| 136 | 1-Boc-3-piperidinol                                 | C <sub>10</sub> H <sub>19</sub> NO <sub>3</sub>               | 85275-45-2                | 201.14                | -0.00026              |
| 137 | 1,8,15,22-Tetraazacyclooctacosane-2,9,16,23-tetrone | C <sub>24</sub> H <sub>44</sub> N <sub>4</sub> O <sub>4</sub> | 5834-63-9                 | 452.34                | -0.00103              |
| 138 | 1,6-Hexanediol diacrylate                           | C <sub>12</sub> H <sub>18</sub> O <sub>4</sub>                | 13048-33-4                | 226.12                | -0.00048              |
| 139 | 1,3,5-Norcaratriene                                 | C <sub>7</sub> H <sub>6</sub>                                 | 4646-69-9                 | 90.05                 | -0.00017              |
| 140 | 1,1-Bis(morpholino)ethylene                         | C <sub>10</sub> H <sub>18</sub> N <sub>2</sub> O <sub>2</sub> | 14212-87-4                | 198.14                | -0.00020              |
| 141 | Diisopropyl diazene-1,2-dicarboxylate               | C <sub>8</sub> H <sub>14</sub> N <sub>2</sub> O <sub>4</sub>  | 2446-83-5                 | 202.10                | -0.00015              |
| 142 | Yomogiartemin                                       | C <sub>17</sub> H <sub>20</sub> O <sub>7</sub>                | 69684-72-6                | 336.12                | -0.00059              |
| 143 | Pyridoxal                                           | C <sub>8</sub> H <sub>9</sub> NO <sub>3</sub>                 | 66-72-8                   | 167.06                | -0.00021              |
| 144 | (+)-Riboflavin                                      | C <sub>17</sub> H <sub>20</sub> N <sub>4</sub> O <sub>6</sub> | 83-88-5                   | 376.14                | -0.00072              |
| 145 | Niacin                                              | C <sub>6</sub> H <sub>5</sub> NO <sub>2</sub>                 | 59-67-6                   | 123.03                | -0.00008              |
| 146 | Nicotinamide                                        | C <sub>6</sub> H <sub>6</sub> N <sub>2</sub> O                | 98-92-0                   | 122.05                | -0.00024              |

| NO  | Name                                               | Formula                                                       | CAS                  | Molecular Weight (Da) | Annot.Delta Mass (Da) |
|-----|----------------------------------------------------|---------------------------------------------------------------|----------------------|-----------------------|-----------------------|
| 147 | Dopamine                                           | C <sub>8</sub> H <sub>11</sub> NO <sub>2</sub>                | 51-61-6              | 153.08                | -0.00019              |
| 148 | Theophylline                                       | C <sub>7</sub> H <sub>8</sub> N <sub>4</sub> O <sub>2</sub>   | 58-55-9              | 180.06                | -0.00034              |
| 149 | Terminaline                                        | C <sub>23</sub> H <sub>41</sub> NO <sub>2</sub>               | 15112-49-9           | 363.31                | -0.00080              |
| 150 | 4-Butyrobetaine                                    | C <sub>7</sub> H <sub>15</sub> NO <sub>2</sub>                | ChemSpider ID<br>705 | 145.11                | -0.00025              |
| 151 | Oxyphylline                                        | C <sub>9</sub> H <sub>12</sub> N <sub>4</sub> O <sub>3</sub>  | 519-37-9             | 224.09                | -0.00027              |
| 152 | Caffeine                                           | C <sub>8</sub> H <sub>10</sub> N <sub>4</sub> O <sub>2</sub>  | 58-08-2              | 194.08                | -0.00034              |
| 153 | Arecoline                                          | C <sub>8</sub> H <sub>13</sub> NO <sub>2</sub>                | 63-75-2              | 155.09                | -0.00015              |
| 154 | Sorbic acid                                        | C <sub>6</sub> H <sub>8</sub> O <sub>2</sub>                  | 110-44-1             | 112.05                | -0.00018              |
| 155 | Quinolinic acid                                    | C <sub>7</sub> H <sub>5</sub> NO <sub>4</sub>                 | 89-00-9              | 167.02                | -0.00014              |
| 156 | Pheophorbide A                                     | C <sub>35</sub> H <sub>36</sub> N <sub>4</sub> O <sub>5</sub> | 15664-29-6           | 592.27                | -0.00134              |
| 157 | 4-Hexyloxybenzoic acid                             | C <sub>13</sub> H <sub>18</sub> O <sub>3</sub>                | 1142-39-8            | 222.13                | -0.00040              |
| 158 | Oxamide                                            | C <sub>2</sub> H <sub>4</sub> N <sub>2</sub> O <sub>2</sub>   | 471-46-5             | 88.03                 | -0.00011              |
| 159 | Indole-3-acetic acid                               | C <sub>10</sub> H <sub>9</sub> NO <sub>2</sub>                | 87-51-4              | 175.06                | -0.00019              |
| 160 | gamma-Aminobutyric acid                            | C <sub>4</sub> H <sub>9</sub> NO <sub>2</sub>                 | 56-12-2              | 103.06                | -0.00015              |
| 161 | Boc-GABA                                           | C <sub>9</sub> H <sub>17</sub> NO <sub>4</sub>                | 57294-38-9           | 203.12                | -0.00023              |
| 162 | Guvacine                                           | C <sub>6</sub> H <sub>9</sub> NO <sub>2</sub>                 | 498-96-4             | 127.06                | -0.00025              |
| 163 | Gibberellin A7                                     | C <sub>19</sub> H <sub>22</sub> O <sub>5</sub>                | 510-75-8             | 330.15                | -0.00068              |
| 164 | Alantolactone                                      | C <sub>15</sub> H <sub>20</sub> O <sub>2</sub>                | 546-43-0             | 232.15                | -0.00054              |
| 165 | Coumarin                                           | C <sub>9</sub> H <sub>6</sub> O <sub>2</sub>                  | 91-64-5              | 146.04                | -0.00016              |
| 166 | Butyl levulinate                                   | C <sub>9</sub> H <sub>16</sub> O <sub>3</sub>                 | 2052-15-5            | 172.11                | -0.00023              |
| 167 | Benzyl formate                                     | C <sub>8</sub> H <sub>8</sub> O <sub>2</sub>                  | 104-57-4             | 136.05                | -0.00017              |
| 168 | D-Pantothenic acid                                 | C <sub>9</sub> H <sub>17</sub> NO <sub>5</sub>                | 79-83-4              | 219.11                | -0.00024              |
| 169 | Chrysanthemic acid                                 | C <sub>10</sub> H <sub>16</sub> O <sub>2</sub>                | 10453-89-1           | 168.11                | -0.00027              |
| 170 | Aminolevulinic acid                                | C <sub>5</sub> H <sub>9</sub> NO <sub>3</sub>                 | 106-60-5             | 131.06                | -0.00008              |
| 171 | 1-Aminocyclopropanecarboxylic acid                 | C <sub>4</sub> H <sub>7</sub> NO <sub>2</sub>                 | 22059-21-8           | 101.05                | -0.00017              |
| 172 | 4-Aminobenzoic acid                                | C <sub>7</sub> H <sub>7</sub> NO <sub>2</sub>                 | 150-13-0             | 137.05                | -0.00012              |
| 173 | 3-Methylglutaryl carnitine                         | C <sub>13</sub> H <sub>23</sub> NO <sub>6</sub>               | 102673-95-0          | 289.15                | 0.00079               |
| 174 | Dibutyl sebacate                                   | C <sub>18</sub> H <sub>34</sub> O <sub>4</sub>                | 109-43-3             | 314.25                | -0.00036              |
| 175 | 1-Acetoxy-2-hydroxy-16-heptadecy n-4-one           | C <sub>19</sub> H <sub>32</sub> O <sub>4</sub>                | 24607-10-1           | 324.23                | -0.00063              |
| 176 | (E)-12-Oxo-10-dodecanoic acid                      | C <sub>12</sub> H <sub>20</sub> O <sub>3</sub>                | 65410-38-0           | 212.14                | -0.00037              |
| 177 | Tetrahydrodeoxycorticosterone                      | C <sub>21</sub> H <sub>34</sub> O <sub>3</sub>                | 567-02-2             | 334.25                | -0.00071              |
| 178 | Soyacerebroside I                                  | C <sub>40</sub> H <sub>75</sub> NO <sub>9</sub>               | 114297-20-0          | 713.54                | -0.00154              |
| 179 | Ricinelaic acid                                    | C <sub>18</sub> H <sub>34</sub> O <sub>3</sub>                | 540-12-5             | 298.25                | -0.00050              |
| 180 | Methyl 2-octynoate                                 | C <sub>9</sub> H <sub>14</sub> O <sub>2</sub>                 | 111-12-6             | 154.10                | -0.00042              |
| 181 | 1-alpha-Linolenoyl-2-linoleoyl-phosphatidylcholine | C <sub>44</sub> H <sub>78</sub> NO <sub>8</sub> P             | 8002-43-5            | 779.54                | -0.00153              |
| 182 | L-alpha-1-Palmitoyl-2-linoleoylphosphatidylcholine | C <sub>42</sub> H <sub>80</sub> NO <sub>8</sub> P             | 17708-90-6           | 757.56                | -0.00076              |
| 183 | Palmitoyl alanine                                  | C <sub>19</sub> H <sub>37</sub> NO <sub>3</sub>               | 56255-31-3           | 327.28                | -0.00093              |

| NO  | Name                                                        | Formula                                                      | CAS                       | Molecular Weight (Da) | Annot.Delta Mass (Da) |
|-----|-------------------------------------------------------------|--------------------------------------------------------------|---------------------------|-----------------------|-----------------------|
| 184 | 1-alpha-Linolenoylglycerol                                  | C <sub>21</sub> H <sub>36</sub> O <sub>4</sub>               | 18465-99-1                | 352.26                | -0.00072              |
| 185 | Linolenelaidic acid                                         | C <sub>18</sub> H <sub>30</sub> O <sub>2</sub>               | 28290-79-1                | 278.22                | -0.00048              |
| 186 | L-alpha-Palmitin                                            | C <sub>19</sub> H <sub>38</sub> O <sub>4</sub>               | 32899-41-5                | 330.28                | -0.00083              |
| 187 | Embelin                                                     | C <sub>17</sub> H <sub>26</sub> O <sub>4</sub>               | 550-24-3                  | 294.18                | -0.00043              |
| 188 | 10-Nitrooleic acid                                          | C <sub>18</sub> H <sub>33</sub> NO <sub>4</sub>              | 88127-53-1                | 327.24                | -0.00074              |
| 189 | Biacetyl                                                    | C <sub>4</sub> H <sub>6</sub> O <sub>2</sub>                 | 431-03-8                  | 86.04                 | -0.00010              |
| 190 | Adipamide                                                   | C <sub>6</sub> H <sub>12</sub> N <sub>2</sub> O <sub>2</sub> | 628-94-4                  | 144.09                | -0.00013              |
| 191 | A-12(13)-EpODE                                              | C <sub>18</sub> H <sub>30</sub> O <sub>3</sub>               | ChemSpider ID<br>17220744 | 294.22                | -0.00065              |
| 192 | 2-Hexenoylcarnitine                                         | C <sub>13</sub> H <sub>23</sub> NO <sub>4</sub>              | 99452-58-1                | 257.16                | -0.00054              |
| 193 | 13-Hydroxyoctadecadienoic acid                              | C <sub>18</sub> H <sub>32</sub> O <sub>3</sub>               | 29623-28-7                | 296.23                | -0.00068              |
| 194 | 13(S)-Hydroperoxylinoleic acid                              | C <sub>18</sub> H <sub>32</sub> O <sub>4</sub>               | 33964-75-9                | 312.23                | -0.00075              |
| 195 | 13(S)-HpOTrE;13-Hydroperoxy-9,11E,15Z-octadecatrienoic acid | C <sub>18</sub> H <sub>30</sub> O <sub>4</sub>               | ChemSpider ID<br>4445993  | 310.21                | -0.00072              |
| 196 | 12-Oxo phytodienoic acid                                    | C <sub>18</sub> H <sub>28</sub> O <sub>3</sub>               | 85551-10-6                | 292.20                | -0.00066              |
| 197 | 12-Aminolauric Acid                                         | C <sub>12</sub> H <sub>25</sub> NO <sub>2</sub>              | 693-57-2                  | 215.19                | -0.00026              |
| 198 | 10-Gingerol                                                 | C <sub>21</sub> H <sub>34</sub> O <sub>4</sub>               | 23513-15-7                | 350.25                | -0.00059              |
| 199 | PC(16:0/18:3(6Z,9Z,12Z))                                    | C <sub>42</sub> H <sub>78</sub> NO <sub>8</sub> P            | 203393-39-9               | 755.55                | -0.00039              |
| 200 | PC(18:1(9Z)/18:2(9Z,12Z))                                   | C <sub>44</sub> H <sub>82</sub> NO <sub>8</sub> P            | 17041-44-0                | 783.57                | -0.00381              |
| 201 | PE(18:2(9Z,12Z)/0:0)                                        | C <sub>23</sub> H <sub>44</sub> NO <sub>7</sub> P            | 85046-18-0                | 477.28                | -0.00079              |
| 202 | PE(16:0/20:4)                                               | C <sub>41</sub> H <sub>74</sub> NO <sub>8</sub> P            | 70812-59-8                | 739.51                | -0.00149              |
| 203 | PE(18:2(9Z,12Z)/18:3(9Z,12Z,15Z))                           | C <sub>41</sub> H <sub>72</sub> NO <sub>8</sub> P            | ChemSpider ID<br>24768558 | 737.50                | -0.00123              |
| 204 | (10E,15Z)-9,12,13-Trihydroxy-10,15-octadecadienoic acid     | C <sub>18</sub> H <sub>32</sub> O <sub>5</sub>               | 95341-44-9                | 328.22                | -0.00060              |
| 205 | N-Undecanoylglycine                                         | C <sub>13</sub> H <sub>25</sub> NO <sub>3</sub>              | 83871-09-4                | 243.18                | -0.00025              |
| 206 | 7-epi-JasmonicAcid                                          | C <sub>12</sub> H <sub>18</sub> O <sub>3</sub>               | 62653-85-4                | 210.13                | -0.00028              |

Note: Annot. Delta Mass represents the difference between the actual measured value of molecular weight and the theoretical value.

**Table S4-1.** Load matrix of principal components (C18 column, ESI+).

| Name                                     | Principal component |        |
|------------------------------------------|---------------------|--------|
|                                          | 1                   | 2      |
| Pipecolic acid                           | 9.151               | -0.521 |
| L-Norleucine                             | 2.297               | 2.304  |
| N,N-Diethylglycine                       | 0.688               | -0.821 |
| Allysine                                 | -0.257              | -0.641 |
| Ethyl methioninate                       | -0.336              | 0.705  |
| L-alpha-Glutamyl-L-hydroxyproline        | -0.454              | 0.246  |
| Cianidanol                               | -0.224              | 1.095  |
| Quercetin                                | -0.660              | 0.315  |
| Myricetin                                | -0.822              | -0.198 |
| 6-Methoxyquercetin                       | -0.762              | 0.038  |
| ECG                                      | -0.316              | 2.546  |
| EGCG                                     | -0.237              | 3.102  |
| 3,4-Dihydroxybenzaldehyde                | -0.201              | 2.642  |
| Protocatechuic acid                      | -0.467              | -0.637 |
| 3,4-Dihydroxyphenylacetic acid           | -0.725              | 0.185  |
| Gallic acid                              | -0.779              | -0.035 |
| Phloretin                                | -0.448              | -0.417 |
| 12-OPDA                                  | -0.622              | -0.616 |
| 9-KODE                                   | -0.700              | -0.598 |
| 9-Oxo-ODE                                | -0.785              | -0.594 |
| 9-J1-Phytostane                          | -0.836              | -0.590 |
| Linoleoyl ethanolamide                   | -0.646              | -0.612 |
| PC(18:3(9Z,12Z,15Z)/18:3(9Z,12Z,15Z))    | -0.550              | -0.488 |
| Guanine                                  | 3.365               | -0.315 |
| 1-Methylxanthine                         | -0.429              | -0.591 |
| 2'-Deoxyadenosine                        | -0.500              | -0.601 |
| Guanosine                                | 1.858               | -0.384 |
| 5'-S-Methyl-5'-thioadenosine             | -0.388              | 0.537  |
| (2S)-2-Amino-4-hexynoic acid             | -0.433              | -0.624 |
| (E)-8-Hydroxy-2-octene-4,6-dienoic acid  | -0.806              | -0.113 |
| 2-Hydroxy-6-oxonona-2,4-diene-1,9-dioate | -0.745              | -0.561 |
| N-Succinyl-L,L-2,6-diaminopimelate       | -0.731              | -0.422 |
| Luteic acid                              | -0.773              | 0.075  |
| Stachydrine                              | 0.443               | -0.729 |
| Methyl gallate                           | -0.666              | 0.069  |
| Ellagic acid                             | -0.828              | -0.334 |
| Procyanidin B2                           | -0.830              | -0.348 |
| 4-Hydroxycoumarin                        | -0.464              | -0.652 |
| 1-Vinyl-2-pyrrolidone                    | 0.568               | -0.744 |
| N-Acetylpyrrolidine                      | -0.317              | -0.665 |
| 4-Hydroxybenzaldehyde                    | -0.397              | 2.073  |

| Name                           | Principal component |        |
|--------------------------------|---------------------|--------|
|                                | 1                   | 2      |
| 2-Hydroxy-1,4-benzoquinone     | -0.509              | -0.447 |
| 5-Formylsalicylaldehyde        | -0.747              | 0.123  |
| 3,4-Dihydroxymandelaldehyde    | -0.785              | -0.551 |
| Allyl salicylate               | -0.780              | -0.569 |
| Rhamnopterin                   | 1.181               | 0.105  |
| Di-2-pentanyl malate           | -0.585              | -0.513 |
| Pheophorbide A                 | 2.988               | -0.230 |
| Initial eigenvalue             | 2.770               | 0.946  |
| Variance contribution rate (%) | 69.243              | 23.650 |

**Table S4-2.** Load matrix of principal components (C18 column, ESI-).

| Name                                                                    | Principal component |        |
|-------------------------------------------------------------------------|---------------------|--------|
|                                                                         | 1                   | 2      |
| L-Theanine                                                              | 10.433              | -1.369 |
| Methyl gallate                                                          | 0.839               | 1.193  |
| Ellagic acid                                                            | 0.114               | 0.473  |
| Gallic acid                                                             | -0.724              | 0.039  |
| Digallic acid                                                           | -0.585              | -0.206 |
| (-)-Epigallocatechin gallate                                            | -0.142              | 1.215  |
| (-)-Epiafzelechin 3-O-gallate                                           | -0.709              | 0.084  |
| (-)-Epicatechin gallate                                                 | 0.337               | 2.069  |
| Salicylic acid                                                          | 0.831               | 1.186  |
| Protocatechuic acid                                                     | 0.346               | -0.885 |
| 3,4-Dihydroxyphenylacetic acid                                          | -0.677              | -0.154 |
| Theaflavic acid                                                         | -0.714              | -0.131 |
| 4-Hydroxycinnamic acid                                                  | 0.647               | -0.522 |
| Theogallin                                                              | -0.083              | 0.677  |
| 3',4',5,7-Tetrahydroxyflavanone                                         | -0.651              | -0.088 |
| Cianidanol                                                              | 4.212               | 1.209  |
| 2-(3,4-Dihydroxyphenyl)-5,7-dihydroxy-3,6,8-trimethoxy-4H-chromen-4-one | -0.736              | 0.027  |
| 3,4,5,7,3',4',5'-Heptahydroxyflavan                                     | 0.472               | -0.737 |
| Phloretin                                                               | -0.577              | -0.188 |
| Gossypin                                                                | -0.732              | 0.039  |
| Dihydromyricetin                                                        | -0.708              | -0.112 |
| 4-Methyl-6,7-diacetoxycoumarin                                          | -0.462              | -0.265 |
| Trimethyl 4-hydroxy-5-methyl-1,2,3-benzenetricarboxylate                | -0.001              | -0.229 |
| Lauric anhydride                                                        | -0.687              | -0.069 |
| Bis(2-butoxyethyl) adipate                                              | -0.114              | -0.024 |
| 6-Acetyl-4,5,7,8-tetrahydroxynaphthalene-1,2-dione                      | 0.114               | -0.825 |
| 2-Hydroxy-6-ketononadienedioic acid                                     | -0.527              | -0.220 |
| 2-Acetoxy-3-[3-(4-hydroxy-phenyl)-acryloyloxy]-succinic acid            | -0.734              | -0.108 |
| '-Acetoxychavicol acetate                                               | -0.680              | -0.146 |
| 1,2,3,4,5,6-Heptanehexayl hexaacetate                                   | -0.710              | -0.034 |
| Hydroquinone                                                            | -0.481              | -0.278 |
| Benzyl beta-primeveroside                                               | -0.689              | -0.023 |
| Apiin                                                                   | -0.014              | -0.240 |
| 1,6-Di-O-galloyl-b-D-glucopyranose                                      | -0.552              | 0.372  |
| 20(S)-Ginsenoside                                                       | -0.578              | -0.157 |
| Fukiic acid                                                             | -0.629              | -0.120 |
| 5,5'-Dehydrodivanillate                                                 | -0.669              | -0.077 |
| 2-Amino-4-pyrimidinecarboxylate                                         | 0.399               | -0.407 |
| 2,5-Dihydroxyterephthalic acid                                          | -0.035              | -0.432 |

| Name                                                    | Principal component |        |
|---------------------------------------------------------|---------------------|--------|
|                                                         | 1                   | 2      |
| 12-oxo Phytodienoic Acid                                | -0.461              | -0.058 |
| pinellic acid                                           | -0.371              | -0.058 |
| Phaseolic acid                                          | -0.732              | -0.115 |
| 16-Hydroxyhexadecanoic acid                             | -0.523              | -0.042 |
| 13-Hydroxyoctadecadienoic acid                          | -0.510              | -0.070 |
| 13(S)-Hydroperoxylinolenic acid                         | -0.335              | -0.082 |
| 12-Hydroxyoctadecanoic acid                             | -0.718              | -0.071 |
| (10E,15Z)-9,12,13-Trihydroxy-10,15-octadecadienoic acid | -0.497              | -0.040 |
| Initial eigenvalue                                      | 3.083               | 0.716  |
| Variance contribution rate (%)                          | 77.069              | 17.907 |

**Table S4-3.** Load matrix of principal components (Hilic column, ESI+).

| Name                               | Principal component |        |
|------------------------------------|---------------------|--------|
|                                    | 1                   | 2      |
| L-Leucine                          | 1.739               | -0.540 |
| Homocycloleucine                   | -0.740              | 0.034  |
| Acetyl-L-proline                   | -0.796              | 0.041  |
| 2-Morpholinoacetic acid            | -0.701              | 0.033  |
| N6-Methyladenosine                 | -0.750              | 0.044  |
| 1-Methylxanthine                   | -0.784              | 0.043  |
| Hypoxanthin                        | 0.562               | -0.260 |
| Cytosine                           | -0.496              | -0.022 |
| Adenine                            | 6.427               | -2.477 |
| Thiodiglycol                       | -0.764              | 0.046  |
| Octinoxate                         | -0.666              | 0.036  |
| N-Isopropylacrylamide              | 0.225               | -0.196 |
| Laurophenone                       | -0.804              | 0.050  |
| Choline O-Sulfate                  | 1.469               | -0.689 |
| 1-Vinyl-2-pyrrolidone              | -0.694              | 0.057  |
| 1,3,5-Norcaratriene                | 5.186               | 3.353  |
| Niacin                             | -0.705              | 0.026  |
| Nicotinamide                       | -0.559              | 0.103  |
| Theophylline                       | -0.495              | 0.005  |
| 4-Butyrobetaine                    | -0.783              | 0.048  |
| Pheophorbide A                     | -0.503              | -0.097 |
| Boc-GABA                           | -0.787              | 0.048  |
| Guvacine                           | -0.702              | 0.033  |
| 1-Aminocyclopropanecarboxylic acid | -0.772              | 0.166  |
| 1-alpha-Linolenoylglycerol         | -0.736              | 0.040  |
| Embelin                            | -0.762              | 0.029  |
| A-12(13)-EpODE                     | -0.339              | -0.007 |
| 13(S)-HpOTrE                       | -0.796              | 0.049  |
| 12-Oxo phytodienoic acid           | -0.475              | 0.002  |
| Initial eigenvalue                 | 3.108               | 0.767  |
| Variance contribution rate (%)     | 77.694              | 19.168 |
